# Supplementary material for: LC-DAD–ESI-MS/MS and NMR Analysis of Conifer Wood Specialized Metabolites
Source: MDPI journal article supplement (doi:10.3390/cells11203332), 2022-10-21
Supplement: s1 [file s1]

# LC-DAD-ESI-MS/MS and NMR analysis of conifer wood specialized metabolites

Andrzej Patyra <sup>1,2,3,\*</sup>, Marta Katarzyna Dudek <sup>4</sup> and Anna Karolina Kiss <sup>1,\*</sup>

<sup>1</sup> Department of Pharmacognosy and Molecular Basis of Phytotherapy, Medical University of Warsaw, Warsaw, Poland

<sup>2</sup> Doctoral School, Medical University of Warsaw, Warsaw, Poland

<sup>3</sup> Institut des Biomolécules Max Mousseron, Université de Montpellier, CNRS, ENSCM, Montpellier, France

<sup>4</sup> Structural Studies Department, Centre of Molecular and Macromolecular Studies, Polish Academy of Sciences, Łódź, Poland

\* Correspondence: andrzej.patyra@wum.edu.pl (A.P.); akiss@wum.edu.pl (A.K.K.)

## Supplementary Materials

|                                                                                                                                |    |
|--------------------------------------------------------------------------------------------------------------------------------|----|
| Figure S1. LC-DAD chromatogram of <i>Abies alba</i> Mill. branch wood methanolic extract taken at 190-450 nm. ....             | 6  |
| Figure S2. LC-DAD chromatogram of <i>Pinus sylvestris</i> L. branch wood methanolic extract taken at 190-450 nm. ....          | 6  |
| Figure S3. LC-DAD chromatogram of <i>Pinus mugo</i> Turra branch wood methanolic extract taken at 190-450 nm. ....             | 7  |
| Figure S4. LC-DAD chromatogram of <i>Pinus cembra</i> L. branch wood methanolic extract taken at 190-450 nm. ....              | 7  |
| Figure S5. LC-DAD chromatogram of <i>Pinus strobus</i> L. branch wood methanolic extract taken at 190-450 nm. ....             | 8  |
| Figure S6. LC-DAD chromatogram of <i>Pinus xraetica</i> Brügger branch wood methanolic extract taken at 190-450 nm. ....       | 8  |
| Figure S7. LC-DAD chromatogram of <i>Larix decidua</i> Mill. branch wood methanolic extract taken at 190-450 nm. ....          | 9  |
| Figure S8. LC-DAD chromatogram of <i>Larix polonica</i> Rac. branch wood methanolic extract taken at 190-450 nm. ....          | 9  |
| Figure S9. LC-DAD chromatogram of <i>Larix kaempferi</i> Lamb. branch wood methanolic extract taken at 190-450 nm. ....        | 10 |
| Figure S10. LC-DAD chromatogram of <i>Pseudotsuga menziesii</i> Mirb. branch wood methanolic extract taken at 190-450 nm. .... | 10 |
| Figure S11. LC-DAD chromatogram of <i>Tsuga canadensis</i> Carrière branch wood methanolic extract taken at 190-450 nm. ....   | 11 |
| Figure S12. LC-DAD chromatogram of <i>Picea abies</i> L. branch wood methanolic extract taken at 190-450 nm. ....              | 11 |
| Figure S13. LC-DAD chromatogram of <i>Picea glauca</i> (Moench) Voss branch wood methanolic extract taken at 190-450 nm. ....  | 12 |

|                                                                                                               |    |
|---------------------------------------------------------------------------------------------------------------|----|
| Figure S14. ESI-MS <sup>2</sup> spectrum of molecular ion at m/z 305 – compound (1).....                      | 12 |
| Figure S15. UV spectrum of compound (1).....                                                                  | 13 |
| Figure S16. ESI-MS <sup>2</sup> spectrum (negative ion mode) of molecular ion at m/z 577 – compound (2).....  | 13 |
| Figure S17. UV spectrum of compound (2).....                                                                  | 14 |
| Figure S18. ESI-MS <sup>2</sup> spectrum (negative ion mode) of molecular ion at m/z 577 – compound (3).....  | 14 |
| Figure S19. UV spectrum of compound (3).....                                                                  | 15 |
| Figure S20. ESI-MS <sup>2</sup> spectrum (negative ion mode) of molecular ion at m/z 865 – compound (4).....  | 15 |
| Figure S21. UV spectrum of compound (4).....                                                                  | 16 |
| Figure S22. ESI-MS <sup>2</sup> spectrum (negative ion mode) of molecular ion at m/z 289 – compound (5).....  | 16 |
| Figure S23. UV spectrum of compound (5).....                                                                  | 17 |
| Figure S24. ESI-MS <sup>2</sup> spectrum (negative ion mode) of molecular ion at m/z 577 – compound (6).....  | 17 |
| Figure S25. UV spectrum of compound (6).....                                                                  | 18 |
| Figure S26. ESI-MS <sup>2</sup> spectrum (negative ion mode) of molecular ion at m/z 289 – compound (7).....  | 18 |
| Figure S27. UV spectrum of compound (7).....                                                                  | 19 |
| Figure S28. ESI-MS <sup>2</sup> spectrum (negative ion mode) of molecular ion at m/z 319 – compound (8).....  | 19 |
| Figure S29. UV spectrum of compound (8).....                                                                  | 20 |
| Figure S30. ESI-MS <sup>2</sup> spectrum (negative ion mode) of molecular ion at m/z 375 – compound (9).....  | 20 |
| Figure S31. UV spectrum of compound (9).....                                                                  | 21 |
| Figure S32. ESI-MS <sup>2</sup> spectrum (negative ion mode) of molecular ion at m/z 405 – compound (10)..... | 21 |
| Figure S33. UV spectrum of compound (10).....                                                                 | 22 |
| Figure S34. ESI-MS <sup>2</sup> spectrum (negative ion mode) of molecular ion at m/z 287 – compound (11)..... | 22 |
| Figure S35. UV spectrum of compound (11).....                                                                 | 23 |
| Figure S36. ESI-MS <sup>2</sup> spectrum (negative ion mode) of molecular ion at m/z 375 – compound (12)..... | 23 |

|                                                                                                               |    |
|---------------------------------------------------------------------------------------------------------------|----|
| Figure S37. UV spectrum of compound (12).....                                                                 | 24 |
| Figure S38. ESI-MS <sup>2</sup> spectrum (negative ion mode) of molecular ion at m/z 465 – compound (13)..... | 24 |
| Figure S39. UV spectrum of compound (13).....                                                                 | 25 |
| Figure S40. ESI-MS <sup>2</sup> spectrum (negative ion mode) of molecular ion at m/z 405 – compound (14)..... | 25 |
| Figure S41. UV spectrum of compound (14).....                                                                 | 26 |
| Figure S42. ESI-MS <sup>2</sup> spectrum (negative ion mode) of molecular ion at m/z 577 – compound (15)..... | 26 |
| Figure S43. UV spectrum of compound (15).....                                                                 | 27 |
| Figure S44. ESI-MS <sup>2</sup> spectrum (negative ion mode) of molecular ion at m/z 421 – compound (16)..... | 27 |
| Figure S45. UV spectrum of compound (16).....                                                                 | 28 |
| Figure S46. ESI-MS <sup>2</sup> spectrum (negative ion mode) of molecular ion at m/z 389 – compound (17)..... | 28 |
| Figure S47. UV spectrum of compound (17).....                                                                 | 29 |
| Figure S48. ESI-MS <sup>2</sup> spectrum (negative ion mode) of molecular ion at m/z 303 – compound (18)..... | 29 |
| Figure S49. UV spectrum of compound (18).....                                                                 | 30 |
| Figure S50. ESI-MS <sup>2</sup> spectrum (negative ion mode) of molecular ion at m/z 465 – compound (19)..... | 30 |
| Figure S51. UV spectrum of compound (19).....                                                                 | 31 |
| Figure S52. ESI-MS <sup>2</sup> spectrum (negative ion mode) of molecular ion at m/z 359 – compound (20)..... | 31 |
| Figure S53. UV spectrum of compound (20).....                                                                 | 32 |
| Figure S54. ESI-MS <sup>2</sup> spectrum (negative ion mode) of molecular ion at m/z 419 – compound (21)..... | 32 |
| Figure S55. UV spectrum of compound (21).....                                                                 | 33 |
| Figure S56. ESI-MS <sup>2</sup> spectrum (negative ion mode) of molecular ion at m/z 373 – compound (22)..... | 33 |
| Figure S57. UV spectrum of compound (22).....                                                                 | 34 |
| Figure S58. ESI-MS <sup>2</sup> spectrum (negative ion mode) of molecular ion at m/z 361 – compound (23)..... | 34 |
| Figure S59. UV spectrum of compound (23).....                                                                 | 35 |

|                                                                                                               |    |
|---------------------------------------------------------------------------------------------------------------|----|
| Figure S60. ESI-MS <sup>2</sup> spectrum (negative ion mode) of molecular ion at m/z 287 – compound (24)..... | 35 |
| Figure S61. UV spectrum of compound (24).....                                                                 | 36 |
| Figure S62. ESI-MS <sup>2</sup> spectrum (negative ion mode) of molecular ion at m/z 317 – compound (25)..... | 36 |
| Figure S63. UV spectrum of compound (25).....                                                                 | 37 |
| Figure S64. ESI-MS <sup>2</sup> spectrum (negative ion mode) of molecular ion at m/z 557 – compound (26)..... | 37 |
| Figure S65. UV spectrum of compound (26).....                                                                 | 38 |
| Figure S66. ESI-MS <sup>2</sup> spectrum (negative ion mode) of molecular ion at m/z 405 – compound (27)..... | 38 |
| Figure S67. UV spectrum of compound (27).....                                                                 | 39 |
| Figure S68. ESI-MS <sup>2</sup> spectrum (negative ion mode) of molecular ion at m/z 555 – compound (28)..... | 39 |
| Figure S69. UV spectrum of compound (28).....                                                                 | 40 |
| Figure S70. ESI-MS <sup>2</sup> spectrum (negative ion mode) of molecular ion at m/z 373 – compound (29)..... | 40 |
| Figure S71. UV spectrum of compound (29).....                                                                 | 41 |
| Figure S72. ESI-MS <sup>2</sup> spectrum (negative ion mode) of molecular ion at m/z 357 – compound (30)..... | 41 |
| Figure S73. UV spectrum of compound (30).....                                                                 | 42 |
| Figure S74. ESI-MS <sup>2</sup> spectrum (negative ion mode) of molecular ion at m/z 301 – compound (31)..... | 42 |
| Figure S75. UV spectrum of compound (31).....                                                                 | 43 |
| Figure S76. ESI-MS <sup>2</sup> spectrum (negative ion mode) of molecular ion at m/z 357 – compound (32)..... | 43 |
| Figure S77. UV spectrum of compound (32).....                                                                 | 44 |
| Figure S78. ESI-MS <sup>2</sup> spectrum (negative ion mode) of molecular ion at m/z 271 – compound (33)..... | 44 |
| Figure S79. UV spectrum of compound (33).....                                                                 | 45 |
| Figure S80. ESI-MS <sup>2</sup> spectrum (negative ion mode) of molecular ion at m/z 211 – compound (34)..... | 45 |
| Figure S81. UV spectrum of compound (34).....                                                                 | 46 |
| Figure S82. ESI-MS <sup>2</sup> spectrum (negative ion mode) of molecular ion at m/z 255 – compound (35)..... | 46 |

|                                                                                                                                                                             |    |
|-----------------------------------------------------------------------------------------------------------------------------------------------------------------------------|----|
| Figure S83. UV spectrum of compound (35).....                                                                                                                               | 47 |
| Figure S84. ESI-MS <sup>2</sup> spectrum (negative ion mode) of molecular ion at m/z 313 – compound (36).....                                                               | 47 |
| Figure S85. UV spectrum of compound (36).....                                                                                                                               | 48 |
| Figure S86. ESI-MS <sup>2</sup> spectrum (positive ion mode) of molecular ion at m/z 227 – compound (37). ....                                                              | 48 |
| Figure S87. UV spectrum of compound (37).....                                                                                                                               | 49 |
| Figure S88. ESI-MS <sup>2</sup> spectrum (positive ion mode) of molecular ion at m/z 265 – compound (38). ....                                                              | 49 |
| Figure S89. UV spectrum of compound (38).....                                                                                                                               | 50 |
| Figure S90. ESI-MS <sup>2</sup> spectrum (positive ion mode) of molecular ion at m/z 303 – compound (39). ....                                                              | 50 |
| Figure S91. UV spectrum of compound (39).....                                                                                                                               | 51 |
| Figure S92. ESI-MS <sup>2</sup> spectrum (positive ion mode) of molecular ion at m/z 303 – compound (40). ....                                                              | 51 |
| Figure S93. UV spectrum of compound (40).....                                                                                                                               | 52 |
| Figure S94. <sup>1</sup> H NMR spectrum of compound (9). ....                                                                                                               | 53 |
| Figure S95. <sup>1</sup> H NMR spectrum of compound (12). ....                                                                                                              | 54 |
| Figure S96. <sup>1</sup> H NMR spectrum of compound (16). ....                                                                                                              | 55 |
| Figure S97. <sup>1</sup> H NMR spectrum of compound (20). ....                                                                                                              | 56 |
| Figure S98. <sup>1</sup> H NMR spectrum of compound (22). ....                                                                                                              | 57 |
| Figure S99. <sup>1</sup> H NMR spectrum of compound (23). ....                                                                                                              | 58 |
| Figure S100. <sup>1</sup> H NMR spectrum of compound (27). ....                                                                                                             | 59 |
| Figure S101. <sup>1</sup> H NMR spectrum of compound (29). ....                                                                                                             | 60 |
| Figure S102. <sup>1</sup> H NMR spectrum of compound (30). ....                                                                                                             | 61 |
| Figure S103. <sup>1</sup> H NMR spectrum of compound (32). ....                                                                                                             | 62 |
| Table S1. <sup>1</sup> H chemical shifts in ppm for compounds 9, 12, 16, 20, 22, 23, 27, 30 and 32 in methanol-d <sub>4</sub> and 29 in chloroform-d (500 MHz, 295 K). .... | 63 |
| Table S2. Canonical SMILES of identified compounds .....                                                                                                                    | 64 |

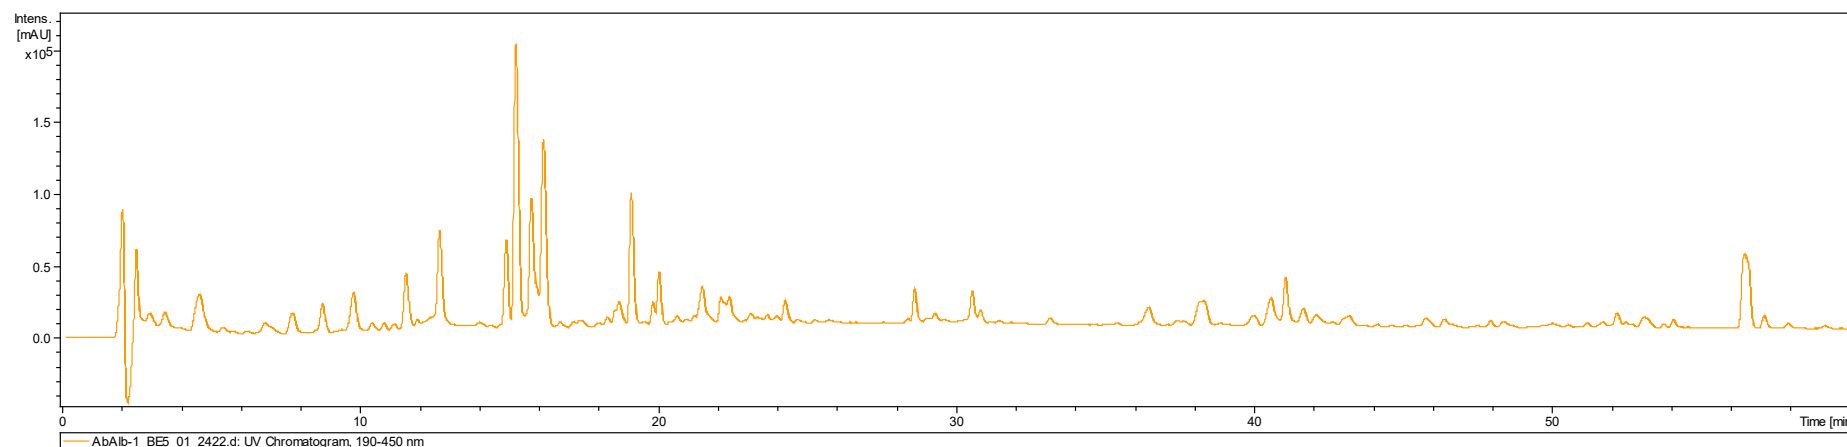

**Figure S1.** LC-DAD chromatogram of *Abies alba* Mill. branch wood methanolic extract taken at 190-450 nm.

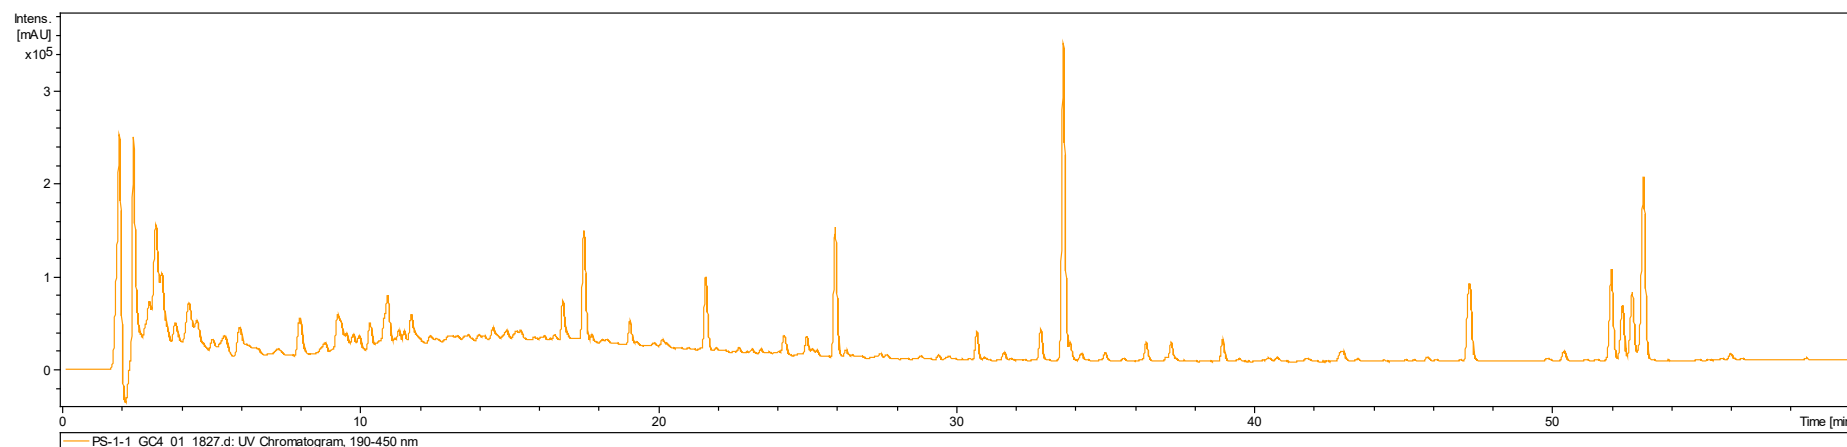

**Figure S2.** LC-DAD chromatogram of *Pinus sylvestris* L. branch wood methanolic extract taken at 190-450 nm.

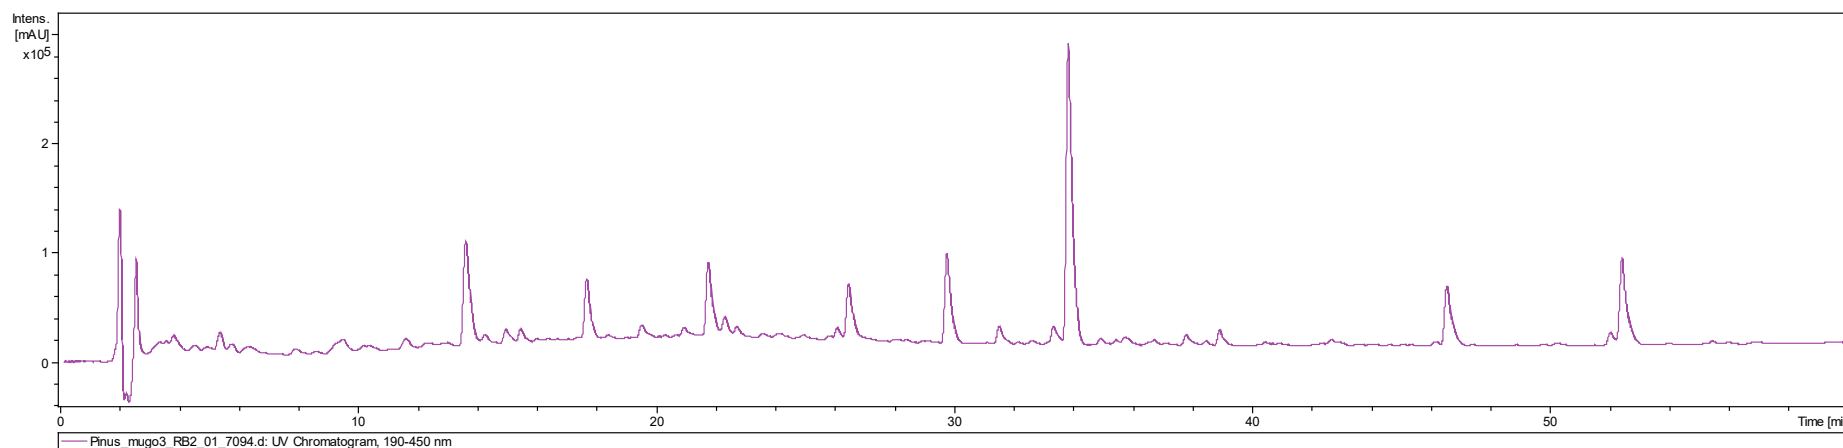

**Figure S3.** LC-DAD chromatogram of *Pinus mugo* Turra branch wood methanolic extract taken at 190-450 nm.

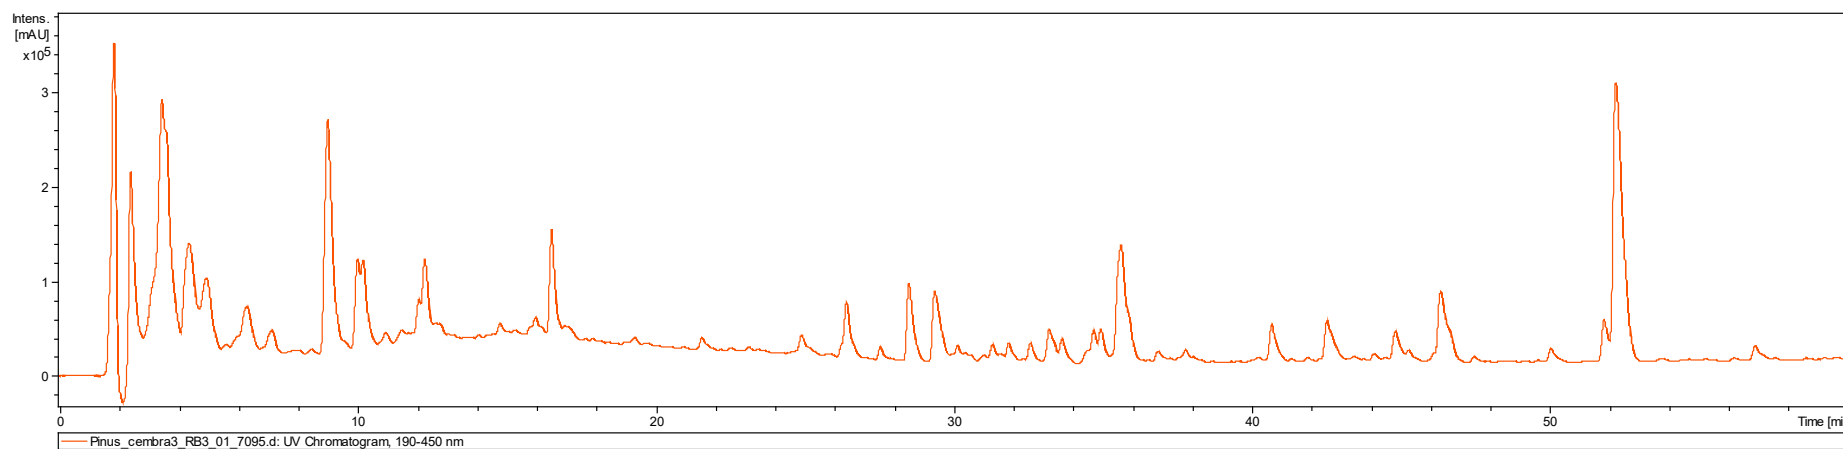

**Figure S4.** LC-DAD chromatogram of *Pinus cembra* L. branch wood methanolic extract taken at 190-450 nm.

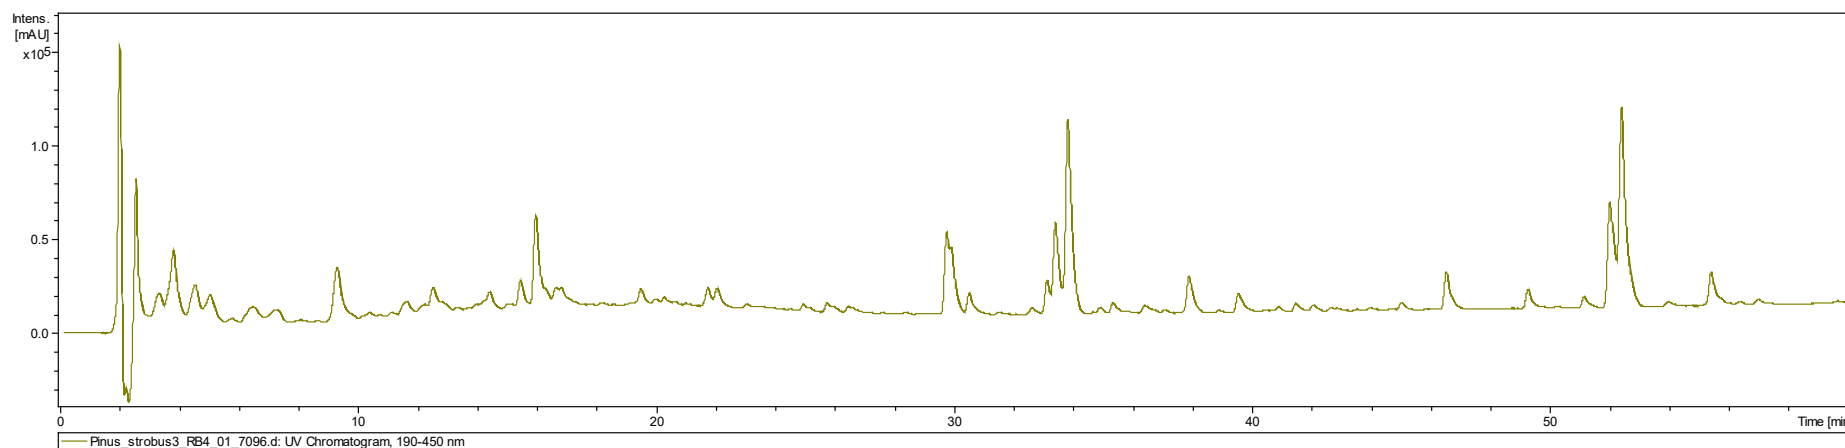

**Figure S5.** LC-DAD chromatogram of *Pinus strobus* L. branch wood methanolic extract taken at 190-450 nm.

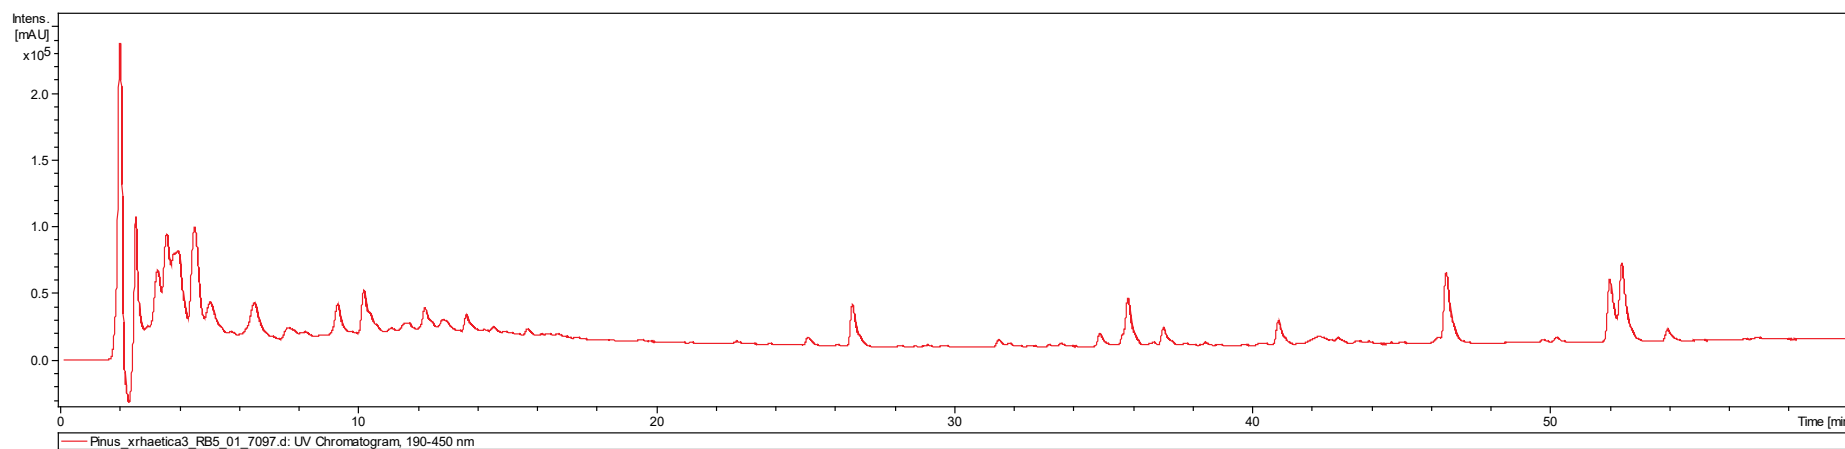

**Figure S6.** LC-DAD chromatogram of *Pinus x rhaetica* Brügger branch wood methanolic extract taken at 190-450 nm.



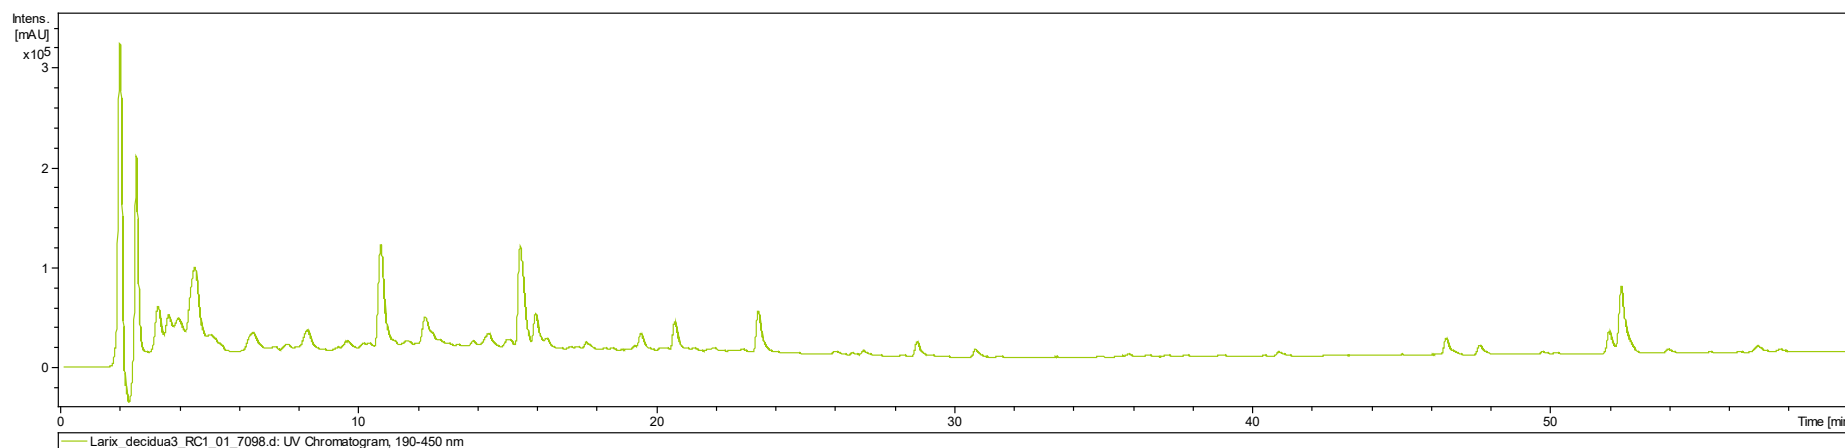

**Figure S7.** LC-DAD chromatogram of *Larix decidua* Mill. branch wood methanolic extract taken at 190-450 nm.

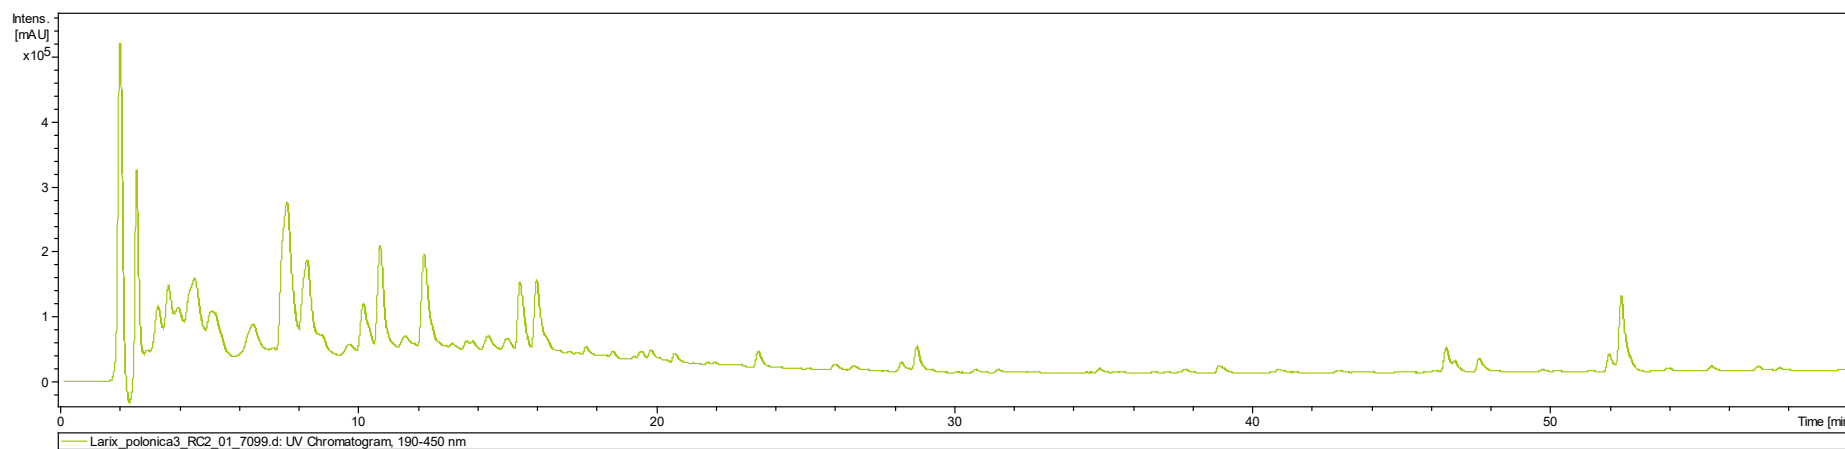

**Figure S8.** LC-DAD chromatogram of *Larix polonica* Rac. branch wood methanolic extract taken at 190-450 nm.

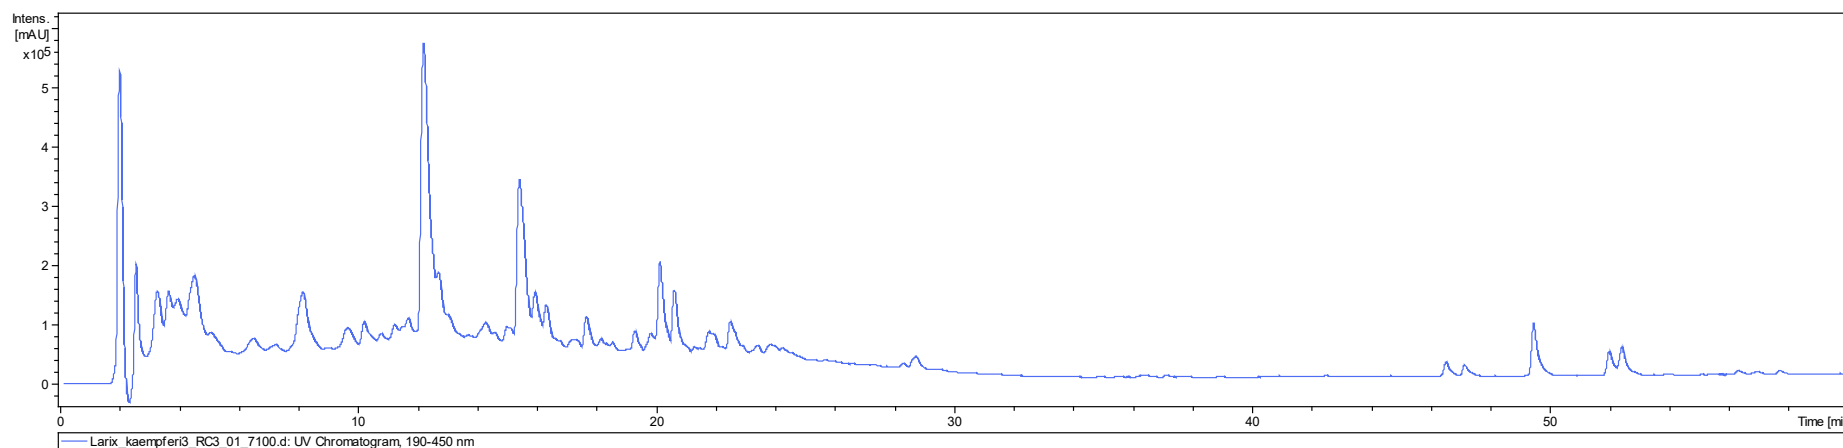

**Figure S9.** LC-DAD chromatogram of *Larix kaempferi* Lamb. branch wood methanolic extract taken at 190-450 nm.

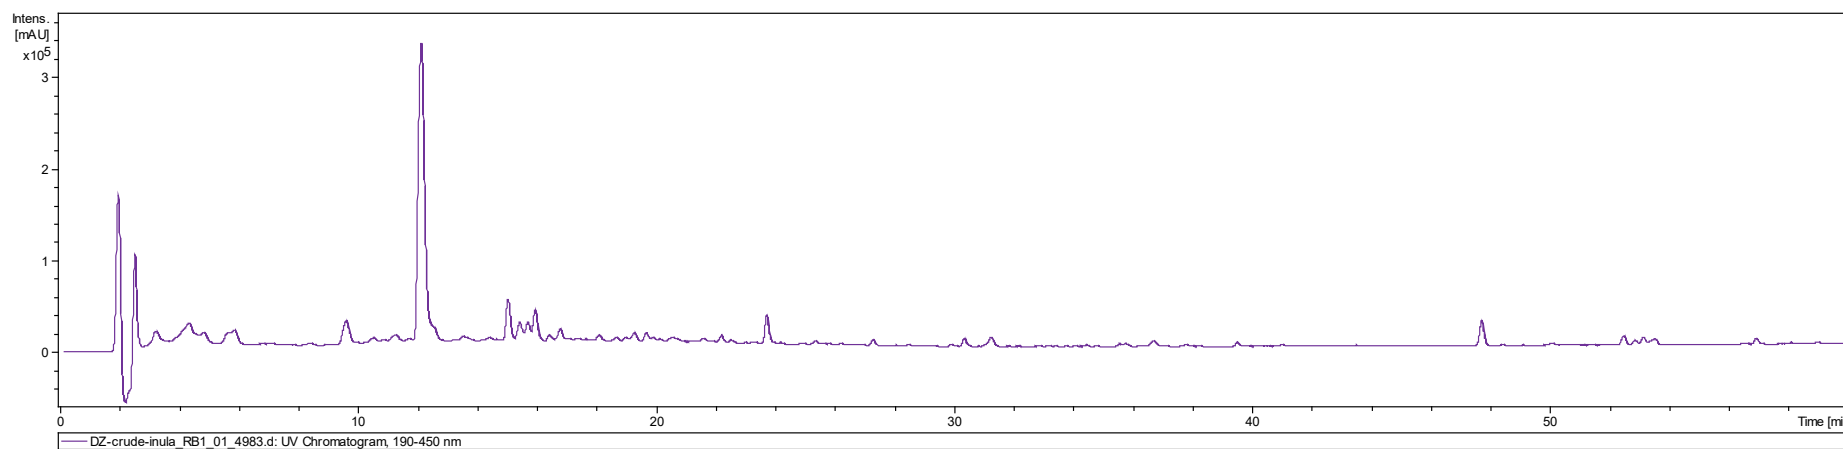

**Figure S10.** LC-DAD chromatogram of *Pseudotsuga menziesii* Mirb. branch wood methanolic extract taken at 190-450 nm.

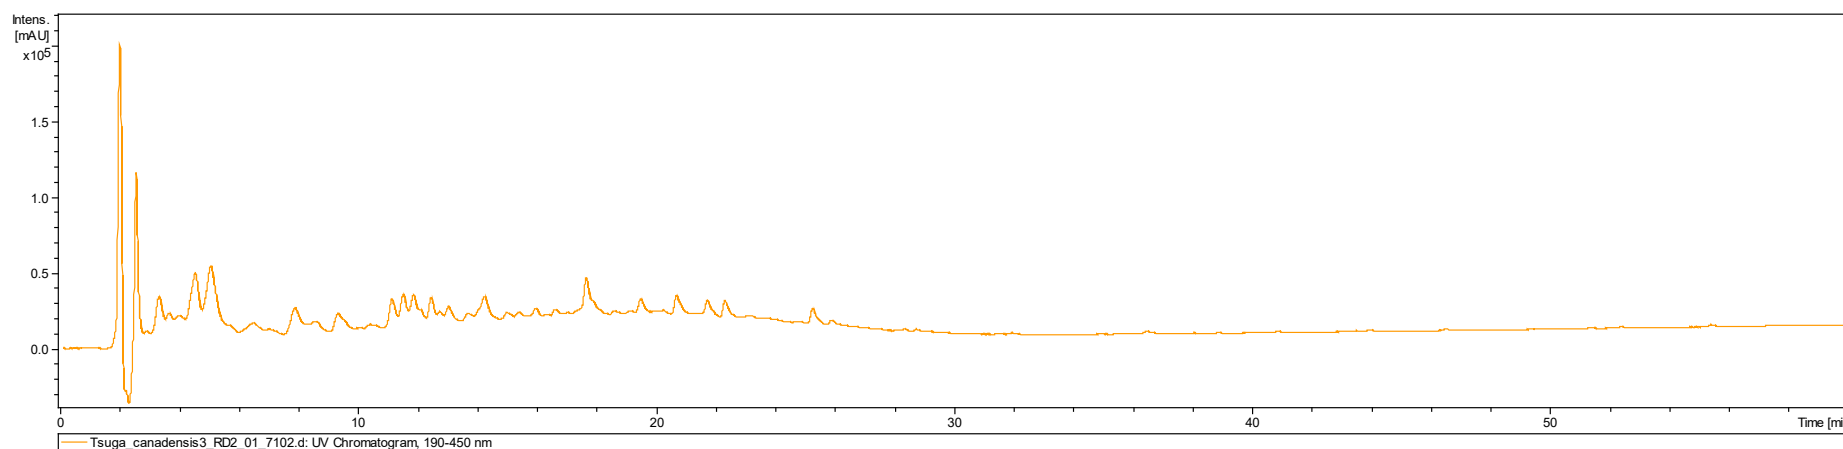

**Figure S11.** LC-DAD chromatogram of *Tsuga canadensis* Carrière branch wood methanolic extract taken at 190-450 nm.

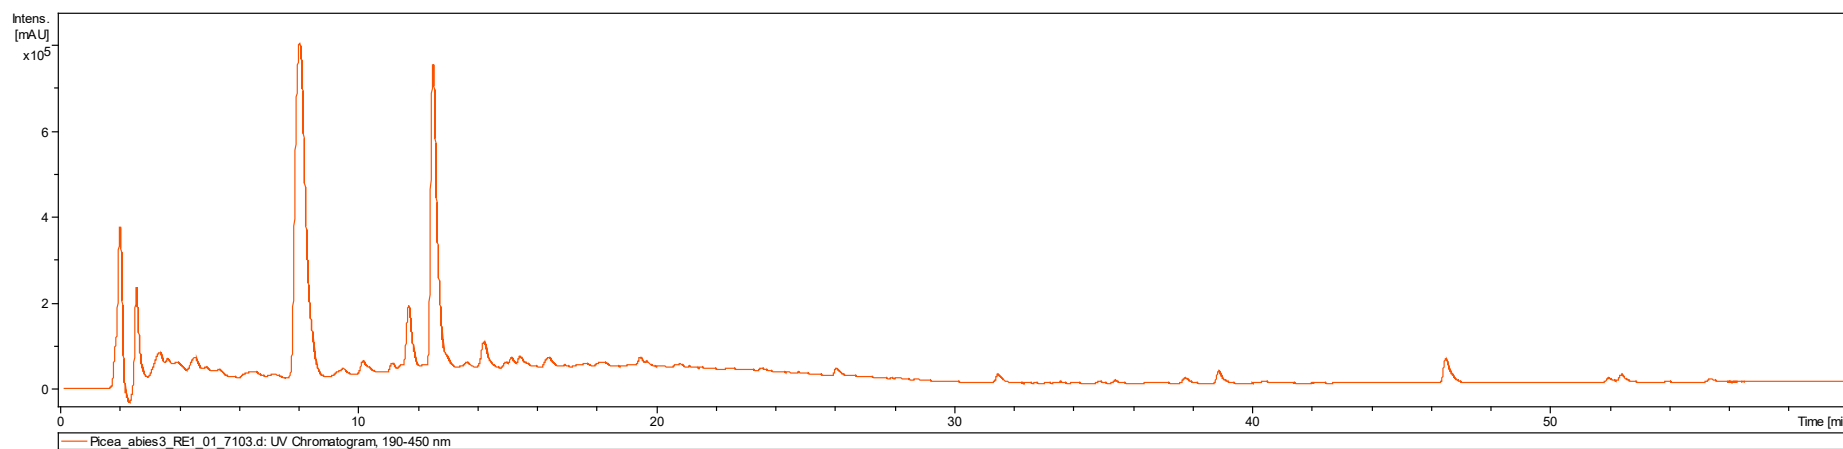

**Figure S12.** LC-DAD chromatogram of *Picea abies* L. branch wood methanolic extract taken at 190-450 nm.

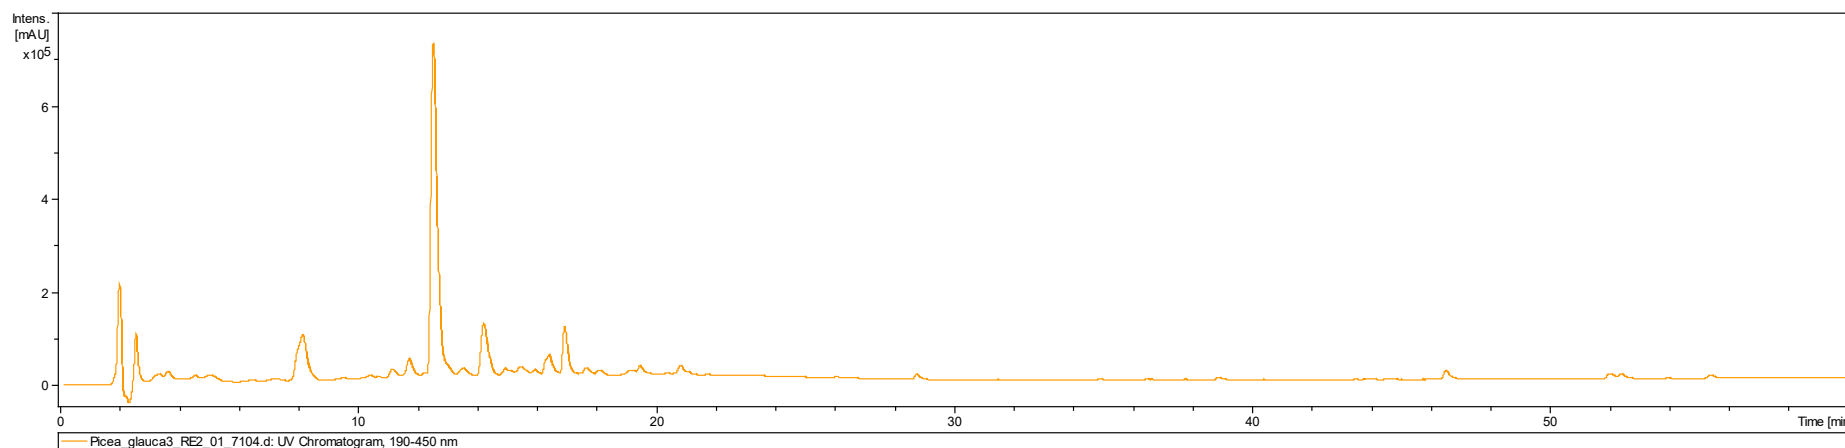

**Figure S13.** LC-DAD chromatogram of *Picea glauca* (Moench) Voss branch wood methanolic extract taken at 190-450 nm.

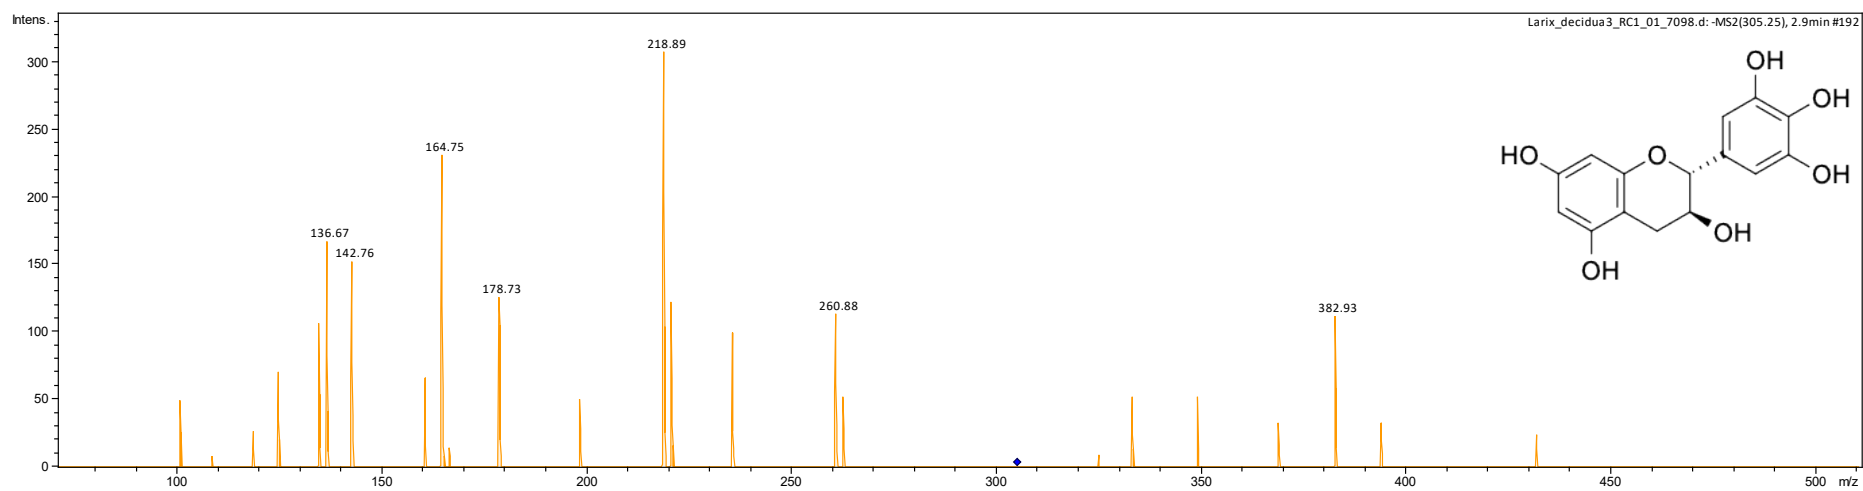

**Figure S14.** ESI-MS<sup>2</sup> spectrum of molecular ion at m/z 305 – compound (1).

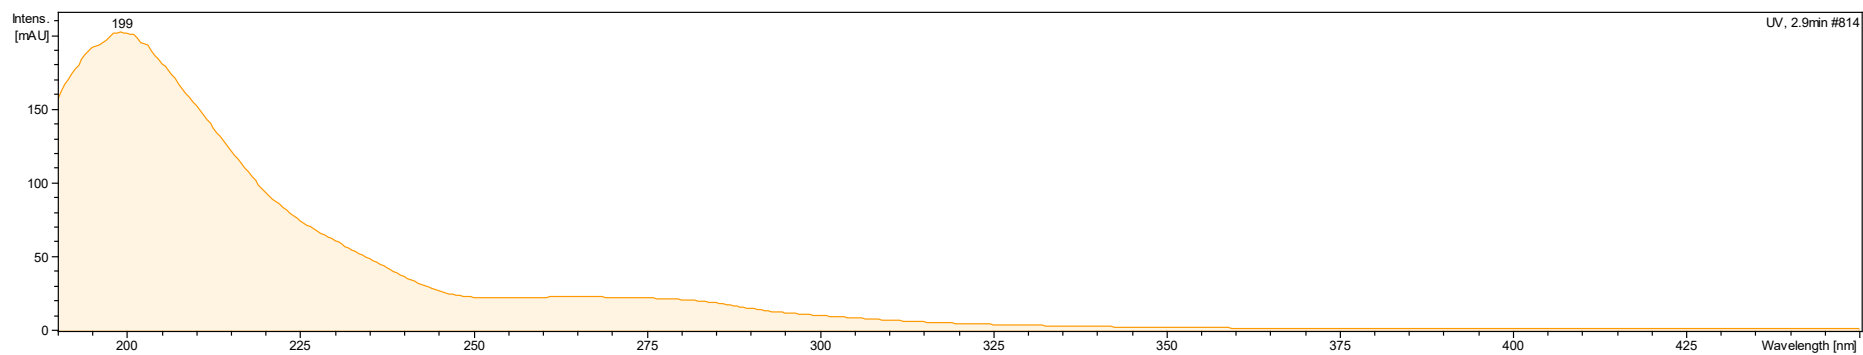

**Figure S15.** UV spectrum of compound (1).

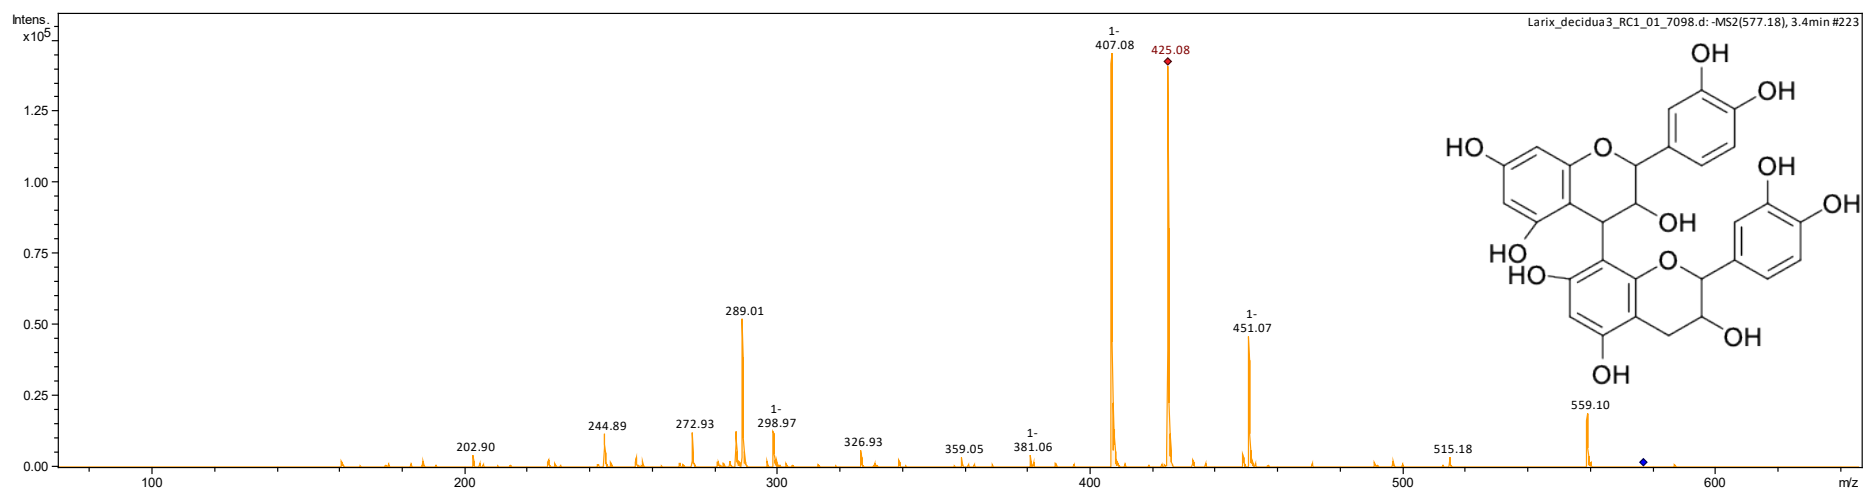

**Figure S16.** ESI-MS<sup>2</sup> spectrum (negative ion mode) of molecular ion at  $m/z$  577 – compound (2).

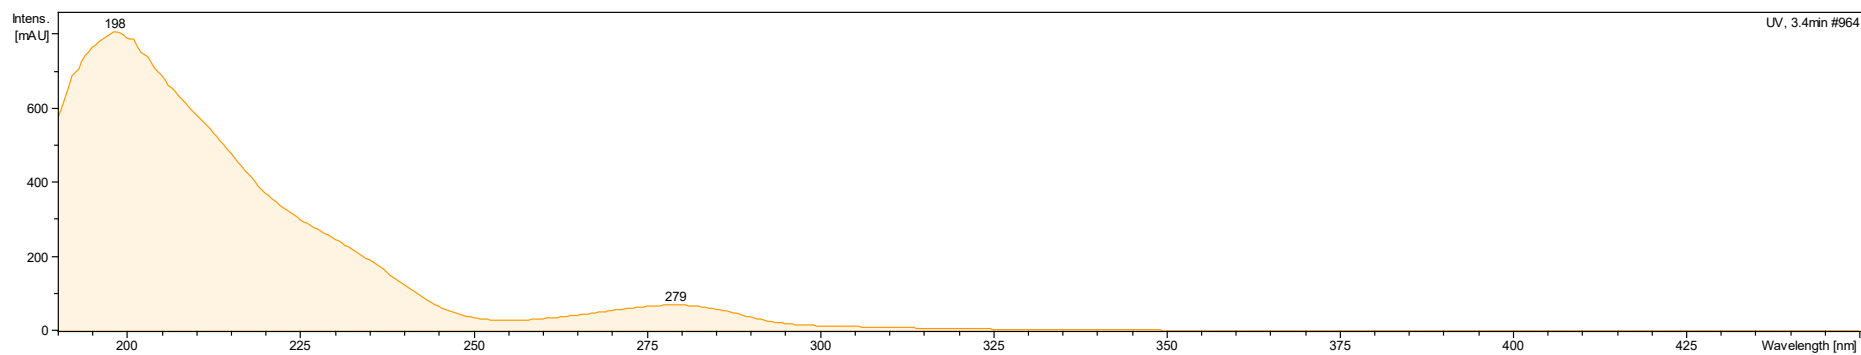

**Figure S17.** UV spectrum of compound (2).

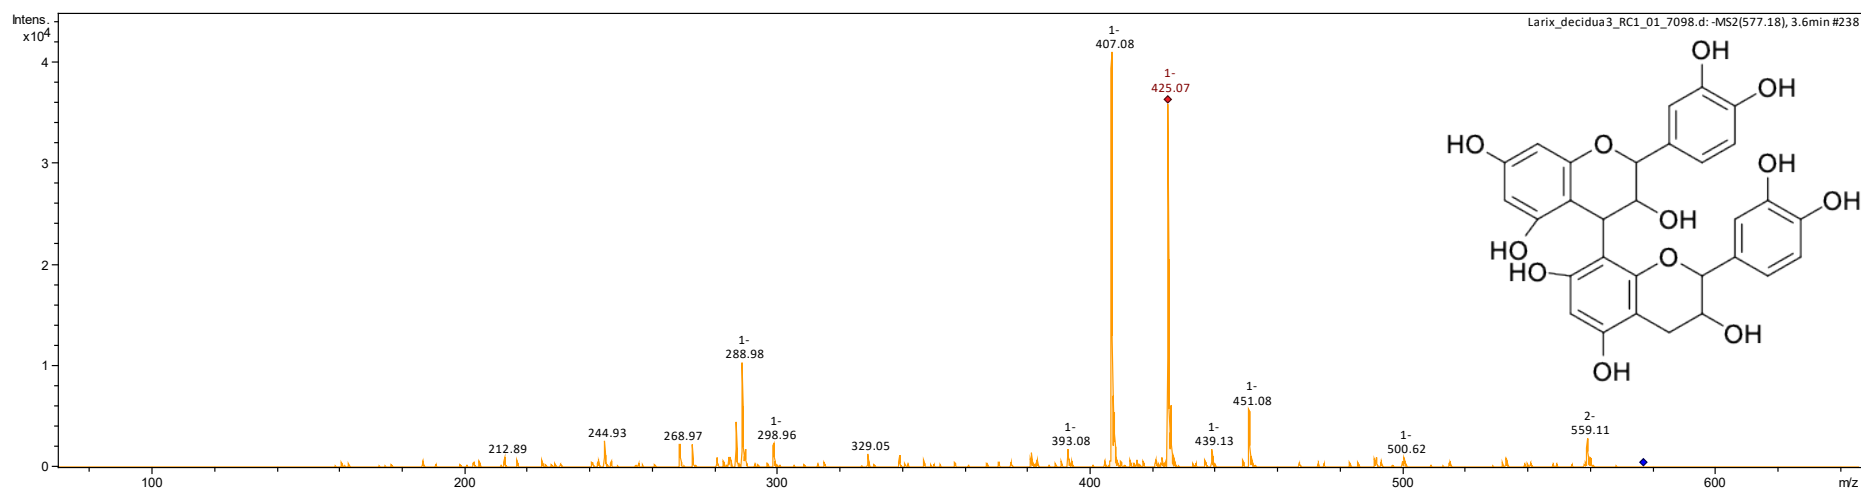

**Figure S18.** ESI-MS<sup>2</sup> spectrum (negative ion mode) of molecular ion at m/z 577 – compound (3).

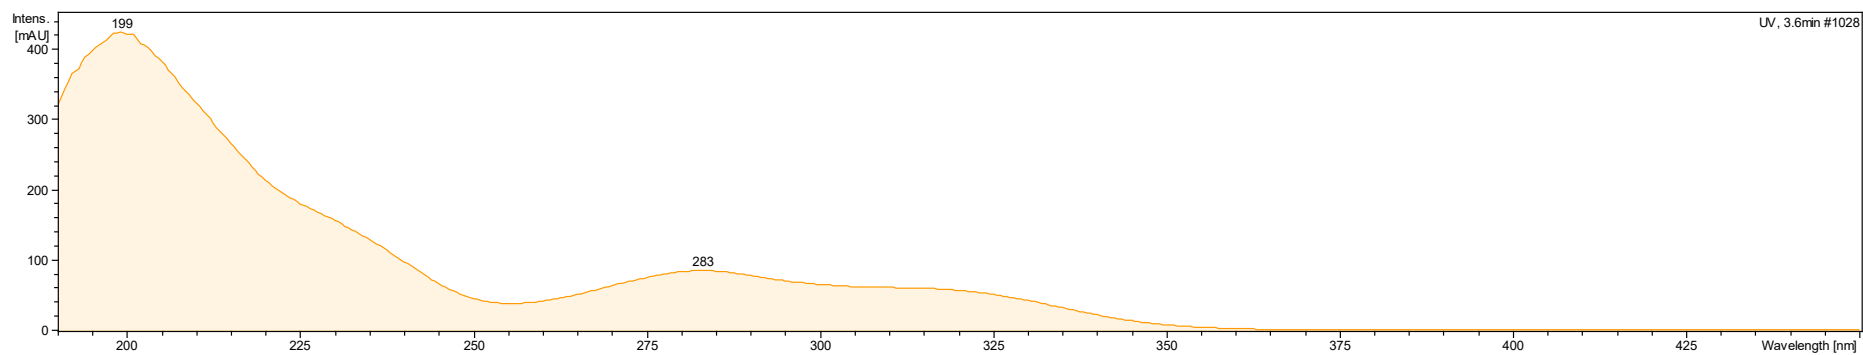

**Figure S19.** UV spectrum of compound (3).

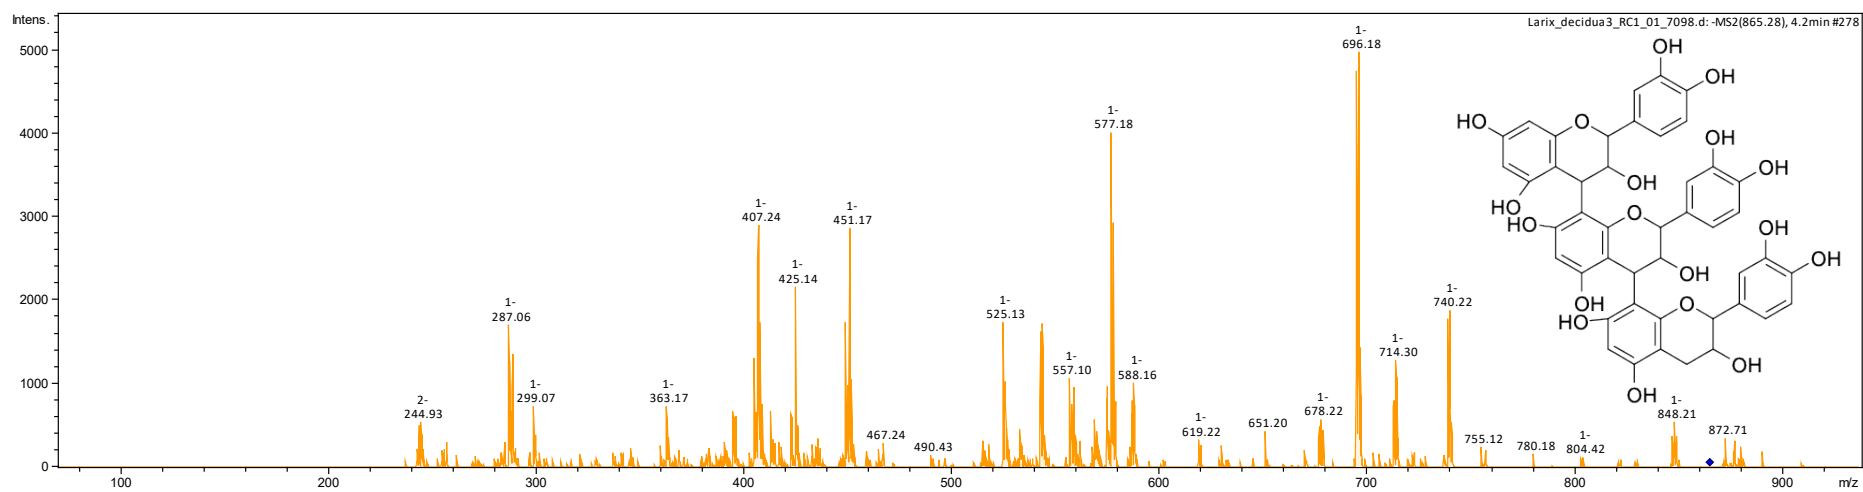

**Figure S20.** ESI-MS<sup>2</sup> spectrum (negative ion mode) of molecular ion at  $m/z$  865 – compound (4).

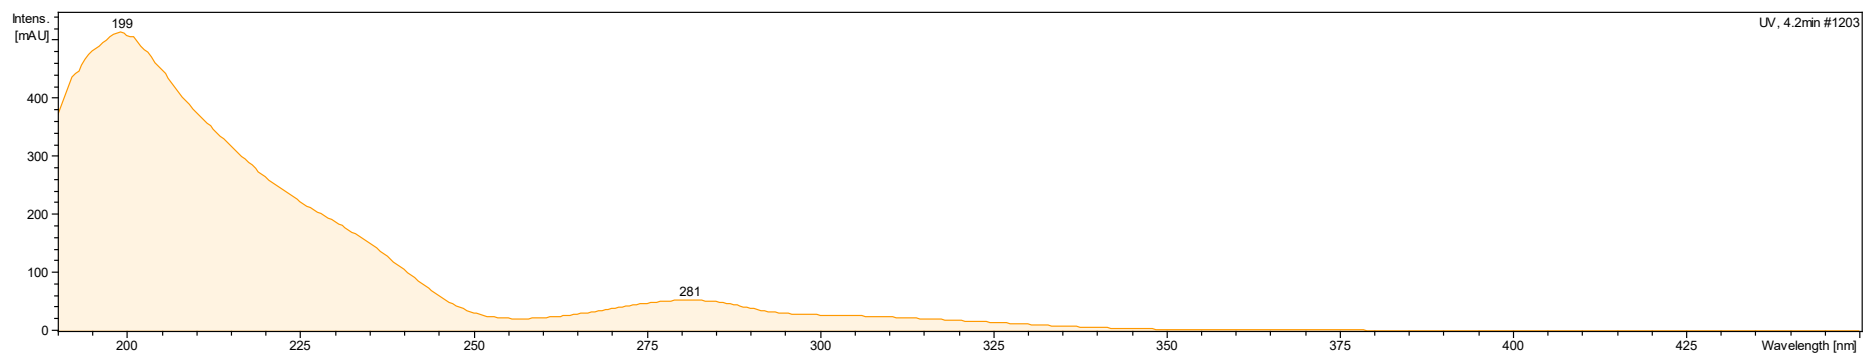

**Figure S21.** UV spectrum of compound (4).

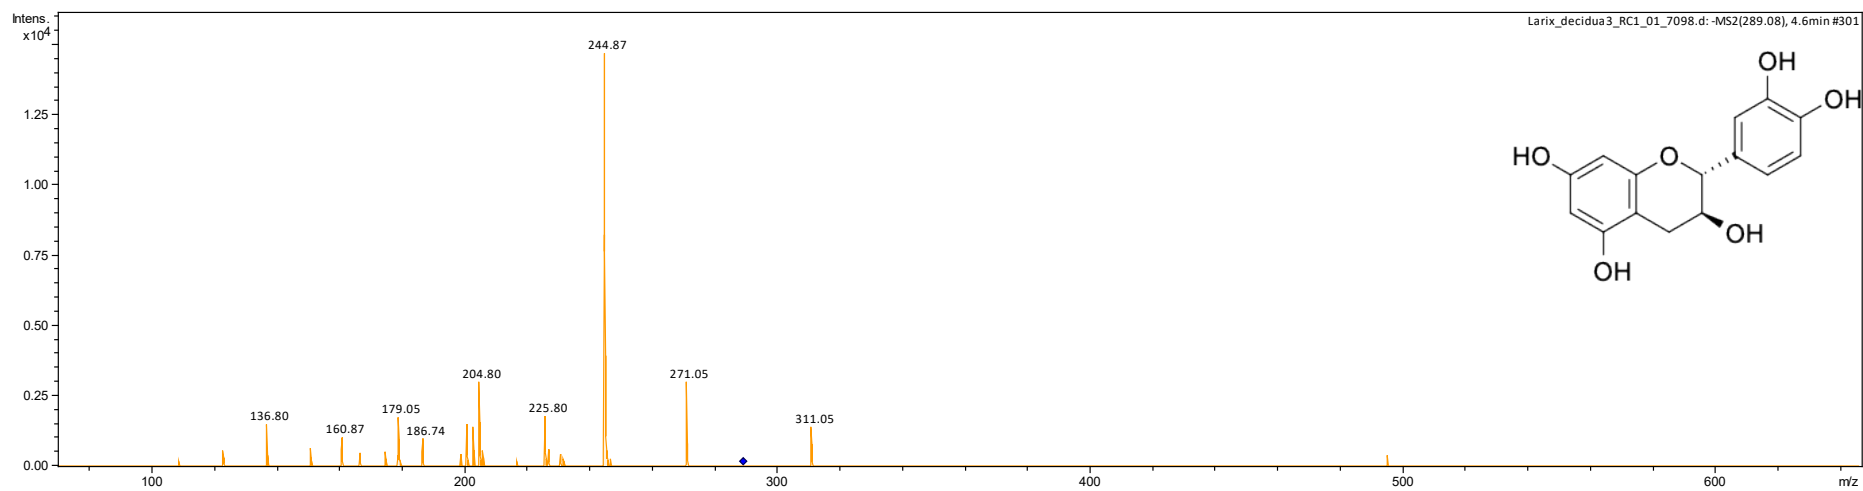

**Figure S22.** ESI-MS<sup>2</sup> spectrum (negative ion mode) of molecular ion at  $m/z$  289 – compound (5).



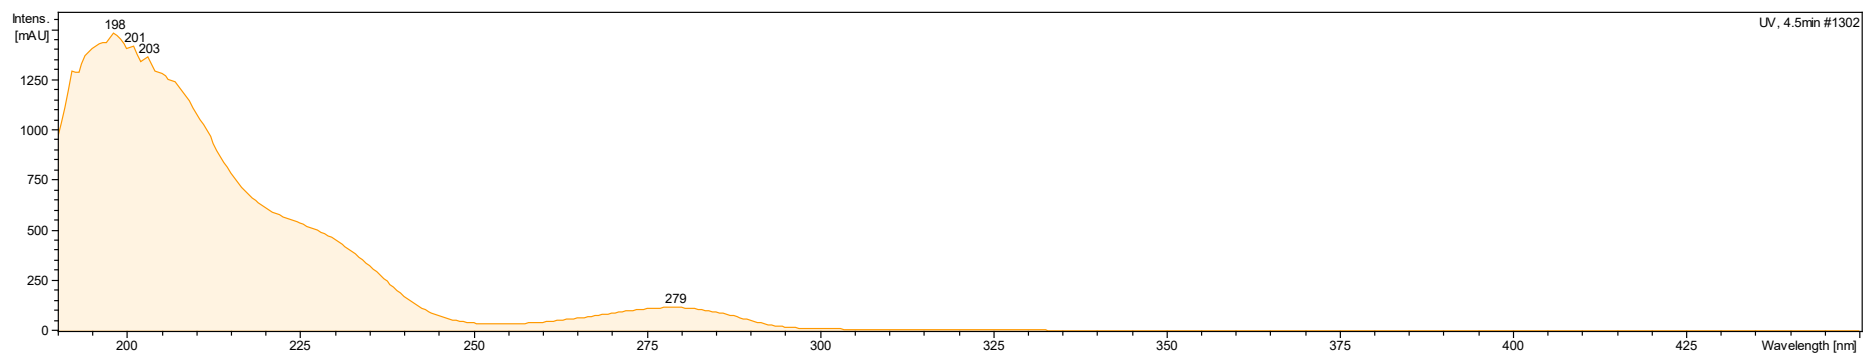

**Figure S23.** UV spectrum of compound (5).

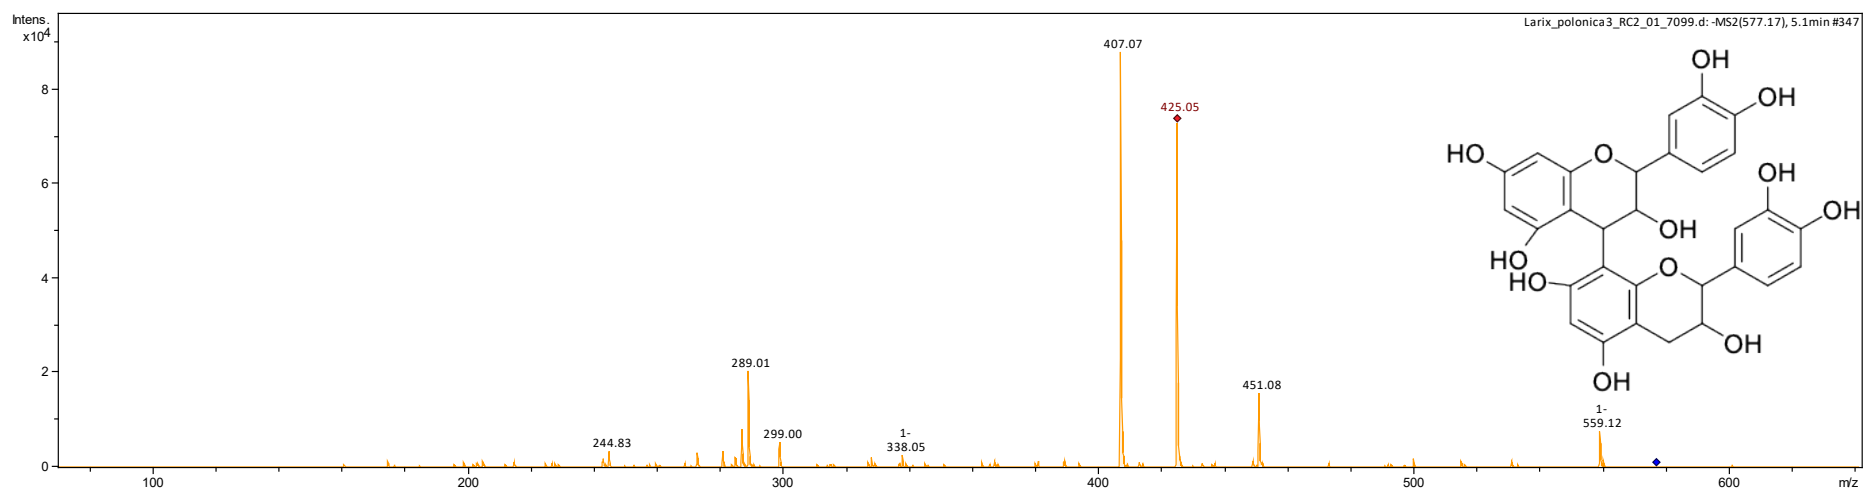

**Figure S24.** ESI-MS<sup>2</sup> spectrum (negative ion mode) of molecular ion at  $m/z$  577 – compound (6).

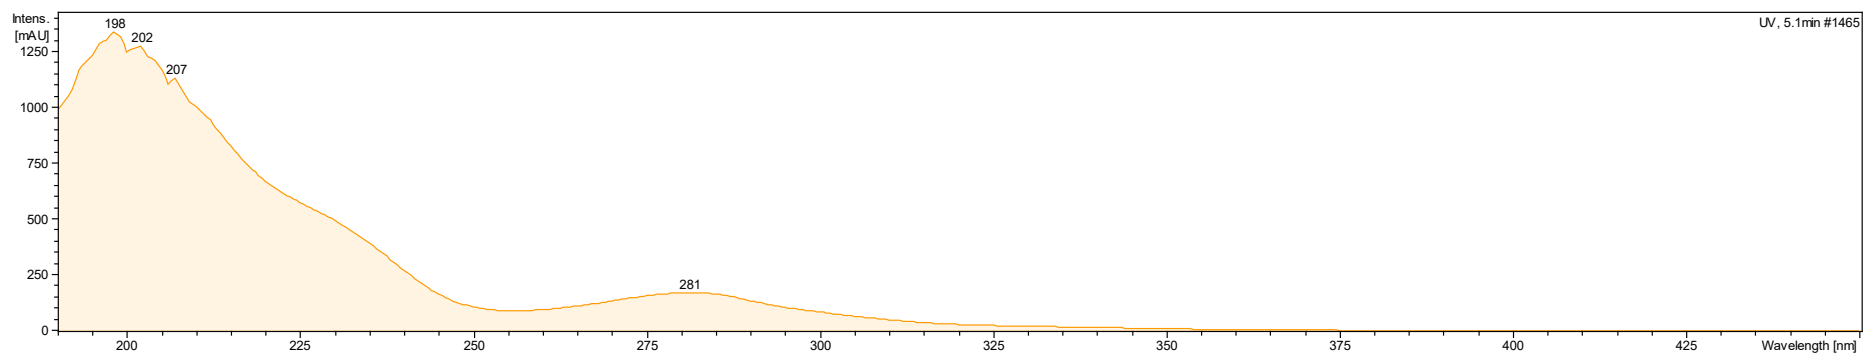

**Figure S25.** UV spectrum of compound (6).

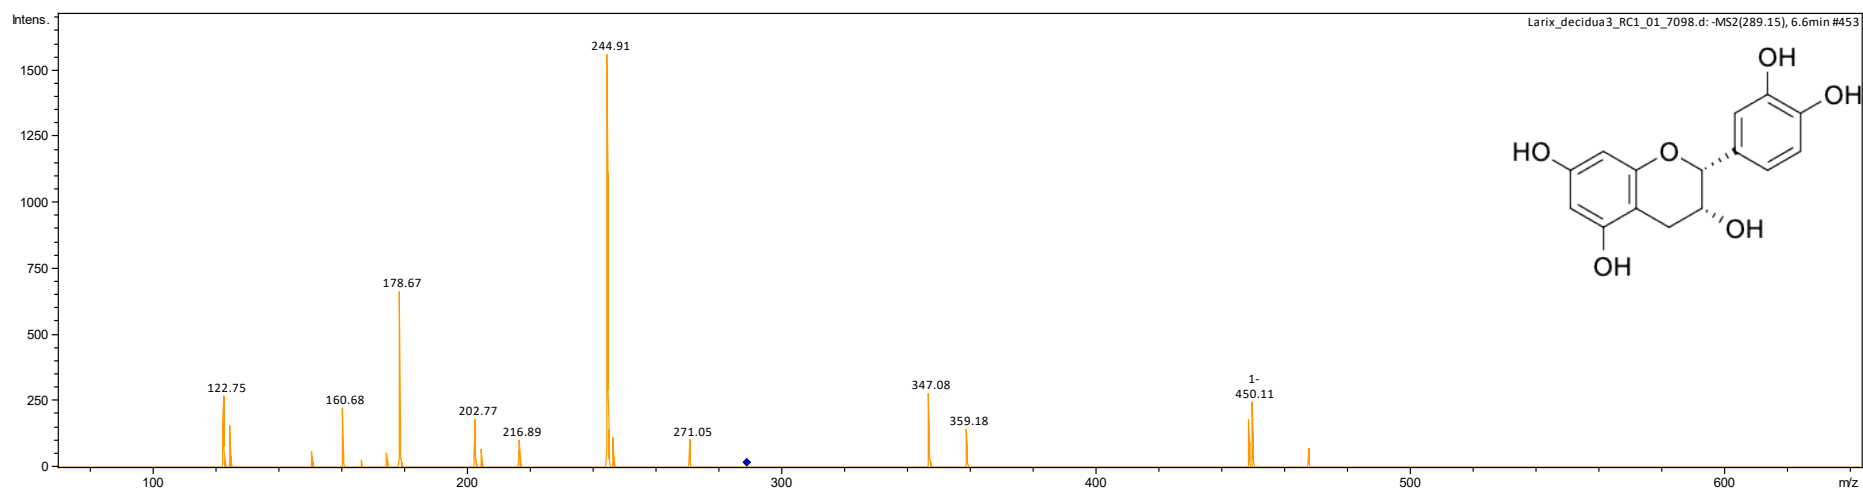

**Figure S26.** ESI-MS<sup>2</sup> spectrum (negative ion mode) of molecular ion at m/z 289 – compound (7).

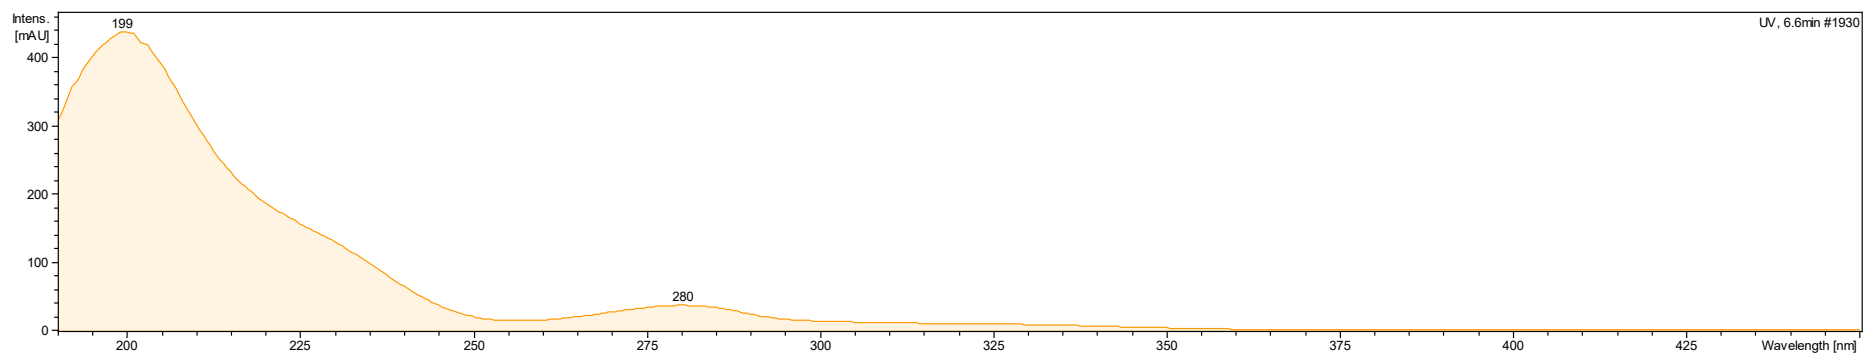

**Figure S27.** UV spectrum of compound (7).

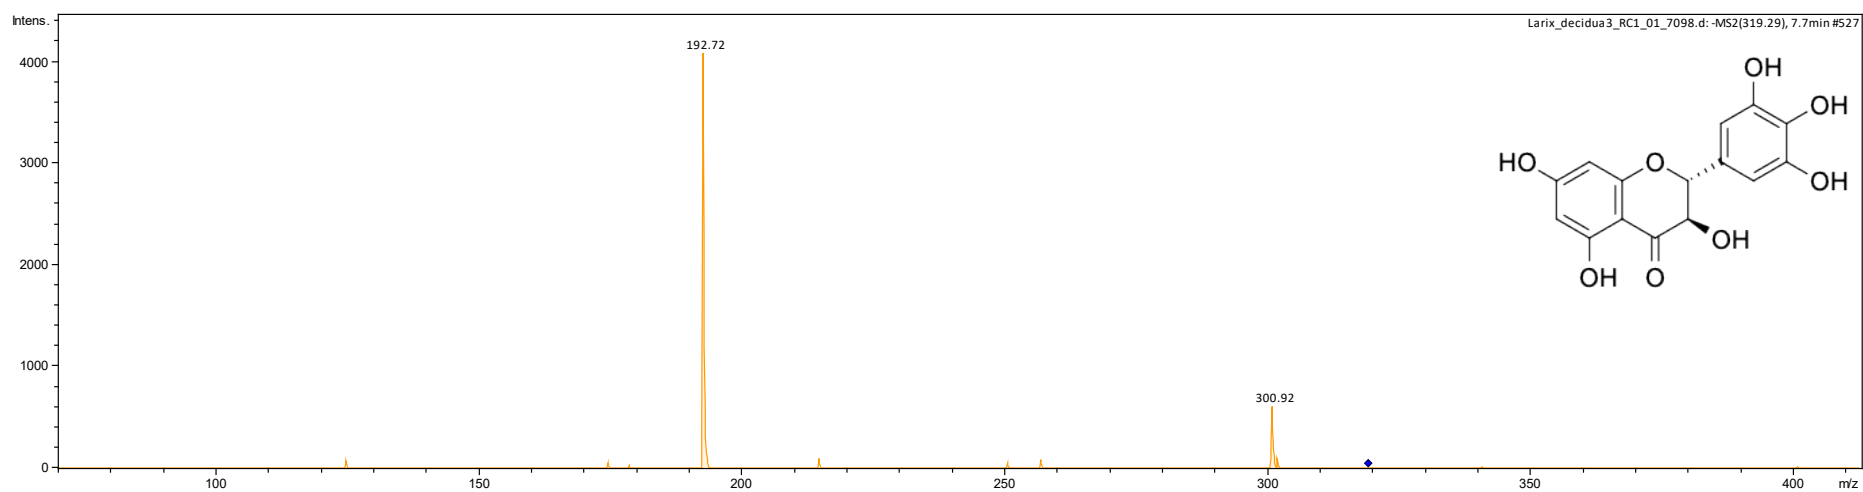

**Figure S28.** ESI-MS<sup>2</sup> spectrum (negative ion mode) of molecular ion at  $m/z$  319 – compound (8).

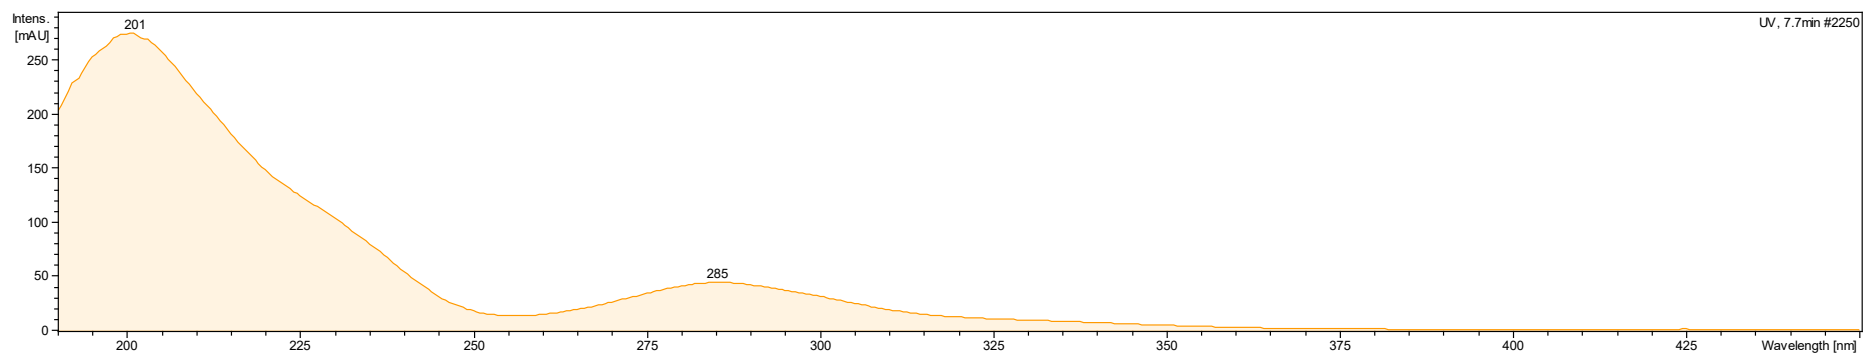

**Figure S29.** UV spectrum of compound (8).

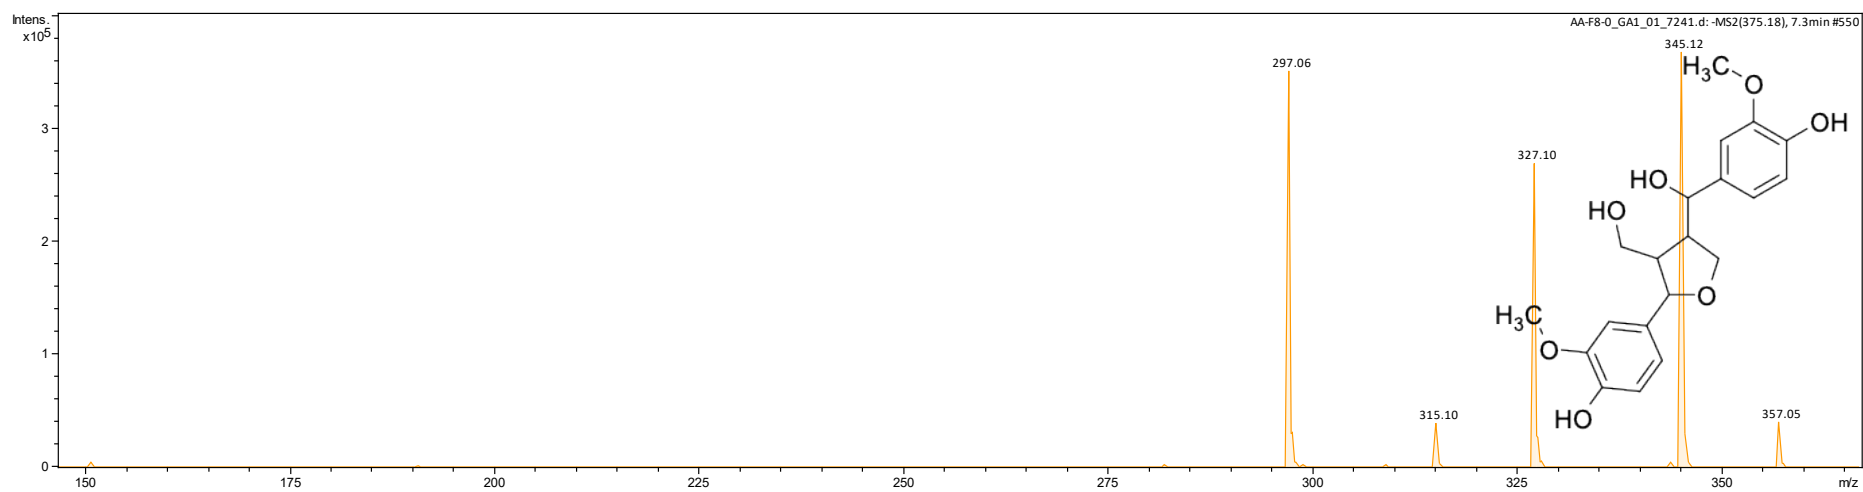

**Figure S30.** ESI-MS<sup>2</sup> spectrum (negative ion mode) of molecular ion at m/z 375 – compound (9).

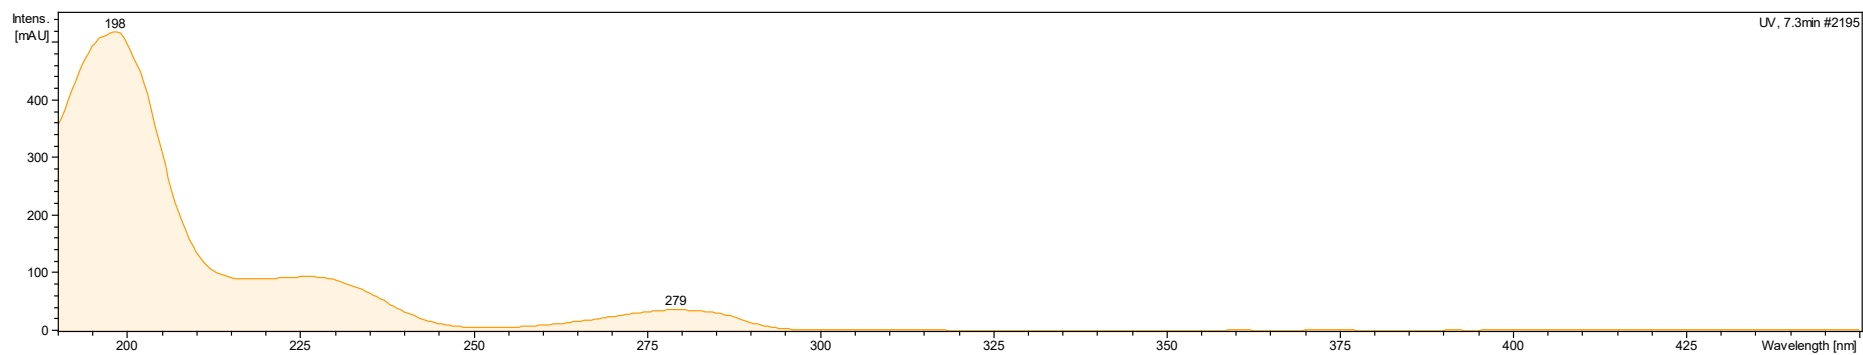

**Figure S31.** UV spectrum of compound (9).

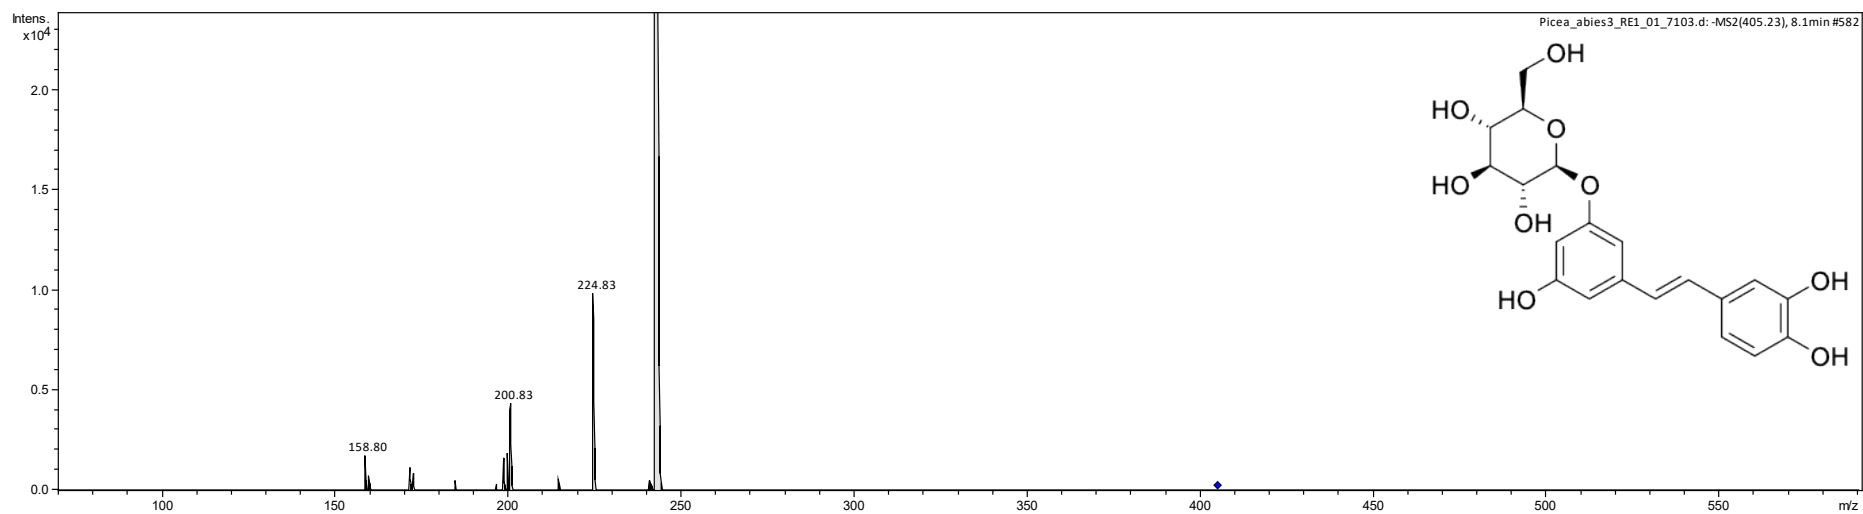

**Figure S32.** ESI-MS<sup>2</sup> spectrum (negative ion mode) of molecular ion at  $m/z$  405 – compound (10).

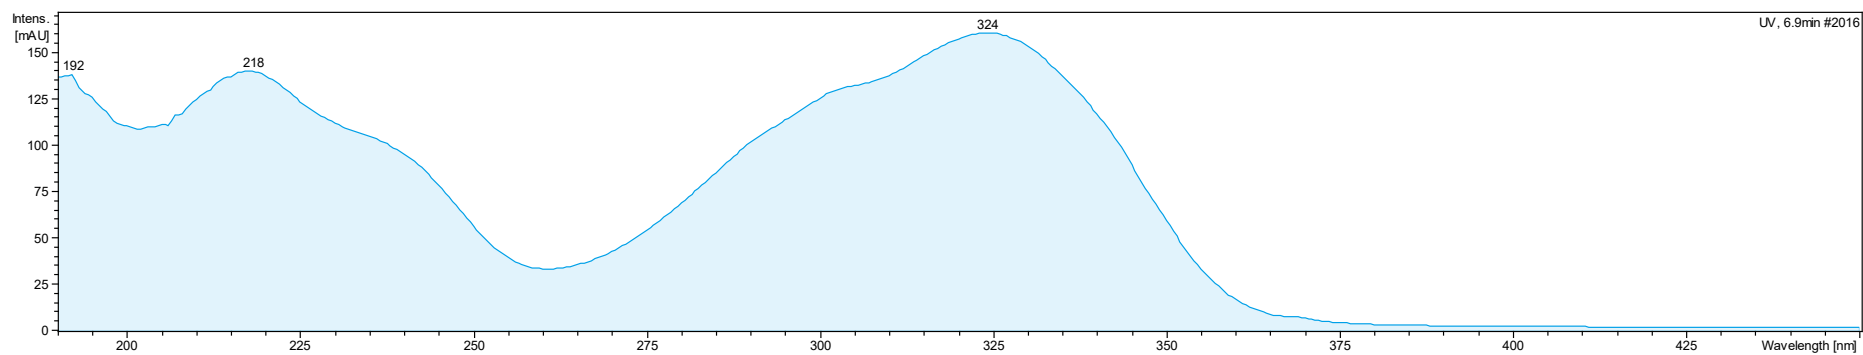

**Figure S33.** UV spectrum of compound (10).

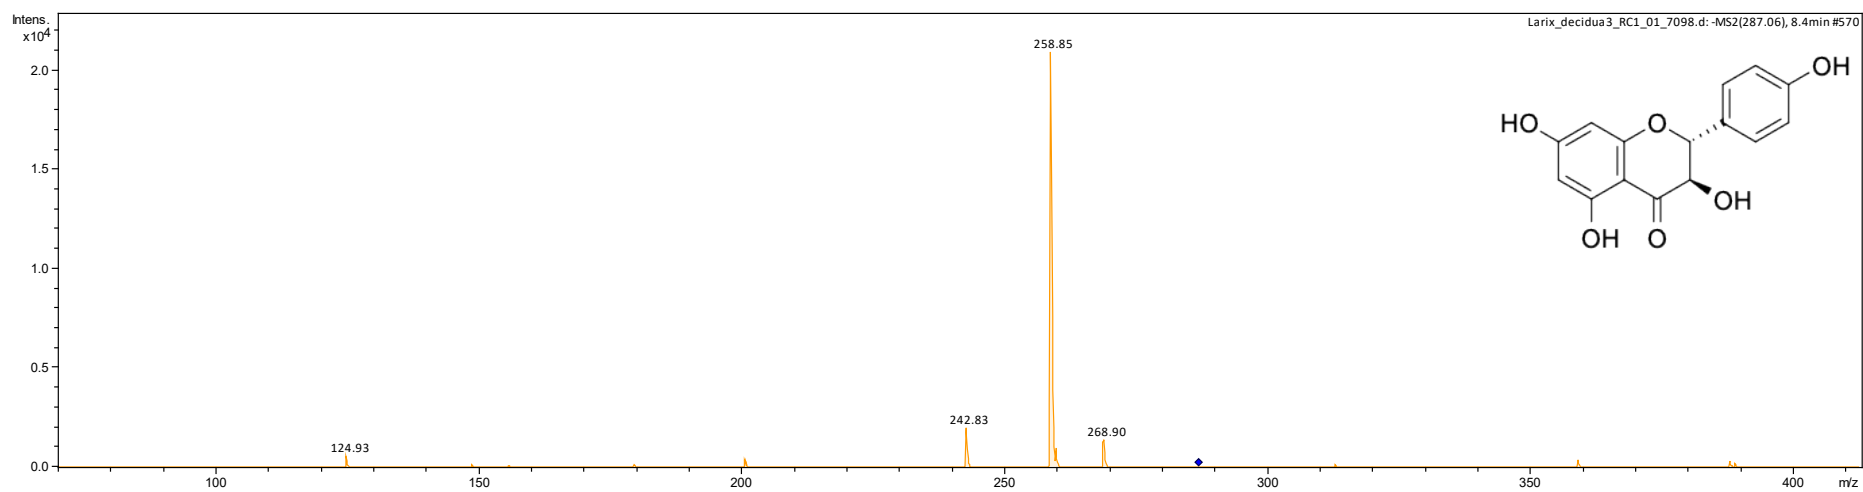

**Figure S34.** ESI-MS<sup>2</sup> spectrum (negative ion mode) of molecular ion at  $m/z$  287 – compound (11).

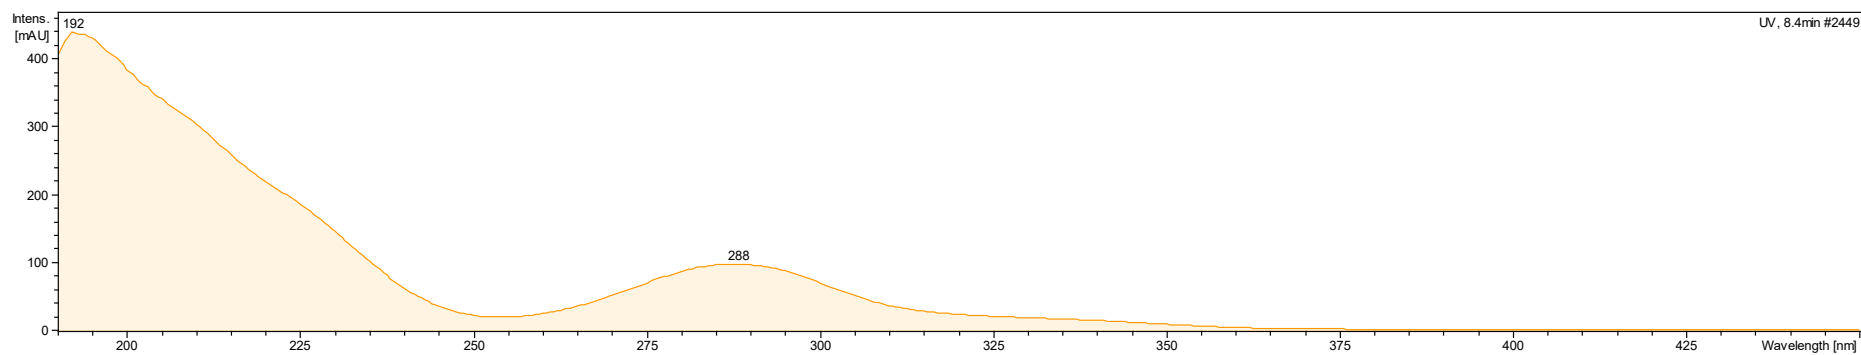

**Figure S35.** UV spectrum of compound (11).

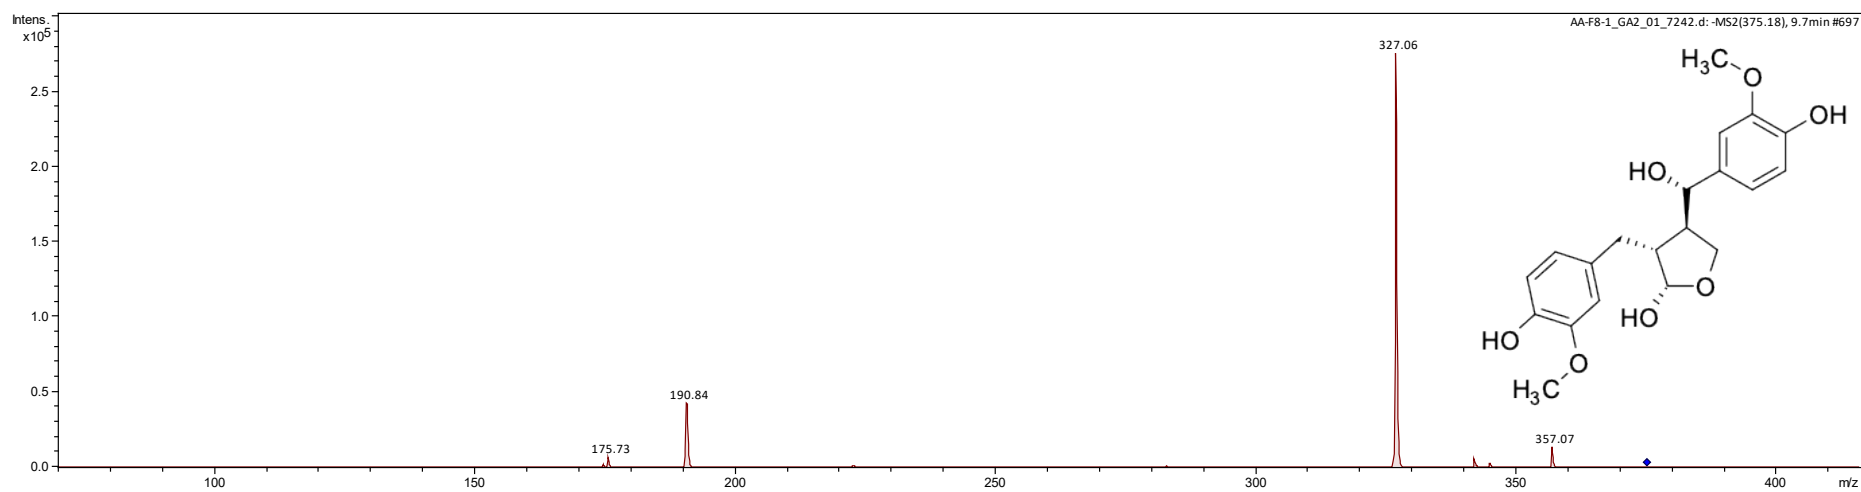

**Figure S36.** ESI-MS<sup>2</sup> spectrum (negative ion mode) of molecular ion at  $m/z$  375 – compound (12).

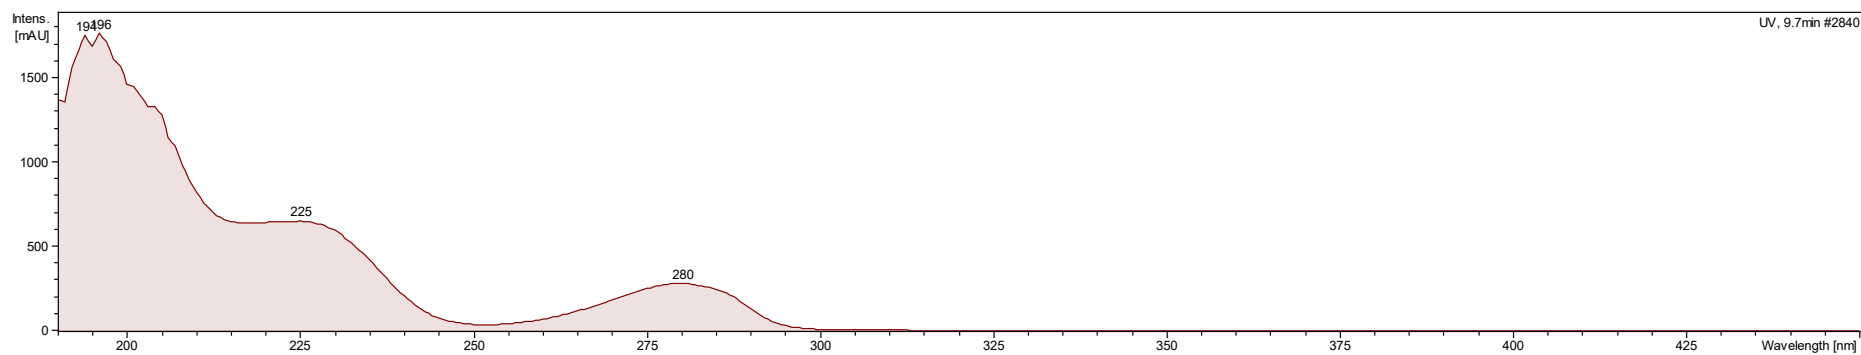

**Figure S37.** UV spectrum of compound (12).

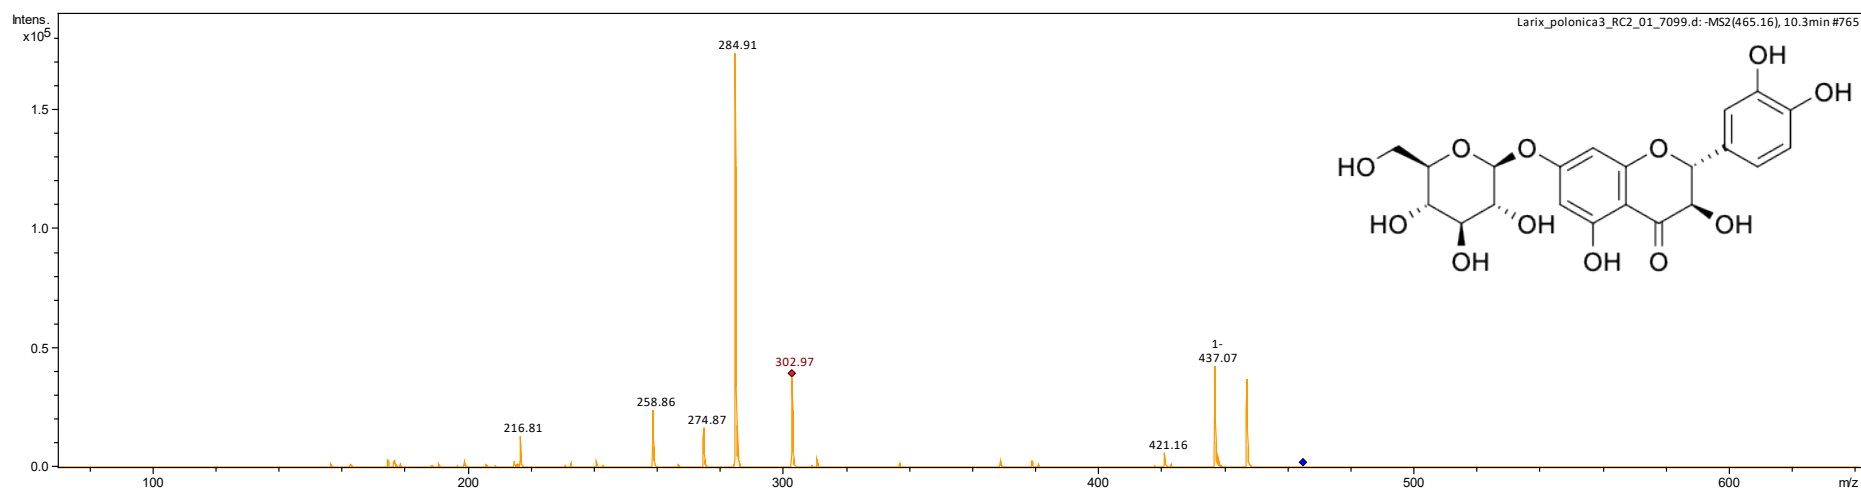

**Figure S38.** ESI-MS<sup>2</sup> spectrum (negative ion mode) of molecular ion at m/z 465 – compound (13).



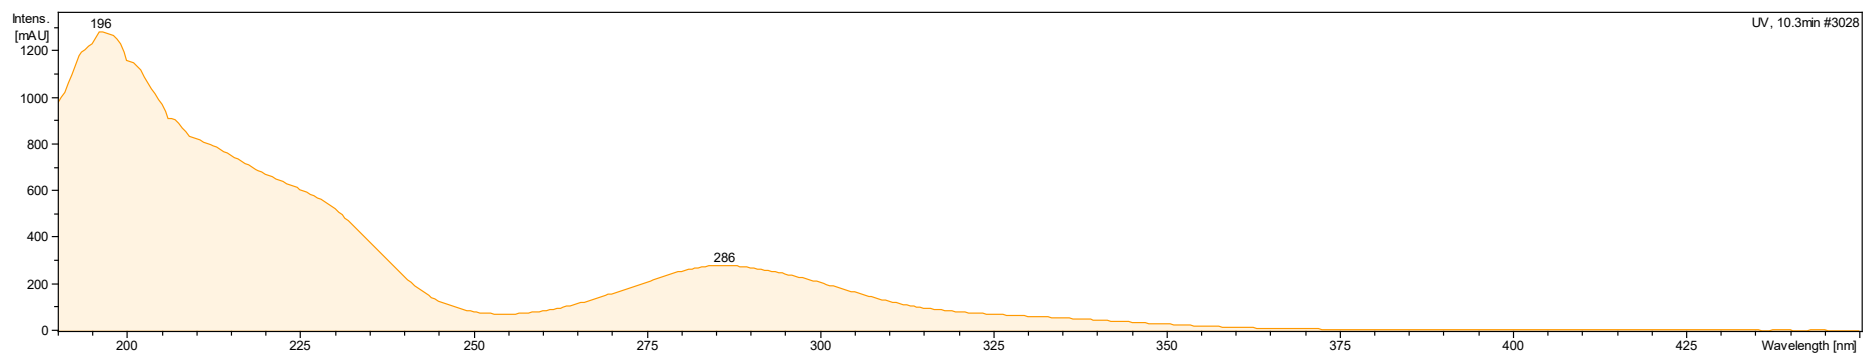

**Figure S39.** UV spectrum of compound (13).

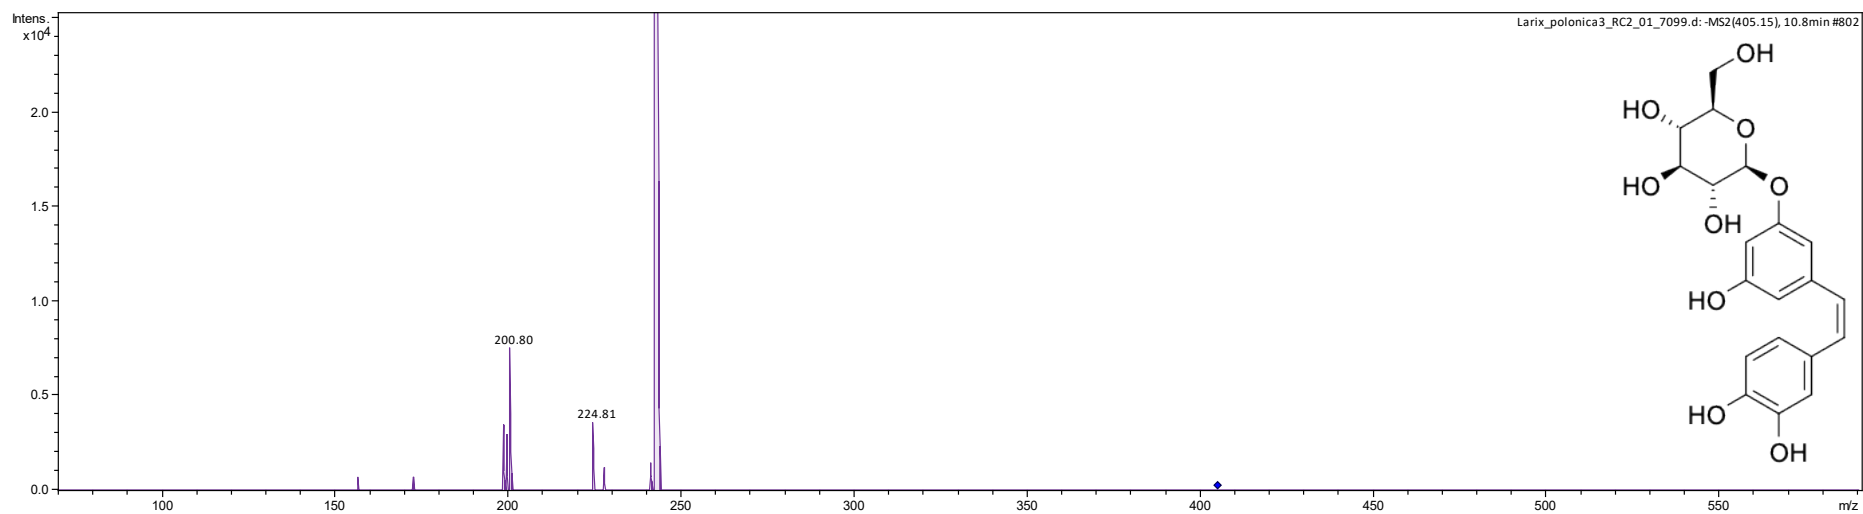

**Figure S40.** ESI-MS<sup>2</sup> spectrum (negative ion mode) of molecular ion at  $m/z$  405 – compound (14).

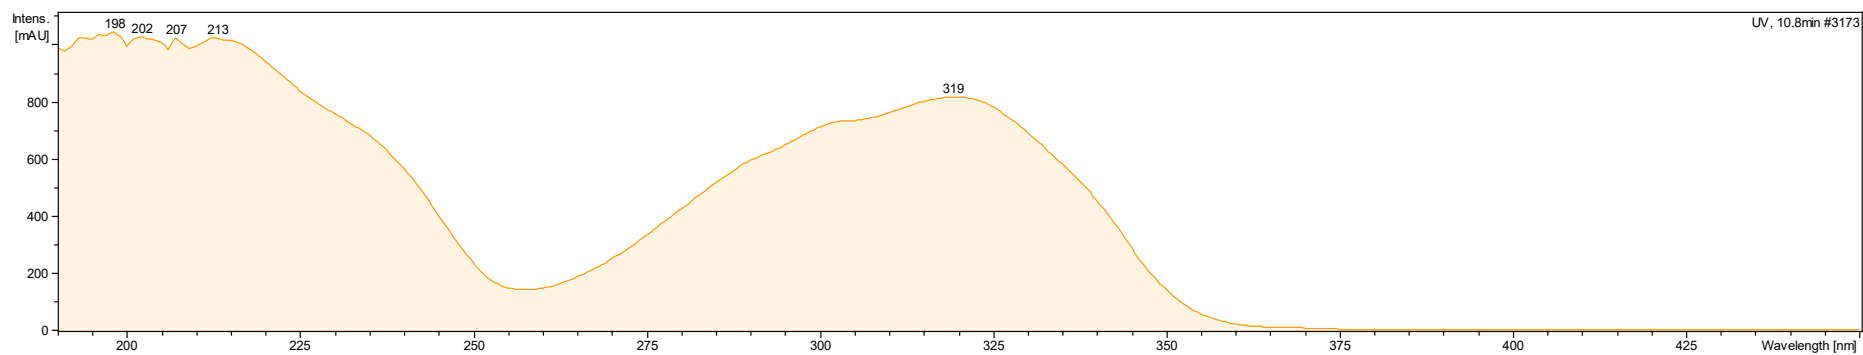

**Figure S41.** UV spectrum of compound (14).

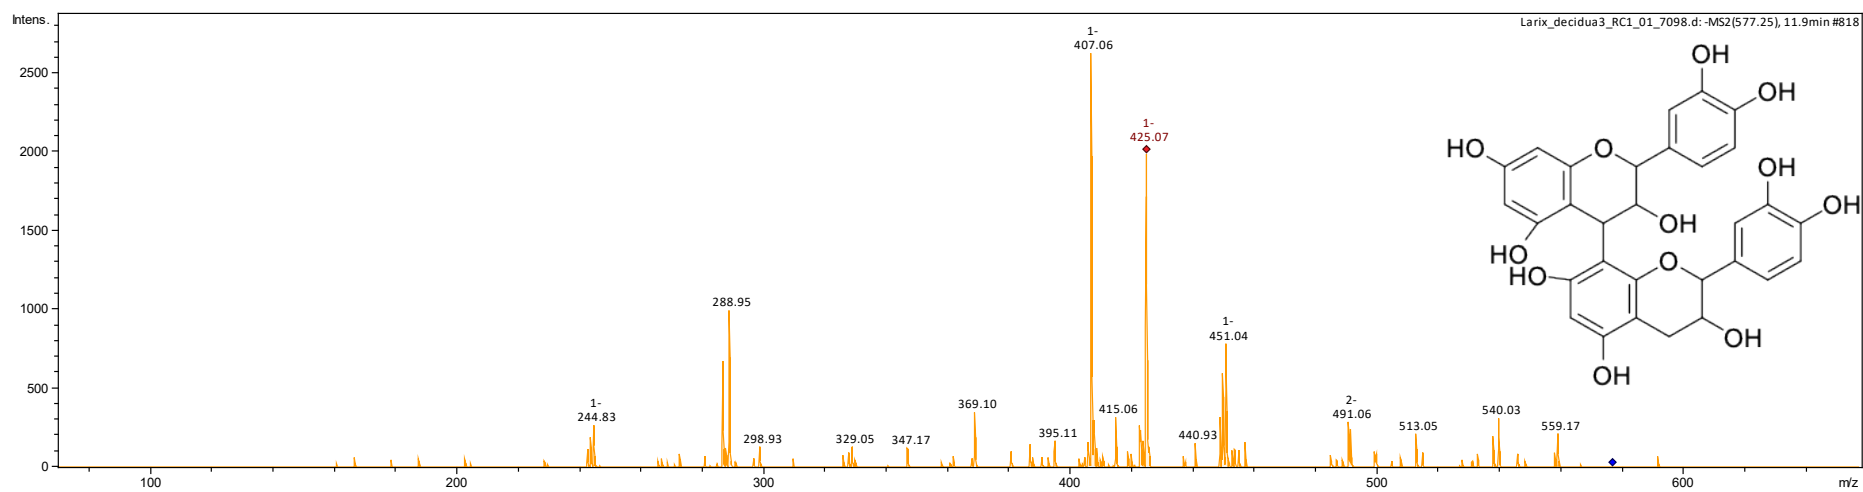

**Figure S42.** ESI-MS<sup>2</sup> spectrum (negative ion mode) of molecular ion at  $m/z$  577 – compound (15).

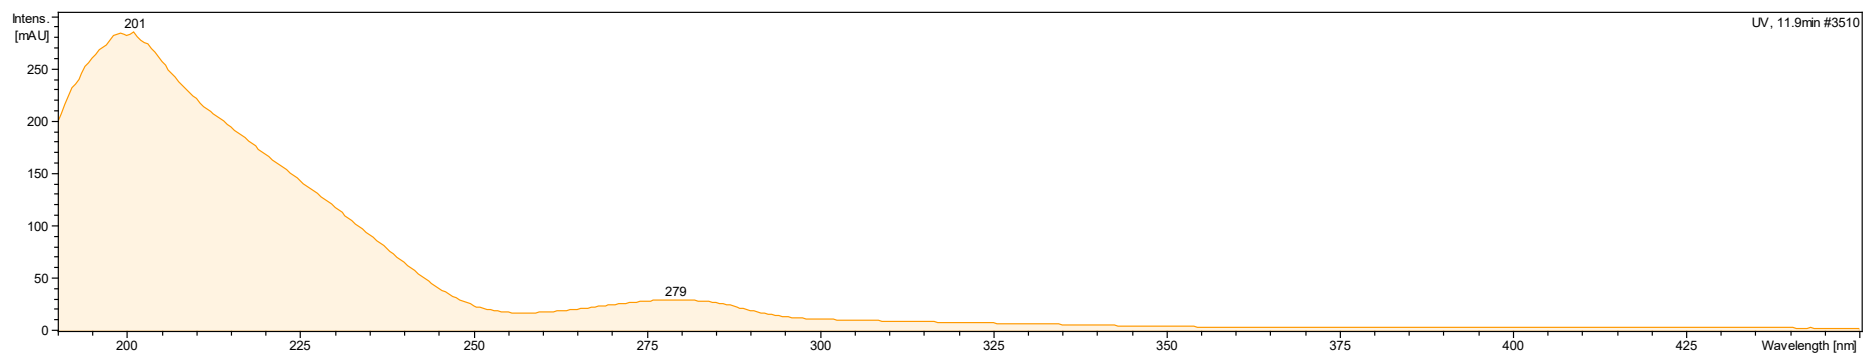

**Figure S43.** UV spectrum of compound (15).

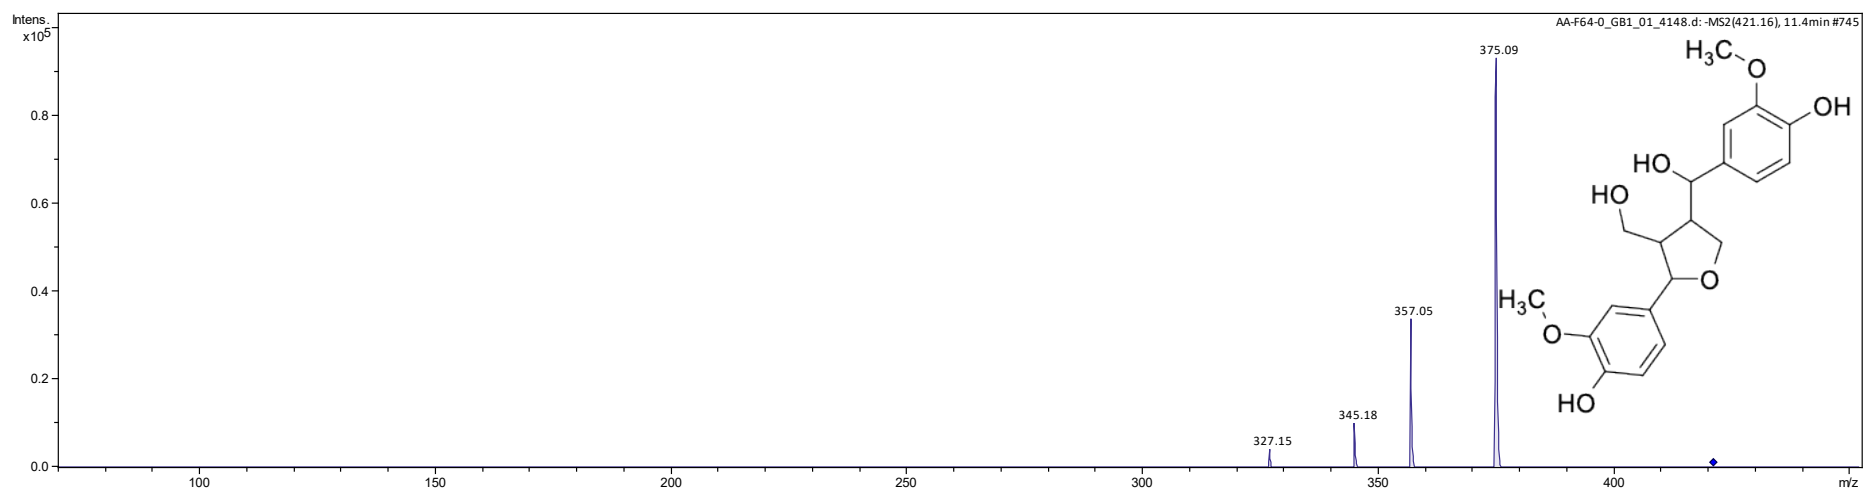

**Figure S44.** ESI-MS<sup>2</sup> spectrum (negative ion mode) of molecular ion at m/z 421 – compound (16).

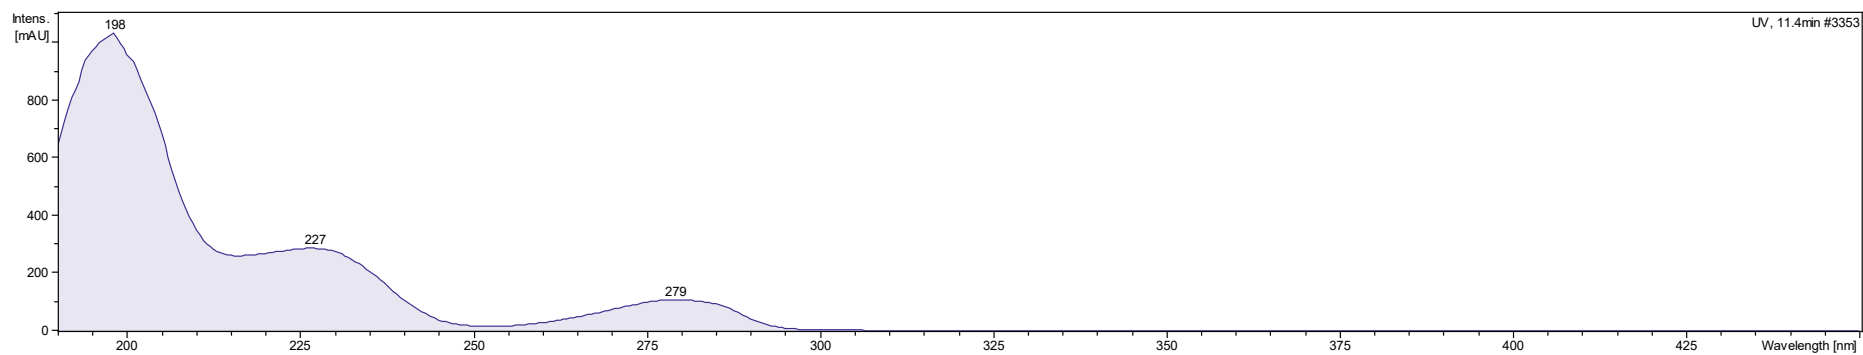

**Figure S45.** UV spectrum of compound (16).

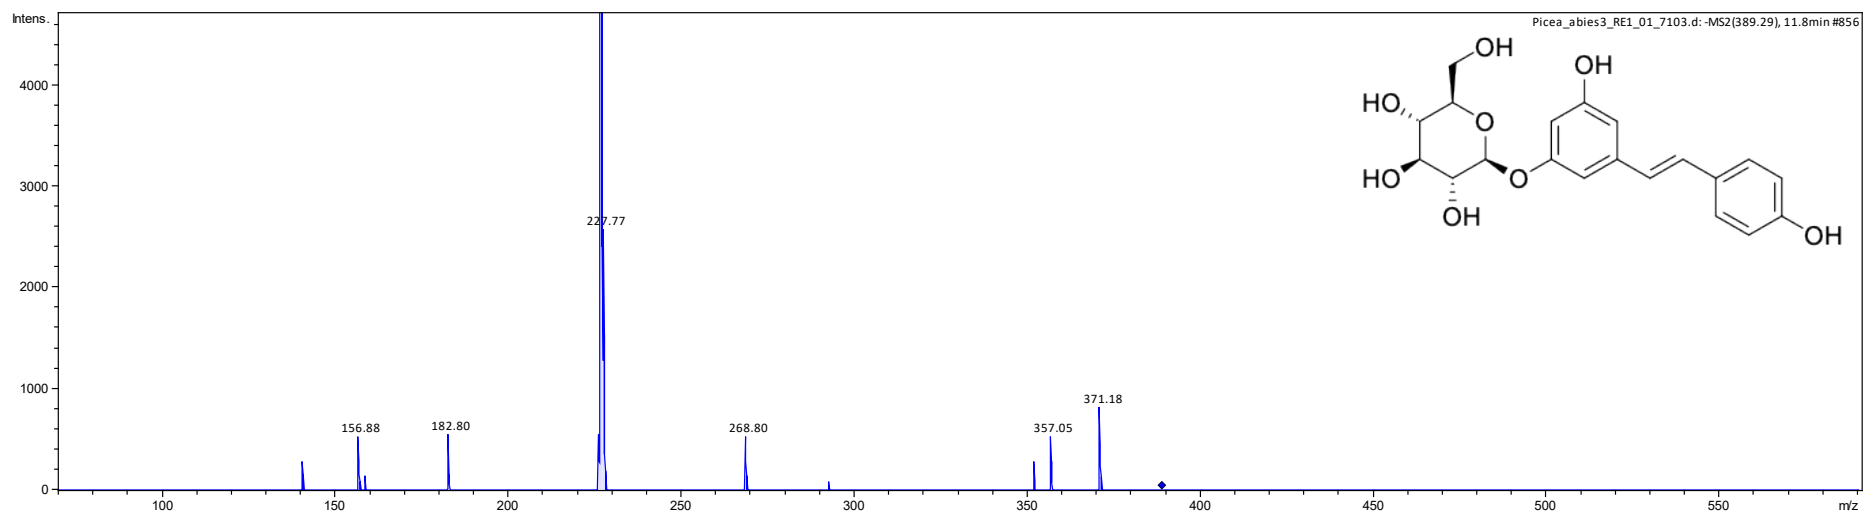

**Figure S46.** ESI-MS<sup>2</sup> spectrum (negative ion mode) of molecular ion at  $m/z$  389 – compound (17).

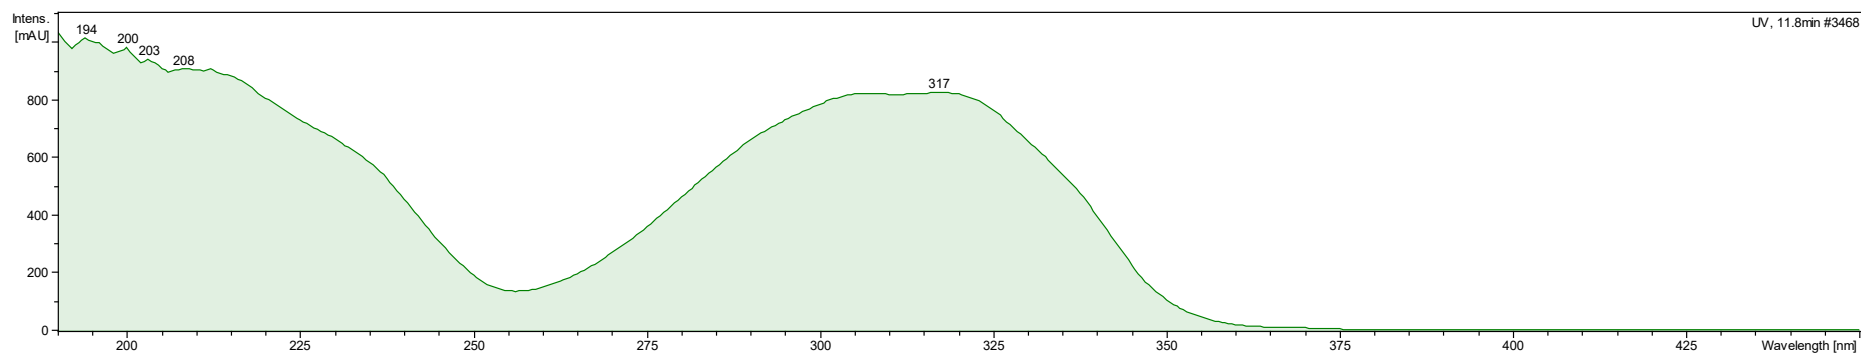

**Figure S47.** UV spectrum of compound (17).

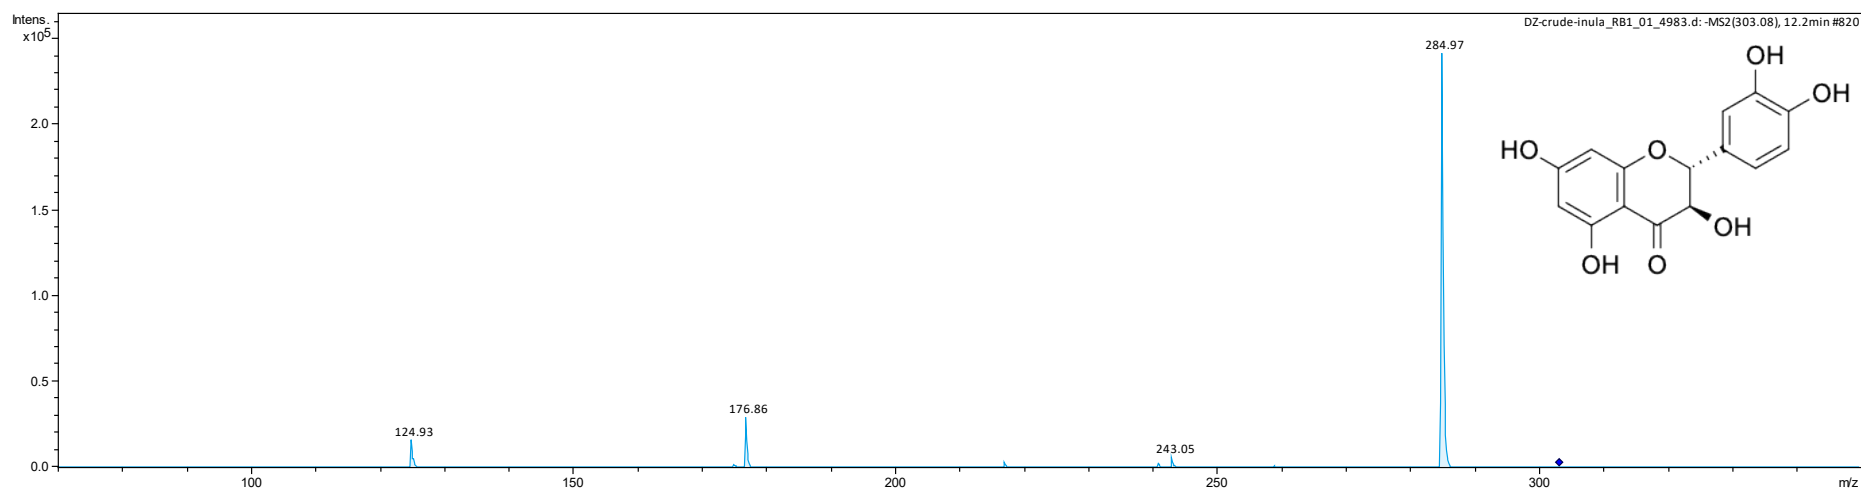

**Figure S48.** ESI-MS<sup>2</sup> spectrum (negative ion mode) of molecular ion at  $m/z$  303 – compound (18).

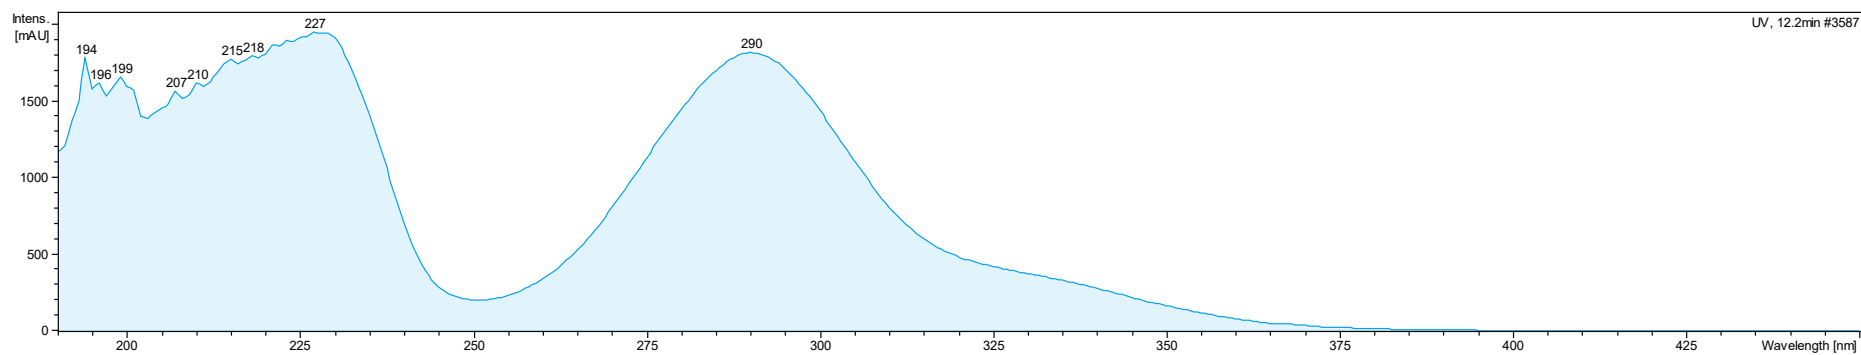

**Figure S49.** UV spectrum of compound (18).

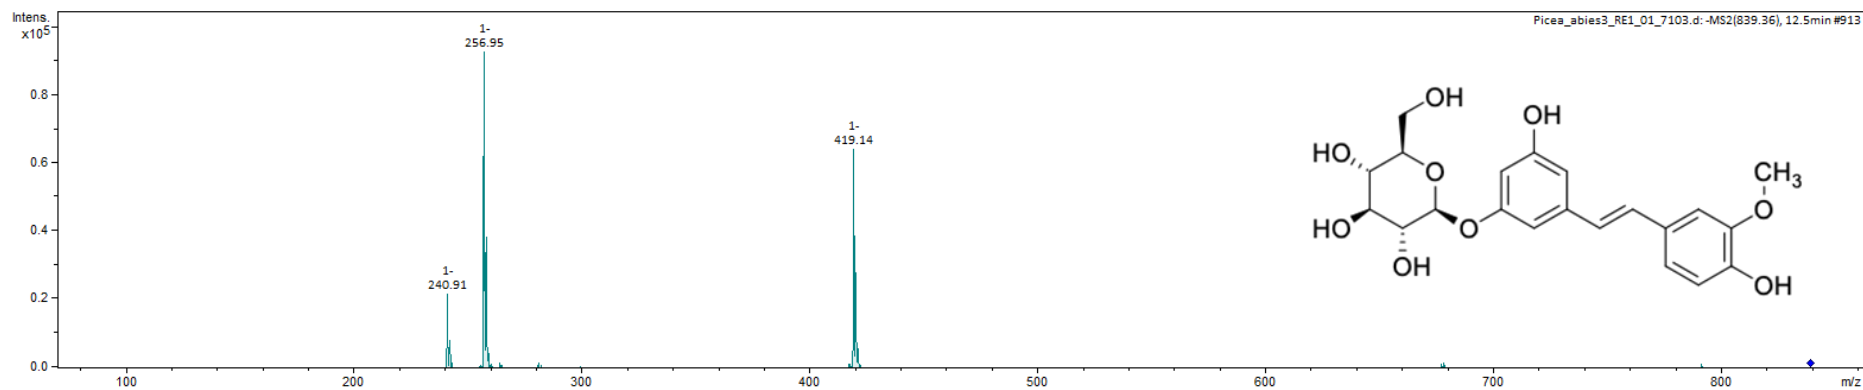

**Figure S50.** ESI-MS<sup>2</sup> spectrum (negative ion mode) of molecular ion at  $m/z$  465 – compound (19).

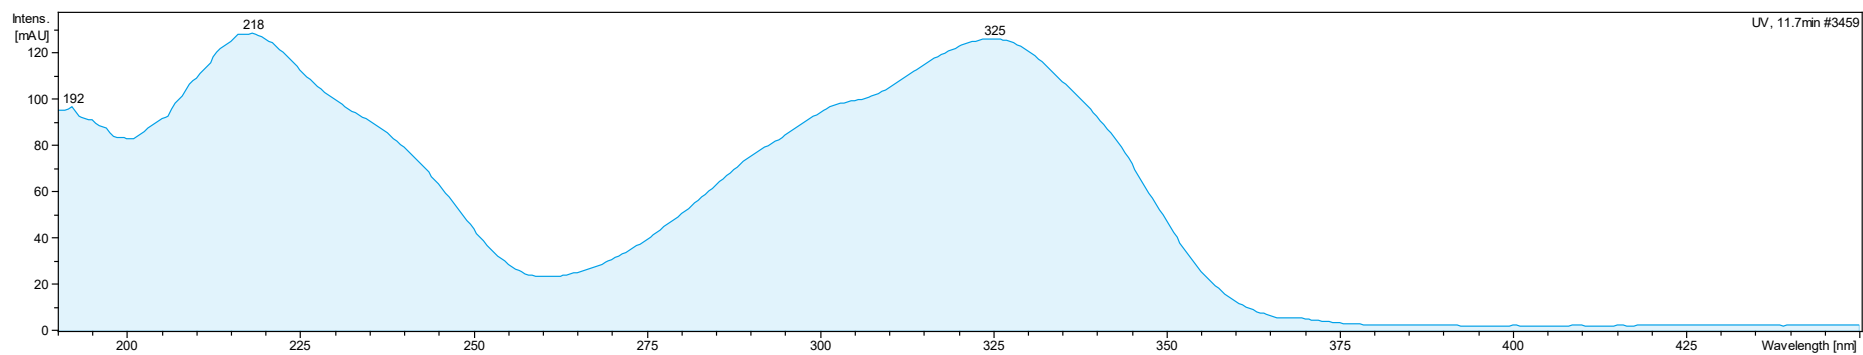

**Figure S51.** UV spectrum of compound (19).

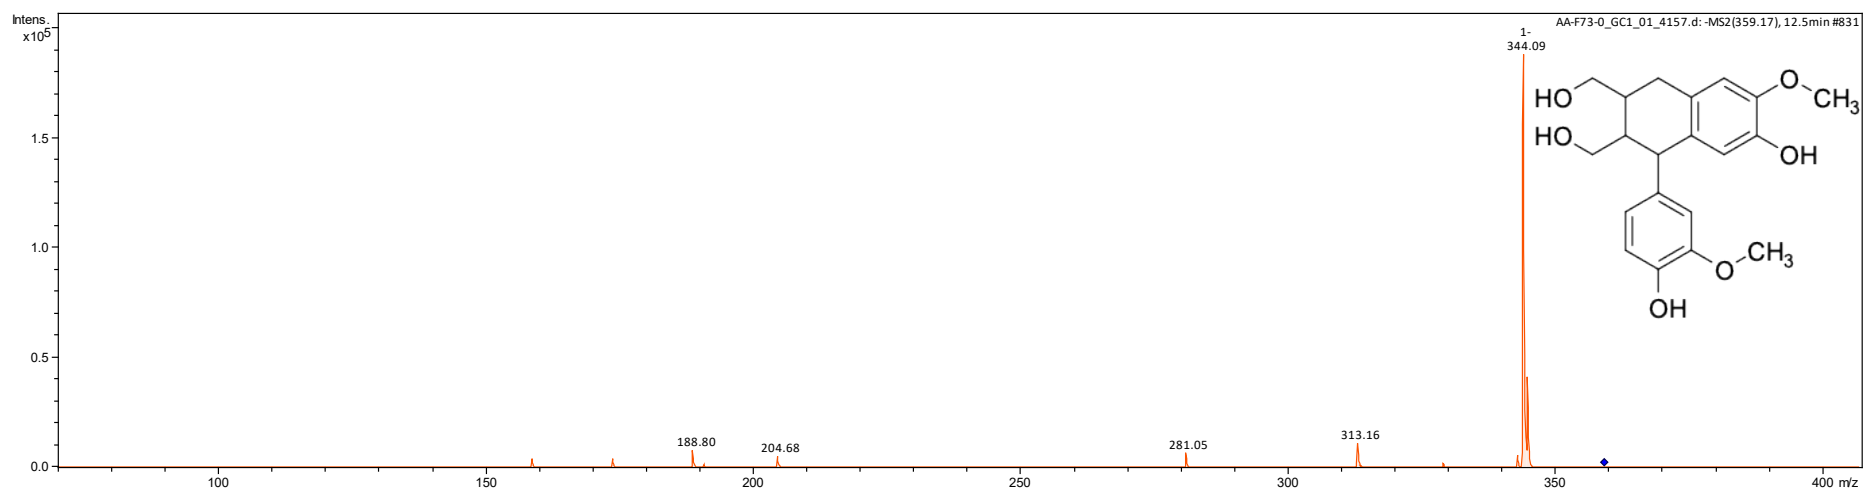

**Figure S52.** ESI-MS<sup>2</sup> spectrum (negative ion mode) of molecular ion at  $m/z$  359 – compound (20).

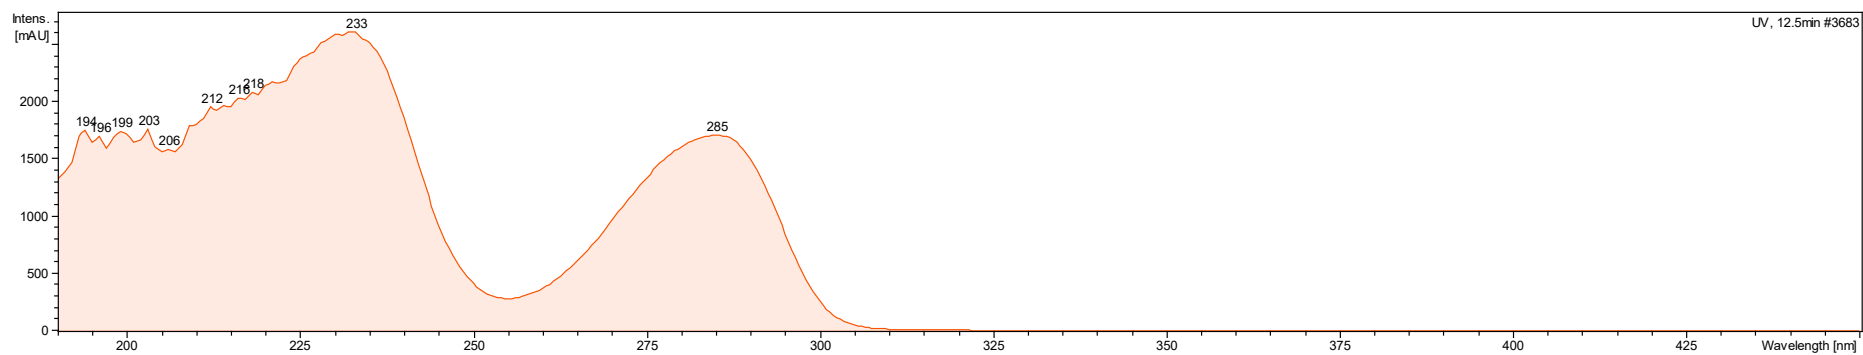

**Figure S53.** UV spectrum of compound (20).

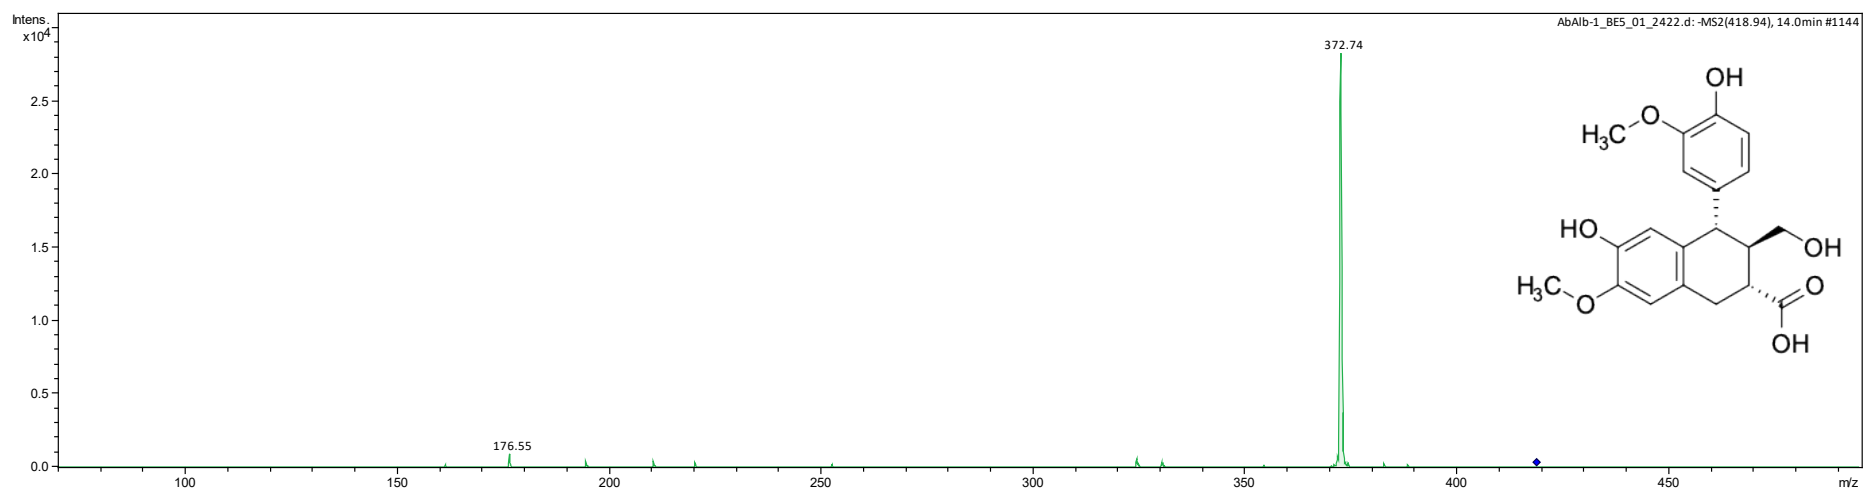

**Figure S54.** ESI-MS<sup>2</sup> spectrum (negative ion mode) of molecular ion at  $m/z$  419 – compound (21).



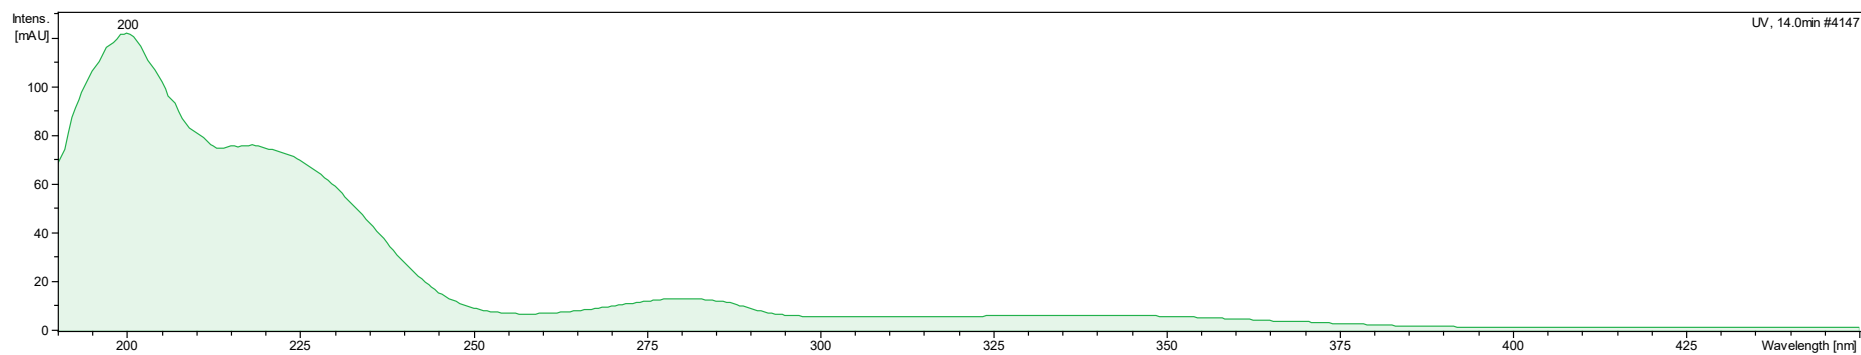

**Figure S55.** UV spectrum of compound (21).

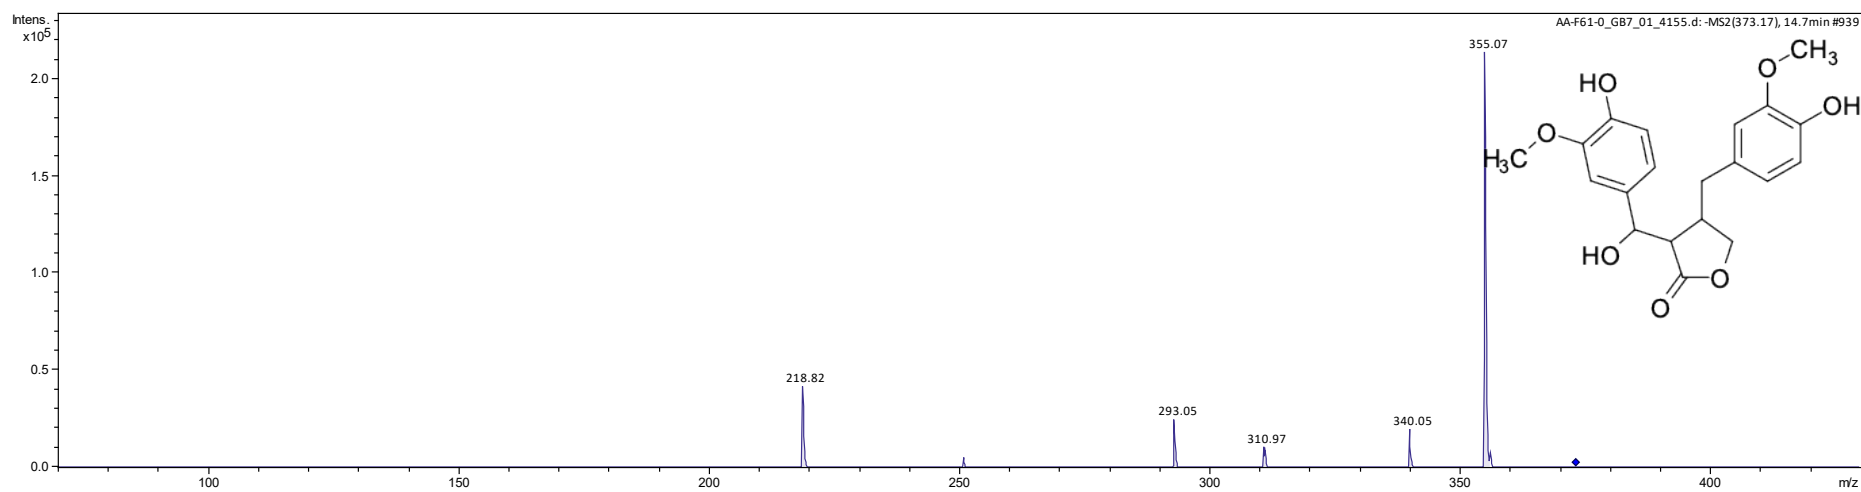

**Figure S56.** ESI-MS<sup>2</sup> spectrum (negative ion mode) of molecular ion at  $m/z$  373 – compound (22).

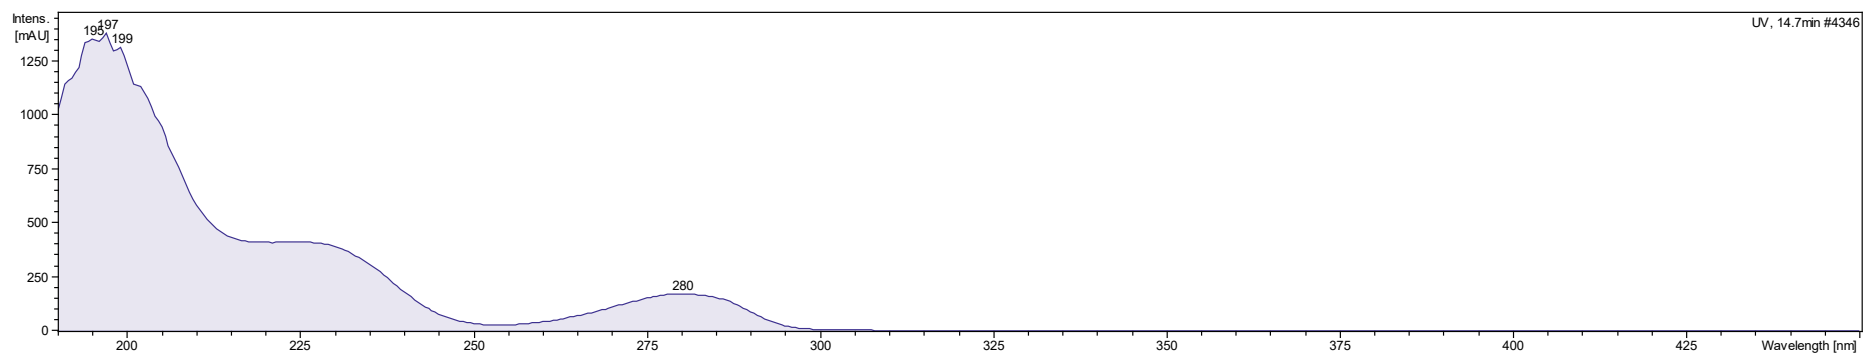

**Figure S57.** UV spectrum of compound (22).

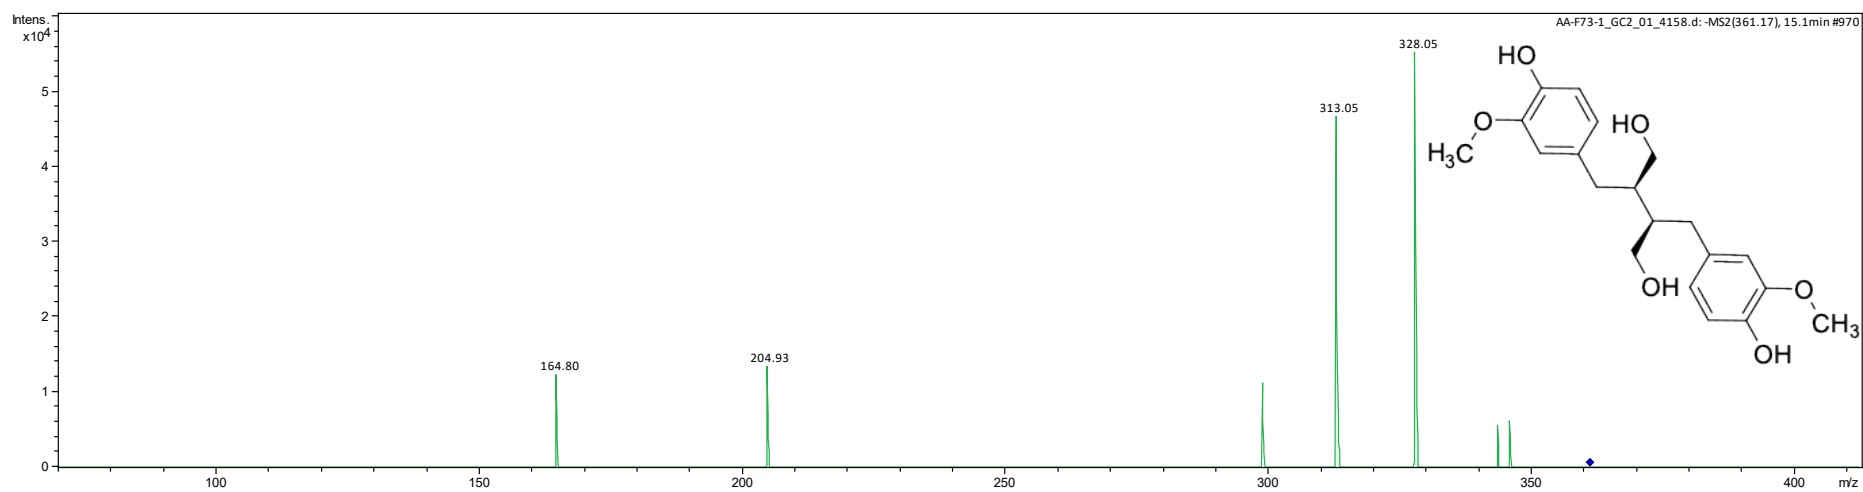

**Figure S58.** ESI-MS<sup>2</sup> spectrum (negative ion mode) of molecular ion at  $m/z$  361 – compound (23).

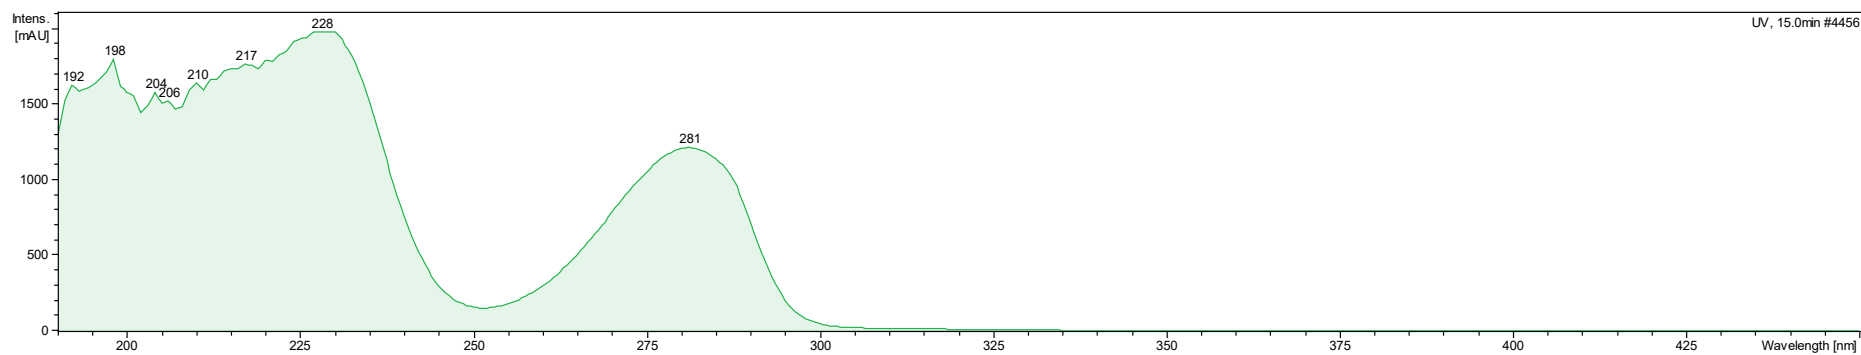

**Figure S59.** UV spectrum of compound (23).

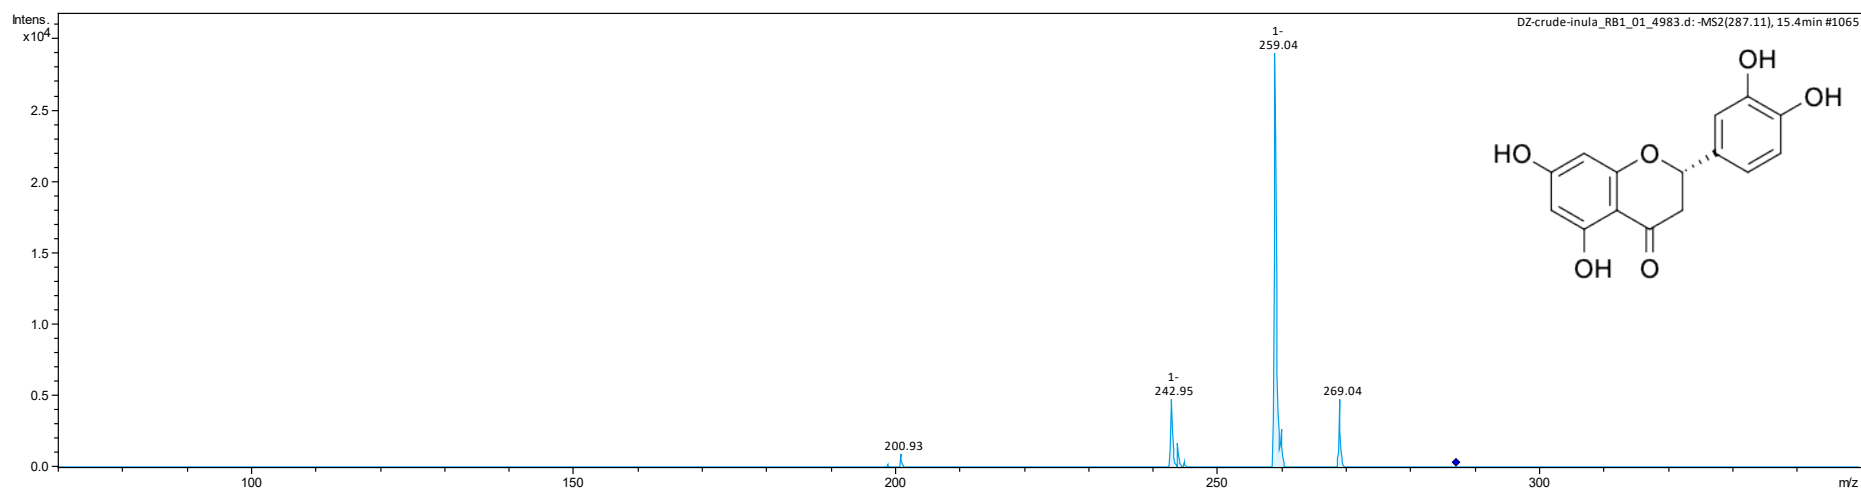

**Figure S60.** ESI-MS<sup>2</sup> spectrum (negative ion mode) of molecular ion at  $m/z$  287 – compound (24).

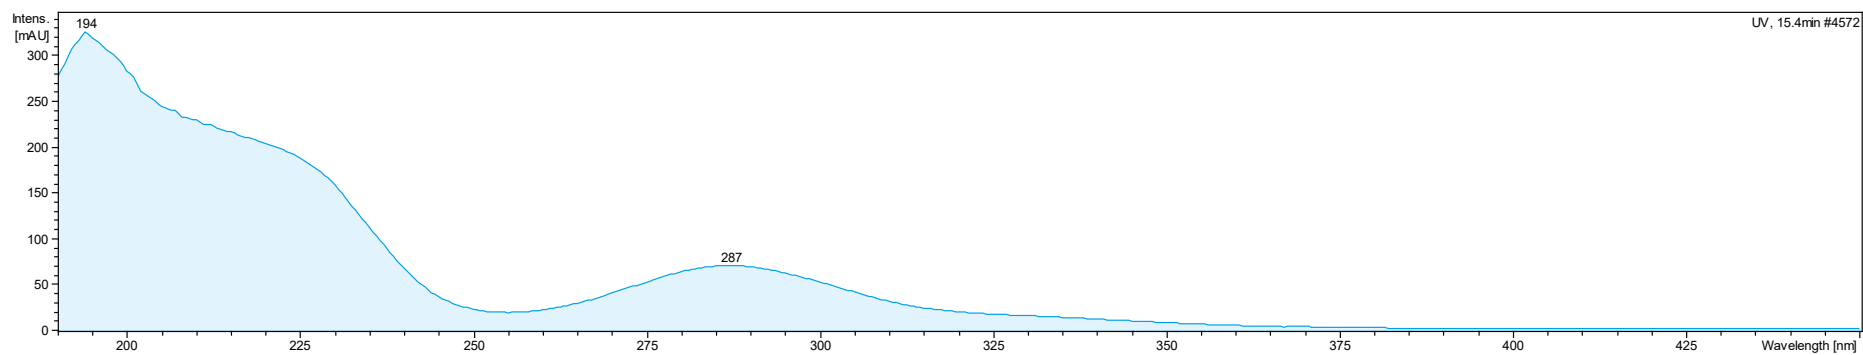

**Figure S61.** UV spectrum of compound (24).

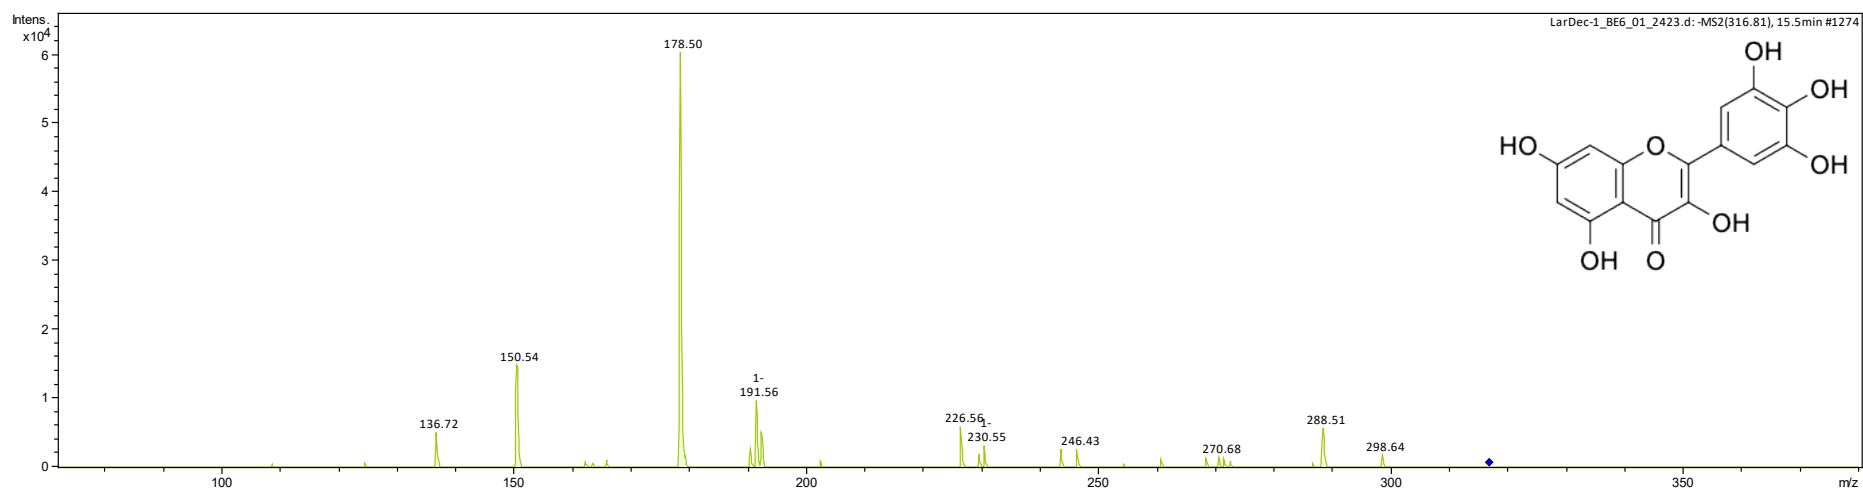

**Figure S62.** ESI-MS<sup>2</sup> spectrum (negative ion mode) of molecular ion at  $m/z$  317 – compound (25).

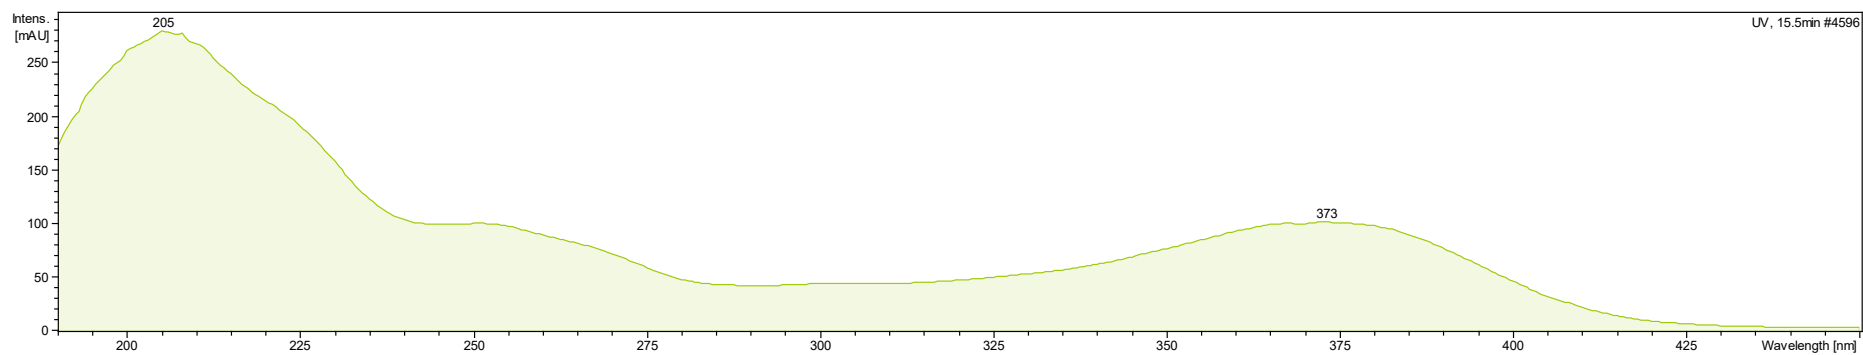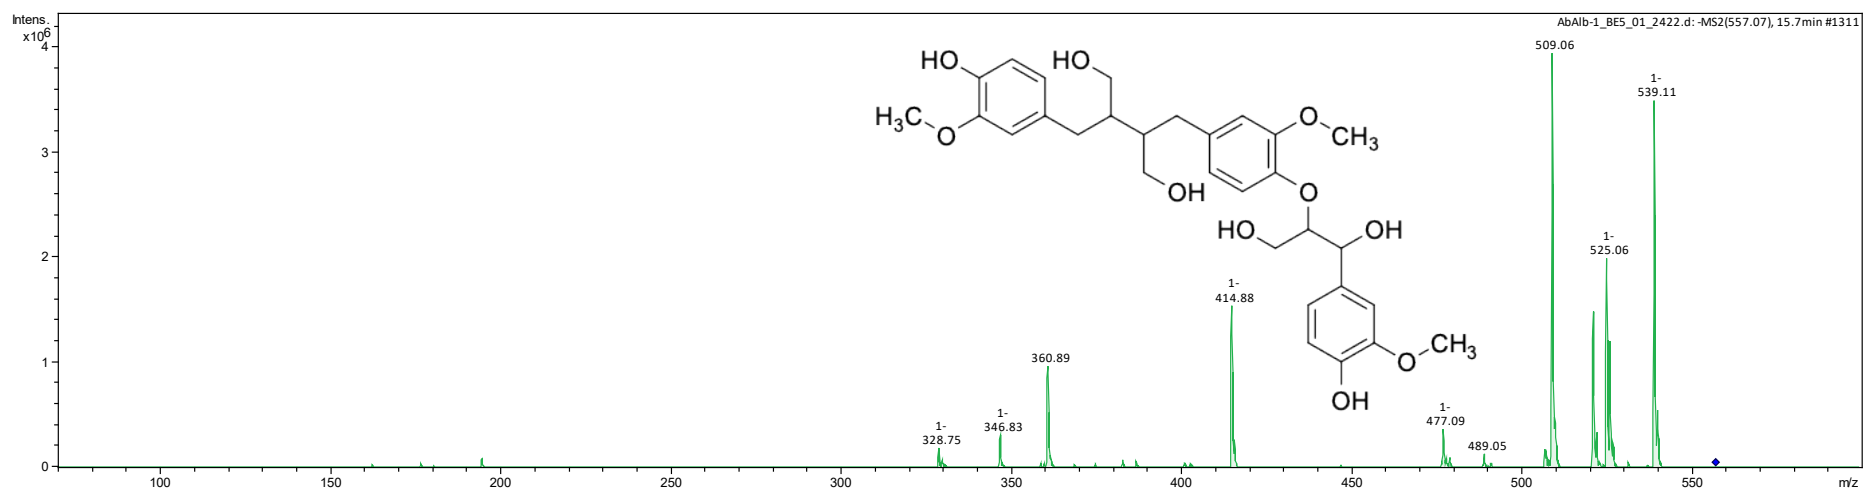

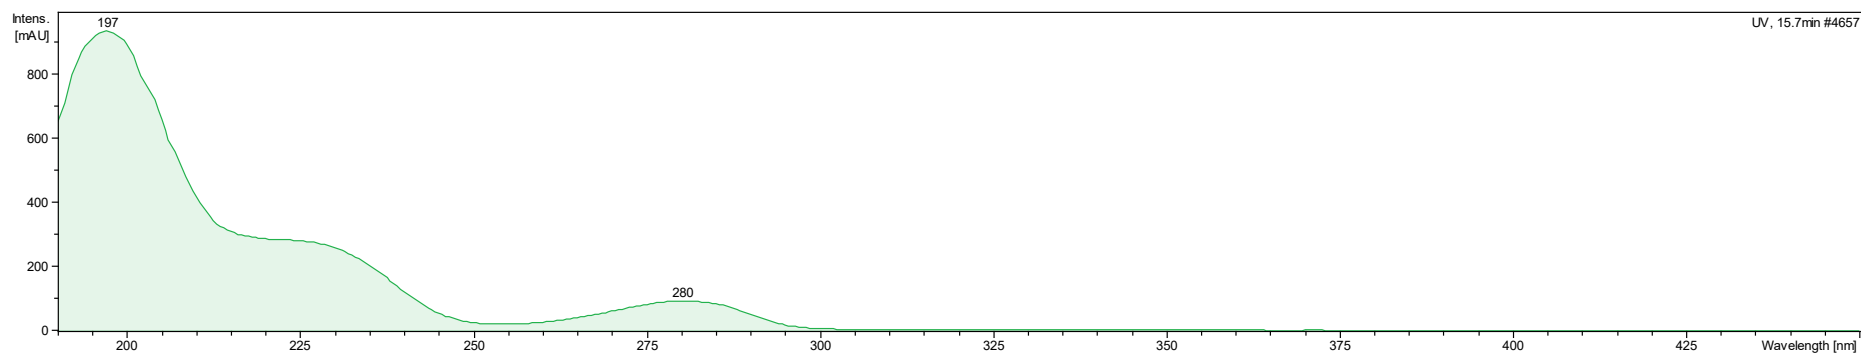

**Figure S65.** UV spectrum of compound (26).

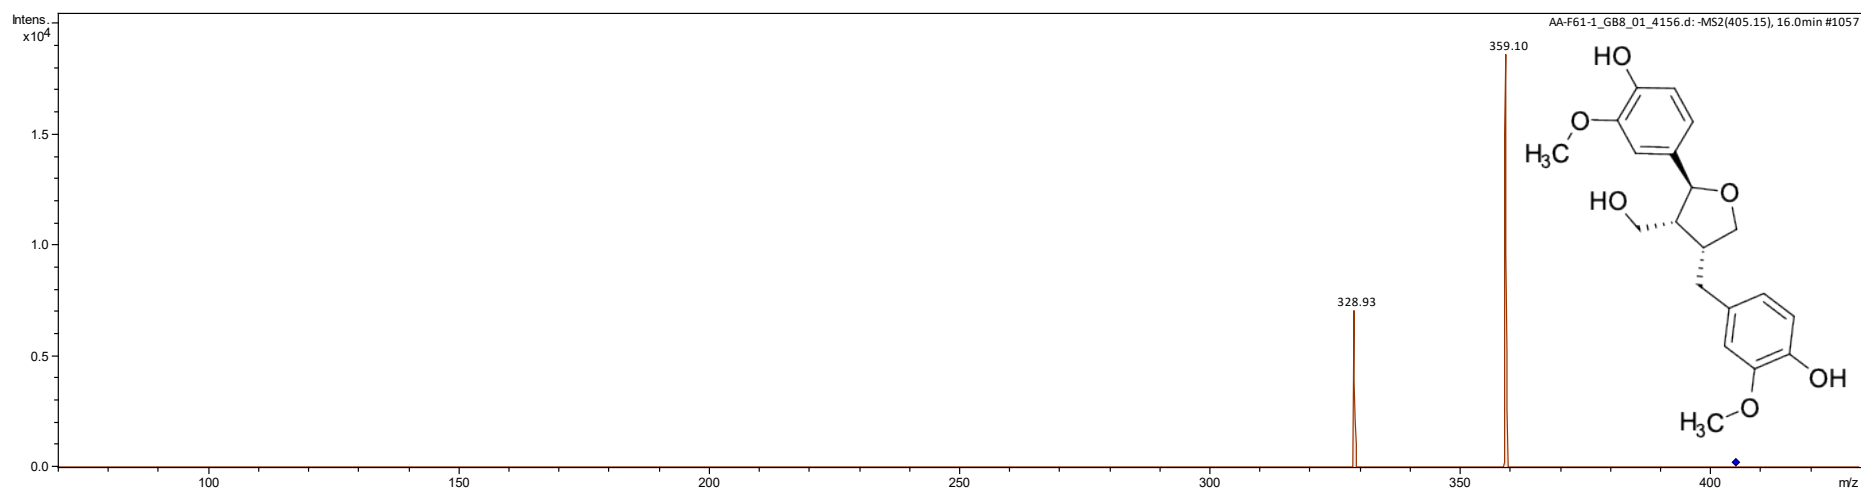

**Figure S66.** ESI-MS<sup>2</sup> spectrum (negative ion mode) of molecular ion at m/z 405 – compound (27).

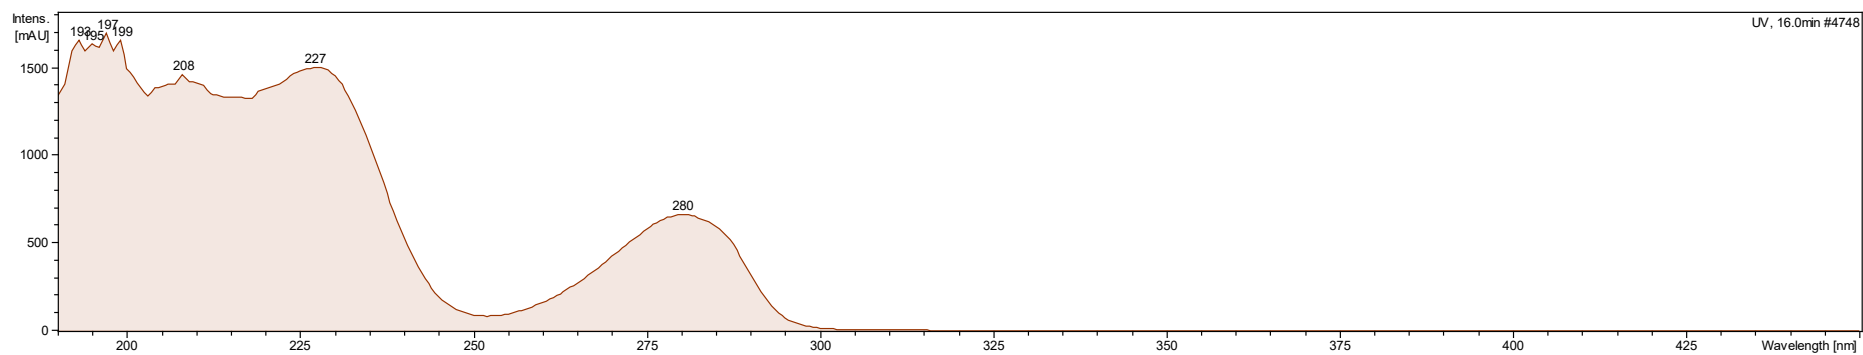

**Figure S67.** UV spectrum of compound (27).

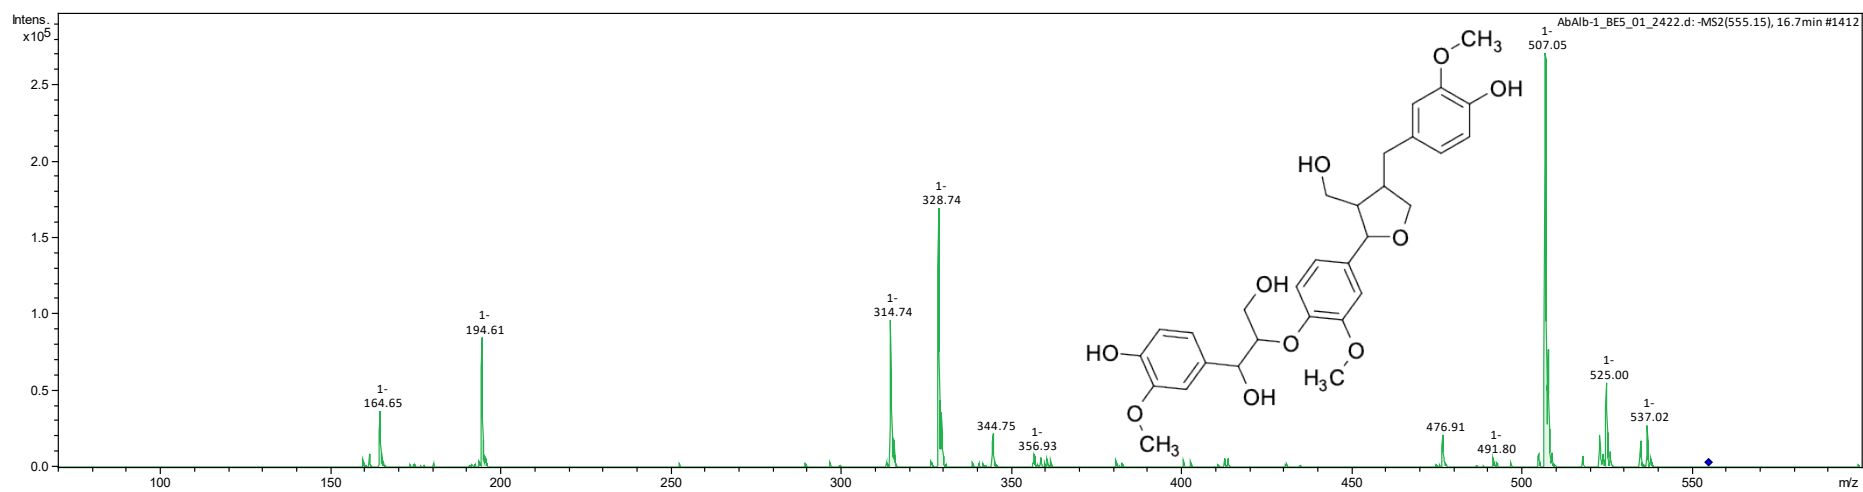

**Figure S68.** ESI-MS<sup>2</sup> spectrum (negative ion mode) of molecular ion at m/z 555 – compound (28).

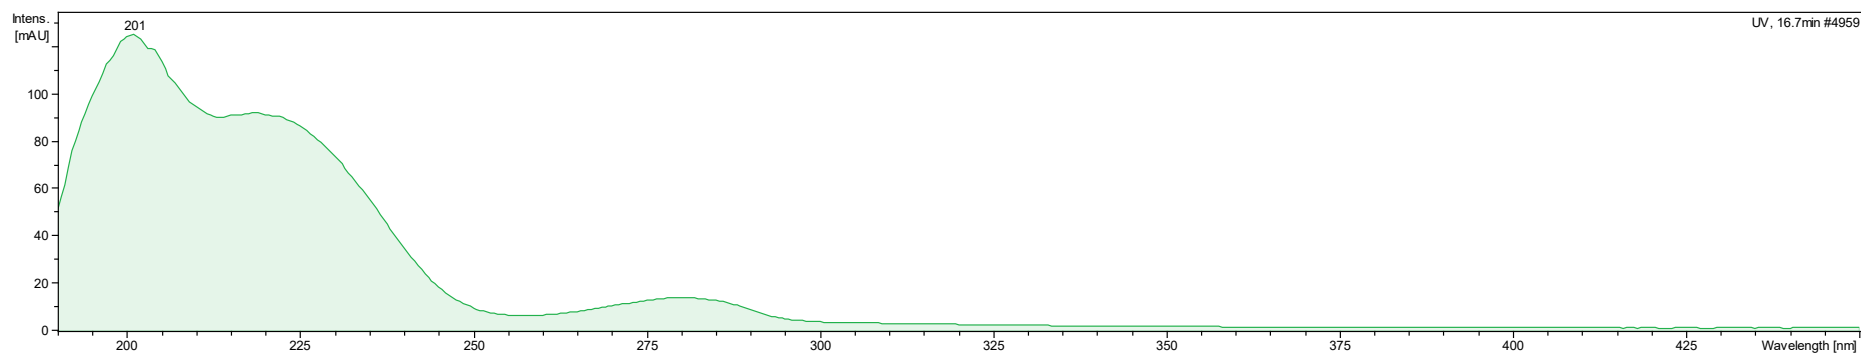

**Figure S69.** UV spectrum of compound (28).

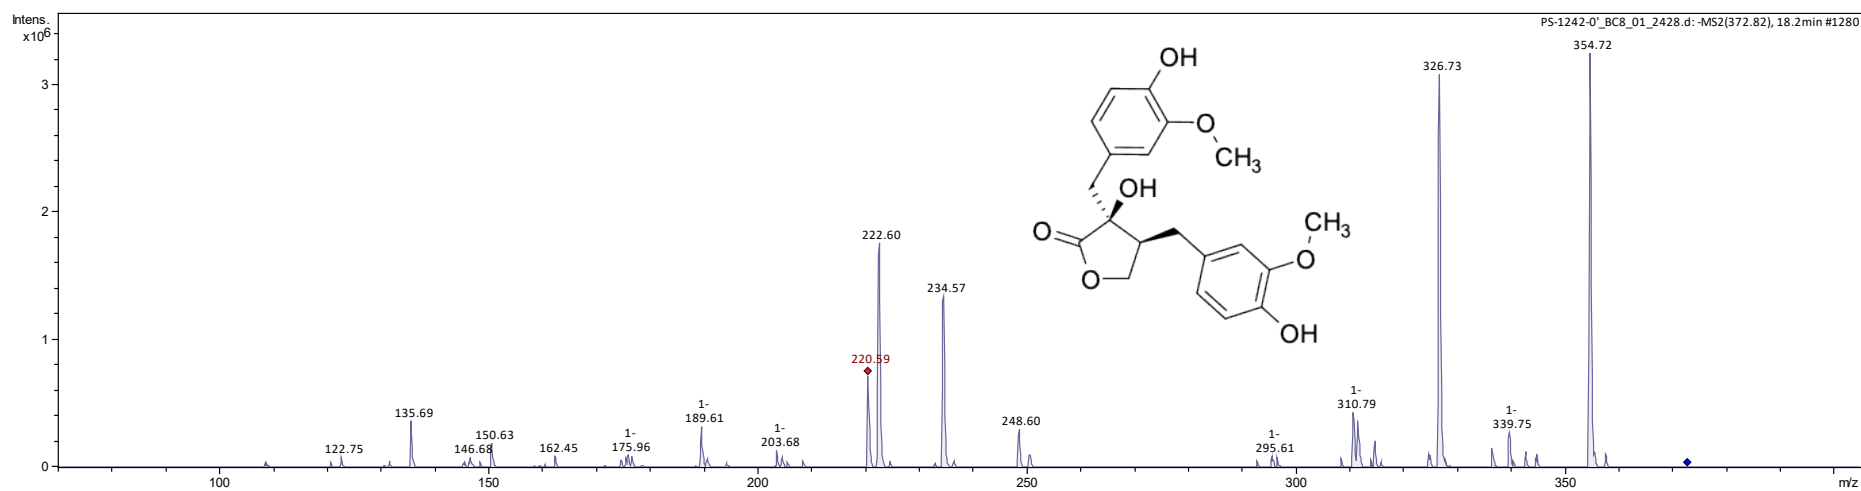

**Figure S70.** ESI-MS<sup>2</sup> spectrum (negative ion mode) of molecular ion at m/z 373 – compound (29).



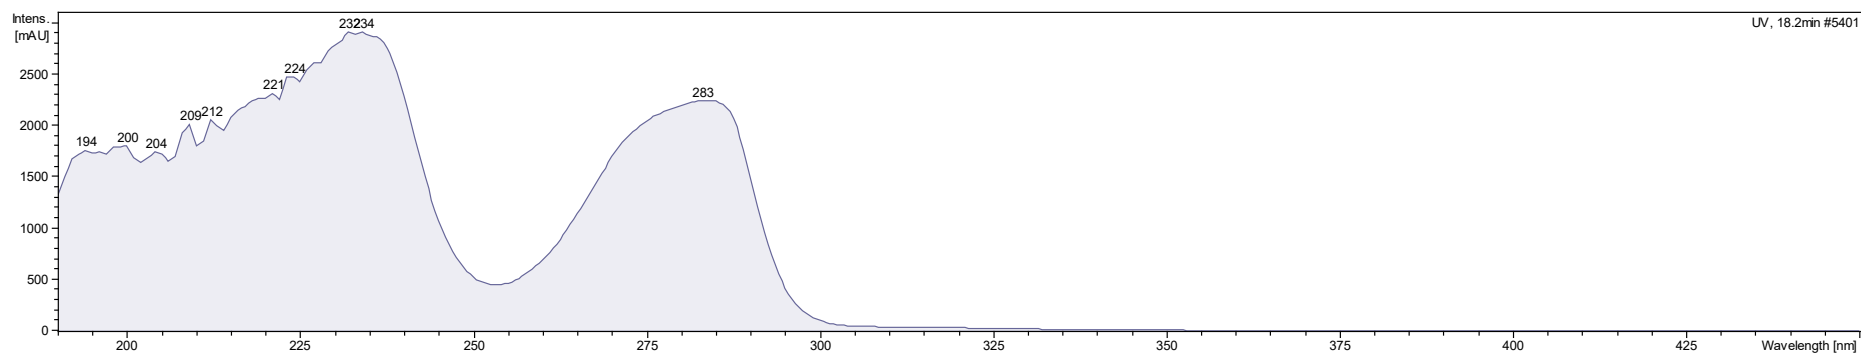

**Figure S71.** UV spectrum of compound (29).

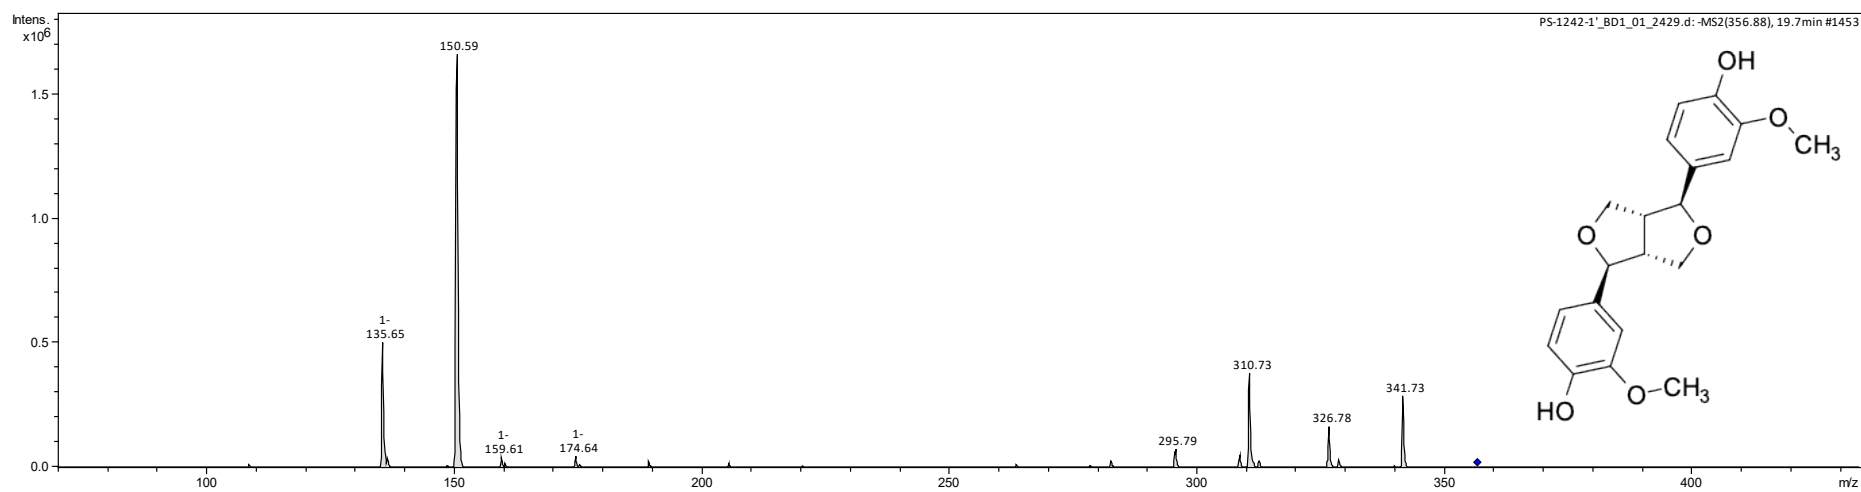

**Figure S72.** ESI-MS<sup>2</sup> spectrum (negative ion mode) of molecular ion at  $m/z$  357 – compound (30).

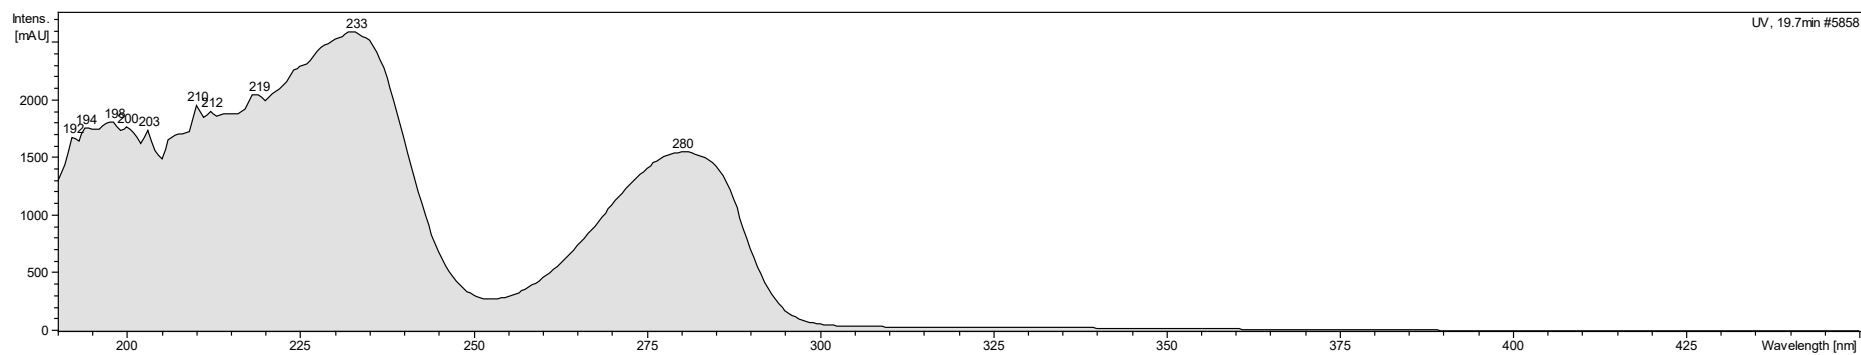

**Figure S73.** UV spectrum of compound (30).

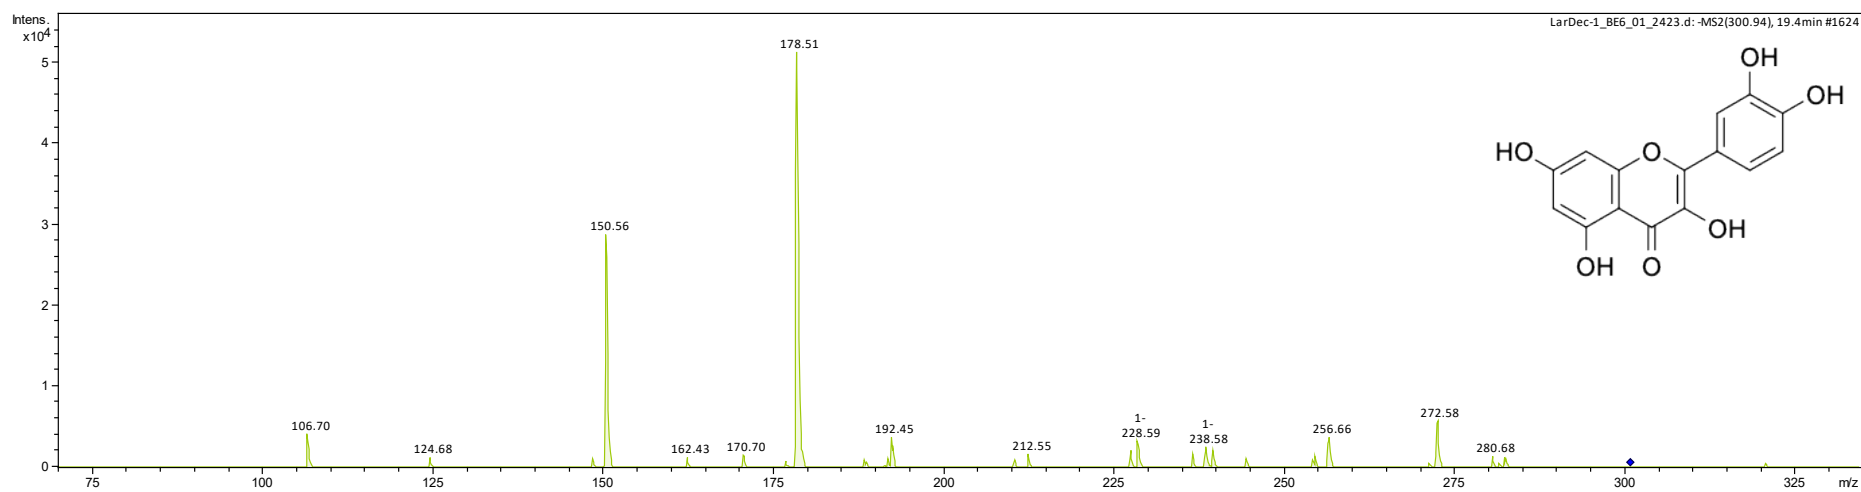

**Figure S74.** ESI-MS<sup>2</sup> spectrum (negative ion mode) of molecular ion at m/z 301 – compound (31).

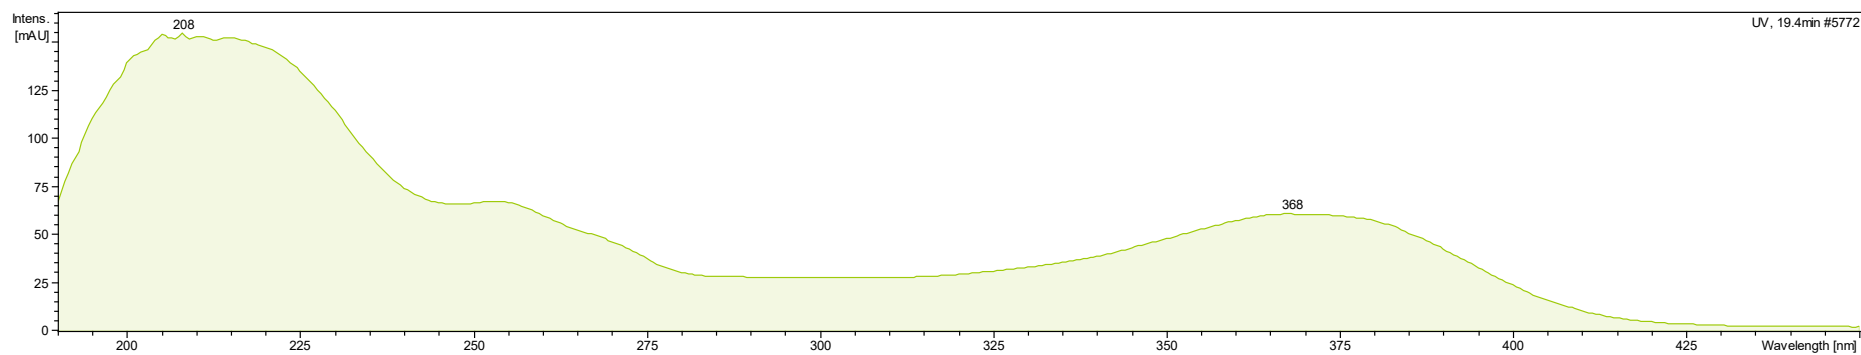

**Figure S75.** UV spectrum of compound (31).

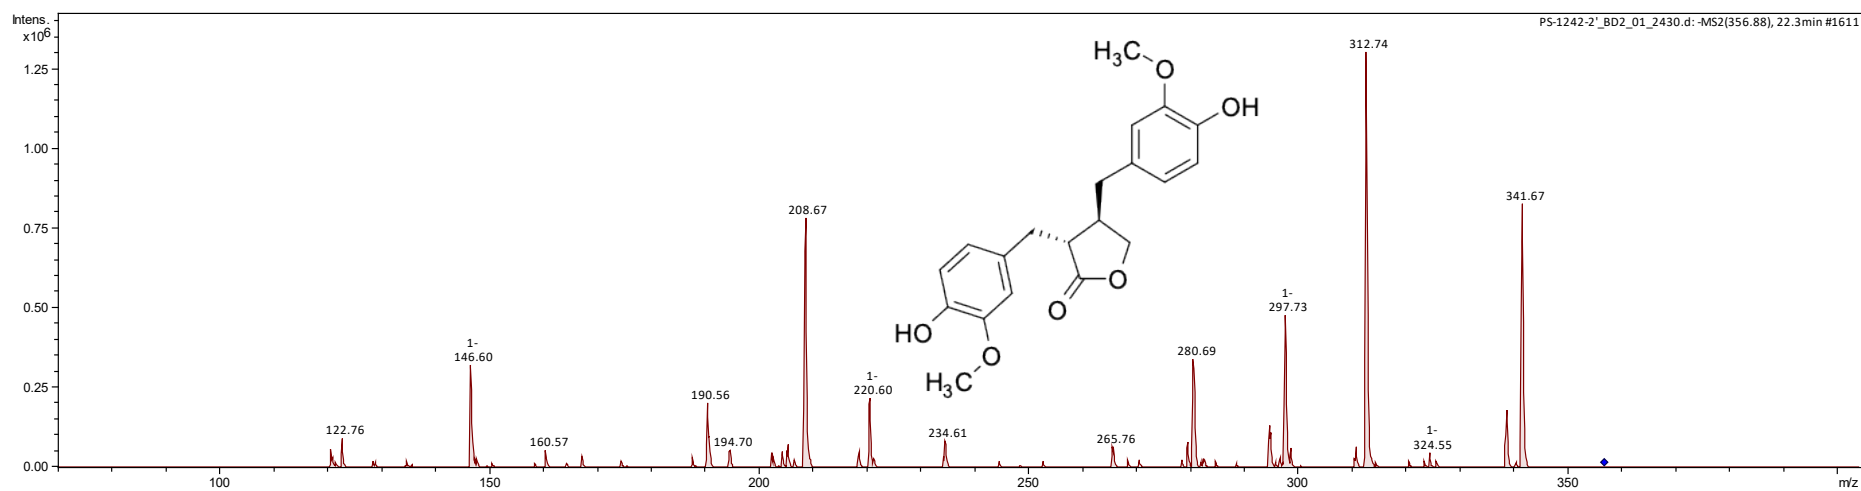

**Figure S76.** ESI-MS<sup>2</sup> spectrum (negative ion mode) of molecular ion at  $m/z$  357 – compound (32).

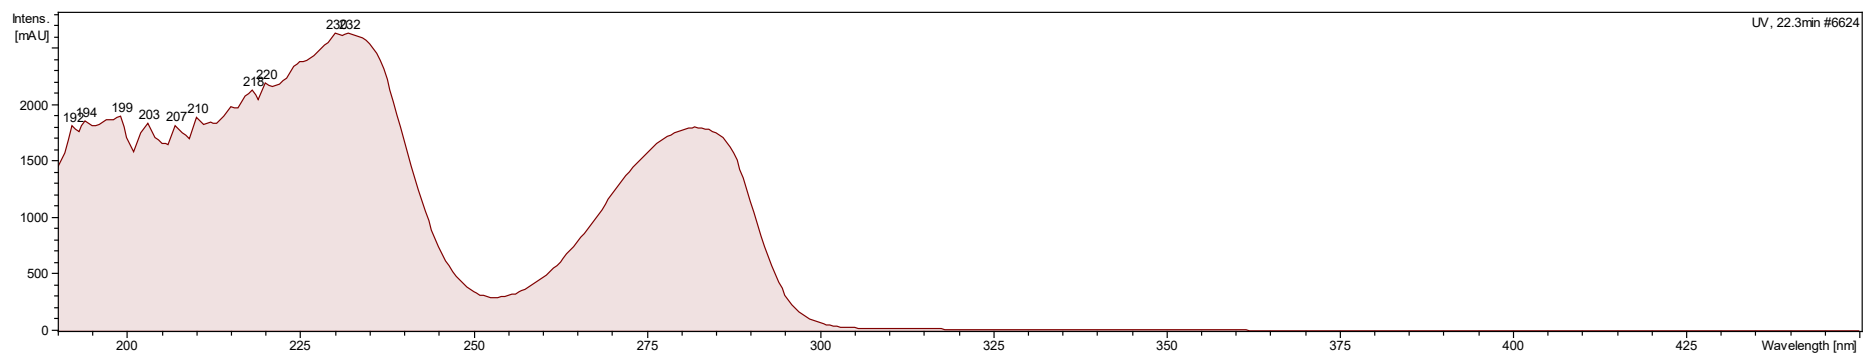

**Figure S77.** UV spectrum of compound (32).

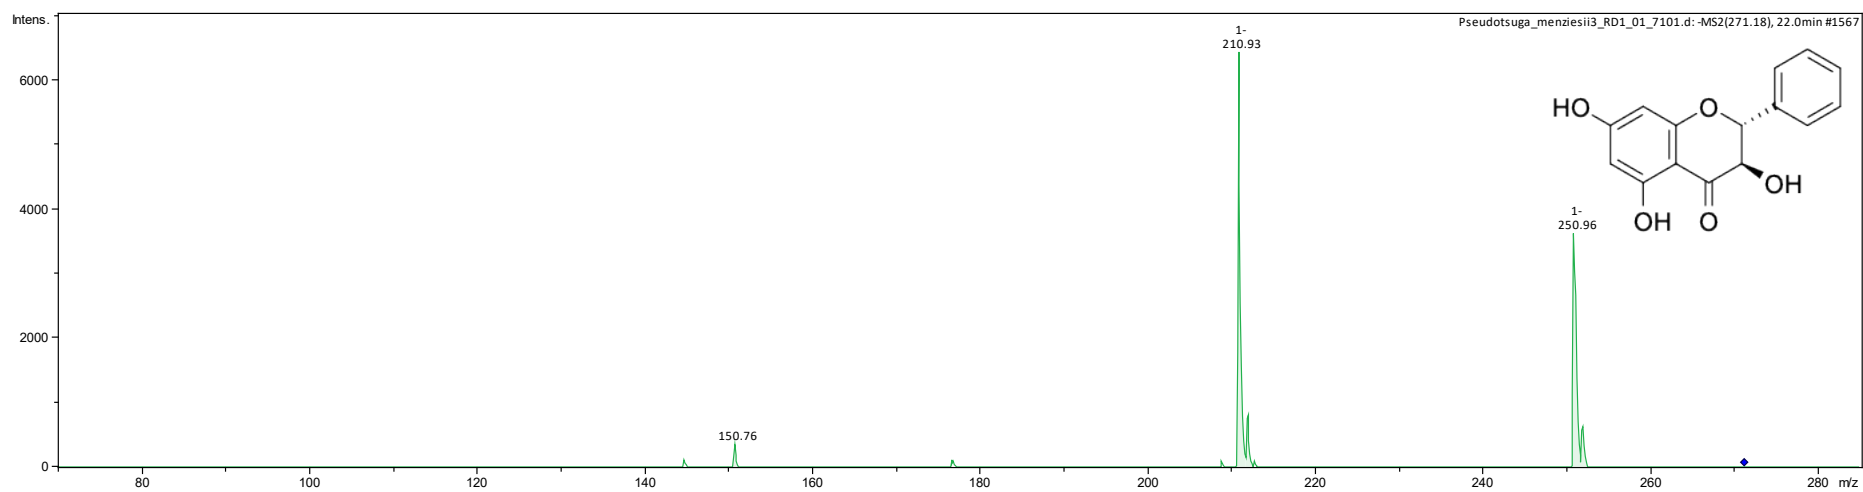

**Figure S78.** ESI-MS<sup>2</sup> spectrum (negative ion mode) of molecular ion at  $m/z$  271 – compound (33).

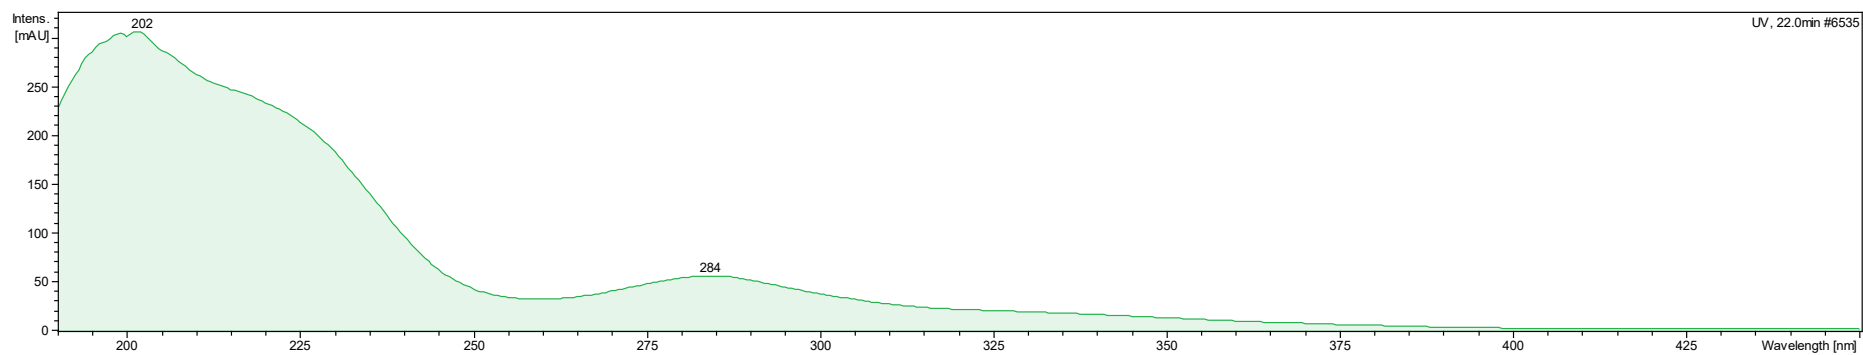

**Figure S79.** UV spectrum of compound (33).

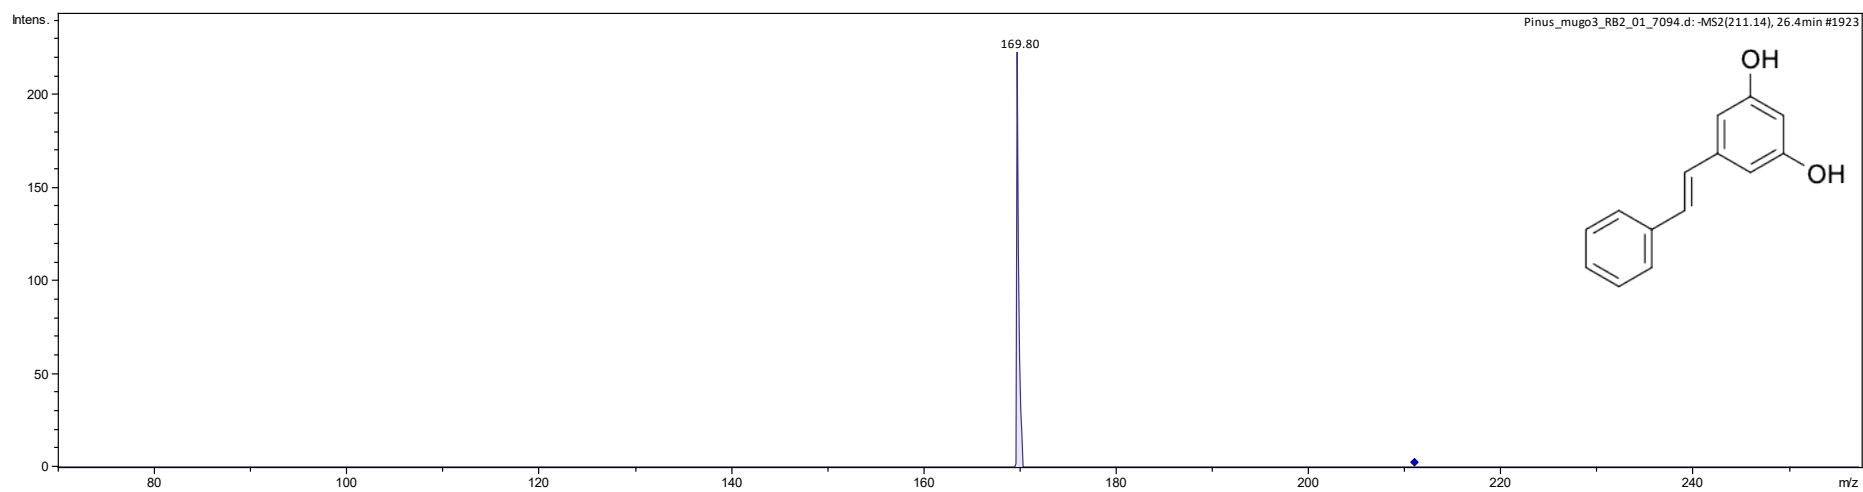

**Figure S80.** ESI-MS<sup>2</sup> spectrum (negative ion mode) of molecular ion at m/z 211 – compound (34).

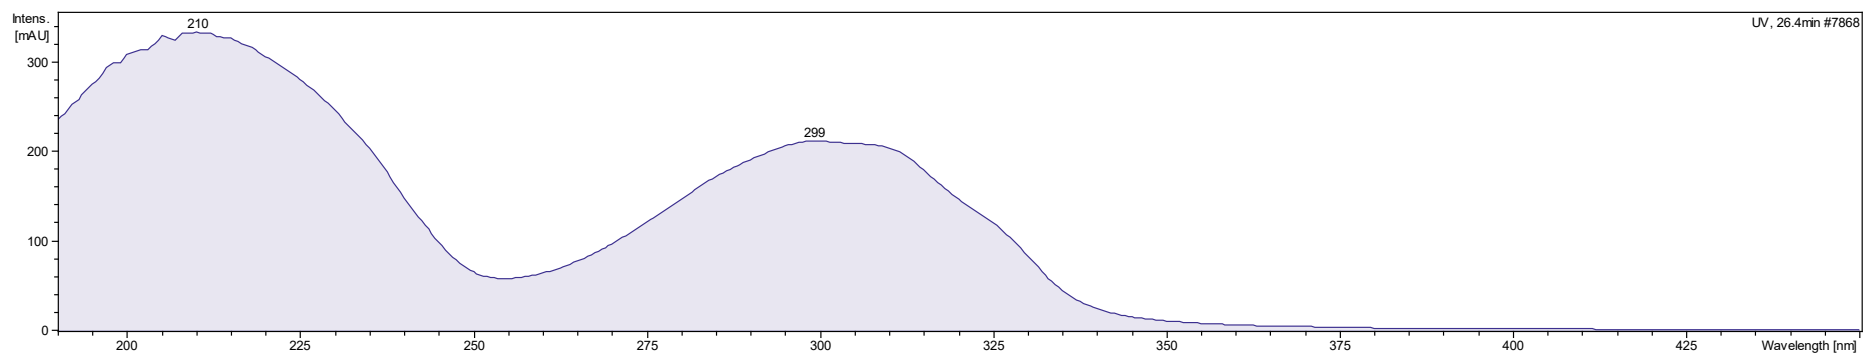

**Figure S81.** UV spectrum of compound (34).

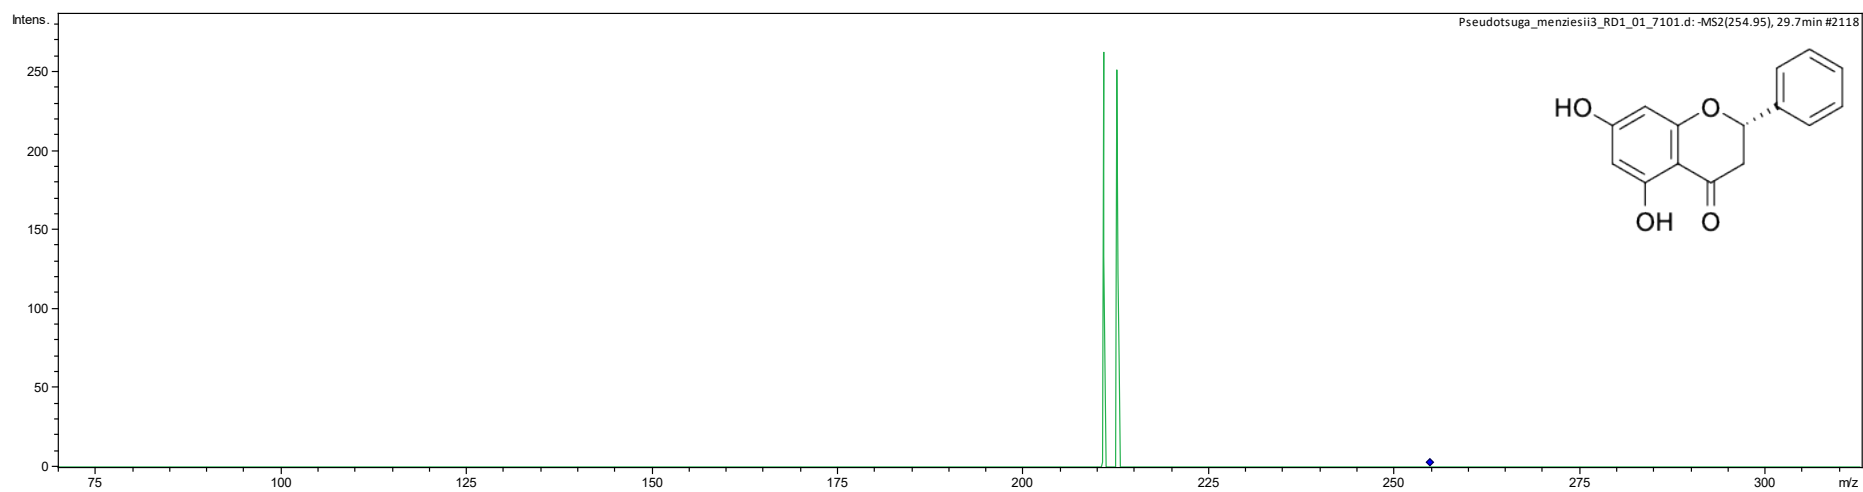

**Figure S82.** ESI-MS<sup>2</sup> spectrum (negative ion mode) of molecular ion at  $m/z$  255 – compound (35).

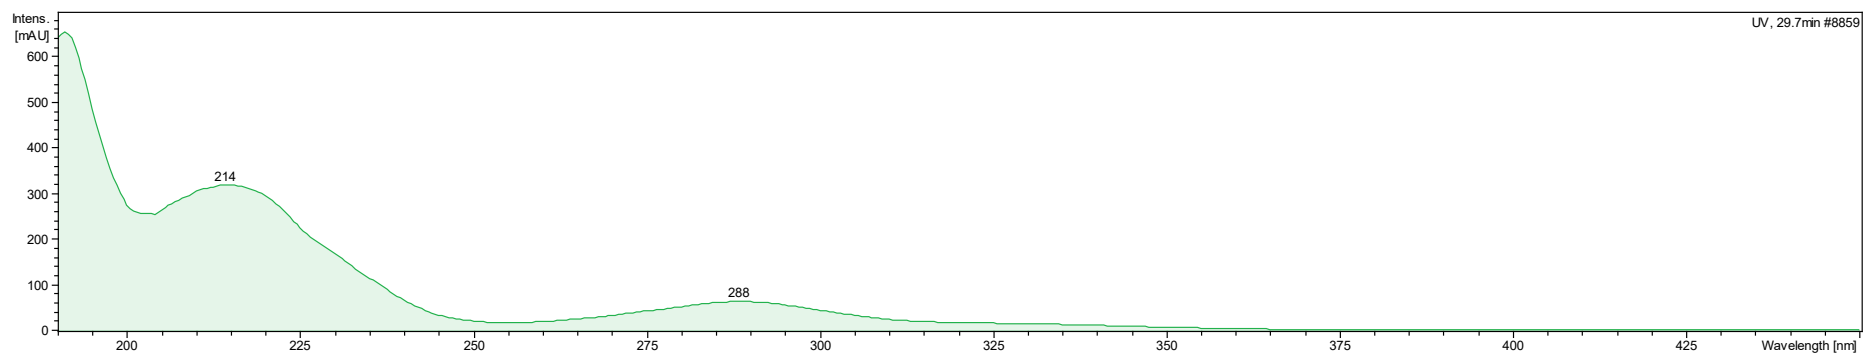

**Figure S83.** UV spectrum of compound (35).

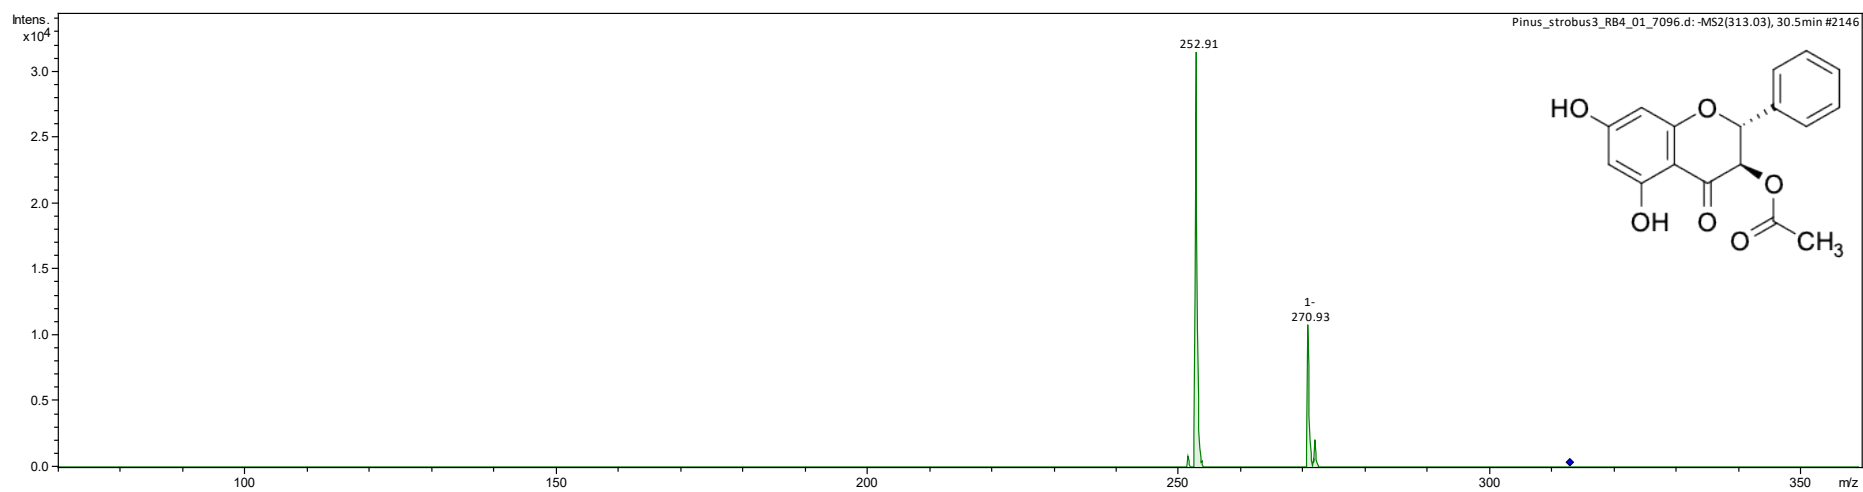

**Figure S84.** ESI-MS<sup>2</sup> spectrum (negative ion mode) of molecular ion at m/z 313 – compound (36).

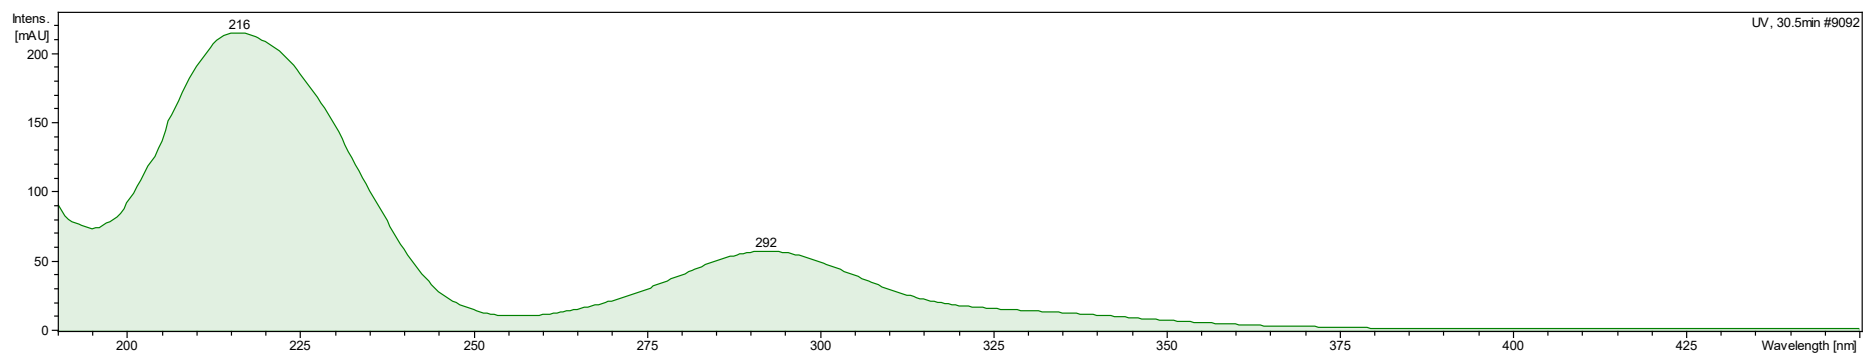

**Figure S85.** UV spectrum of compound (36).

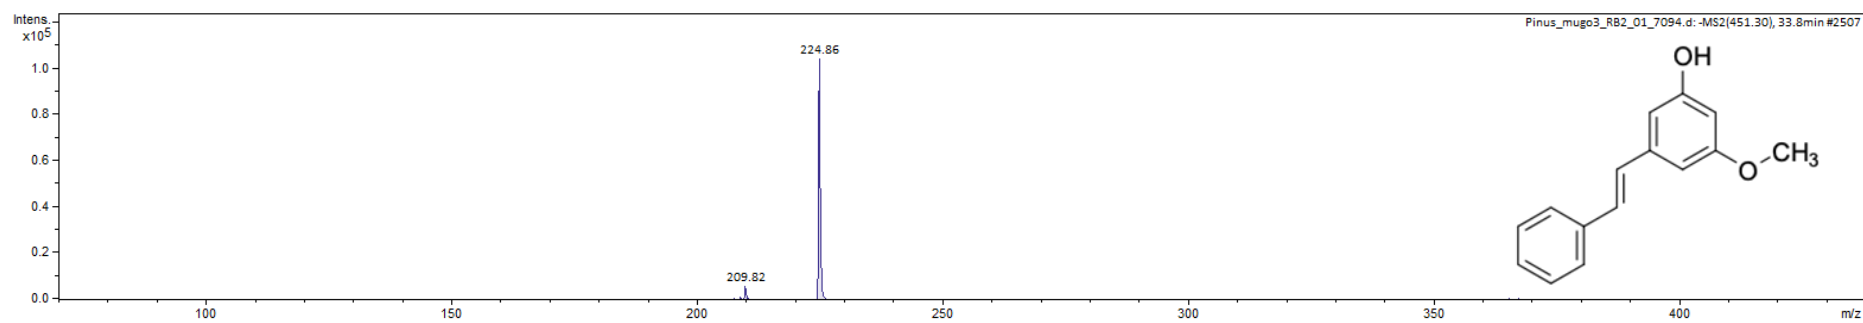

**Figure S86.** ESI-MS<sup>2</sup> spectrum (positive ion mode) of molecular ion at  $m/z$  227 – compound (37).



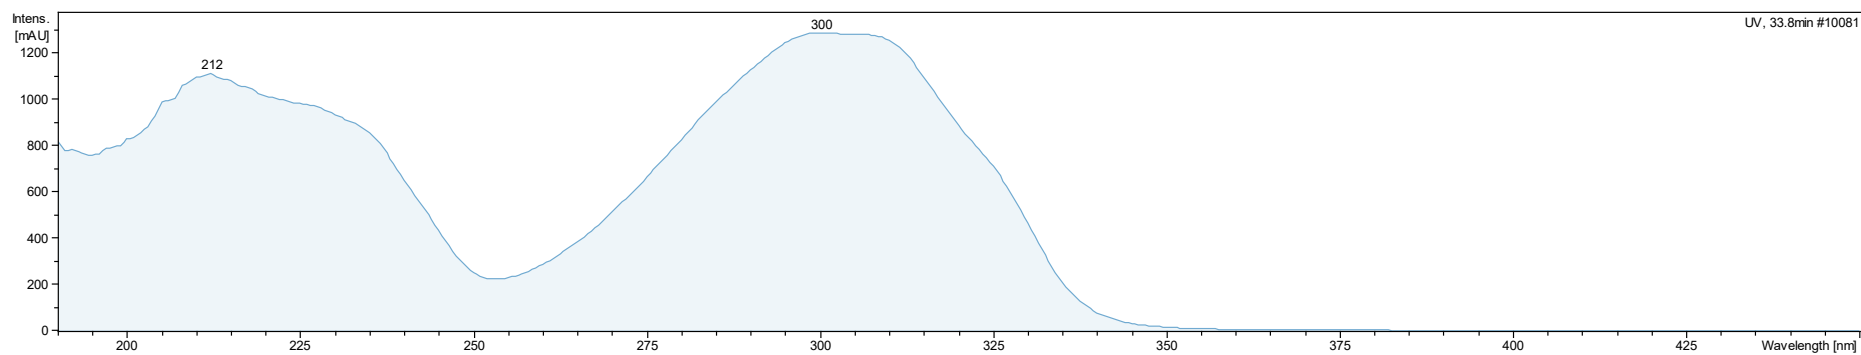

**Figure S87.** UV spectrum of compound (37).

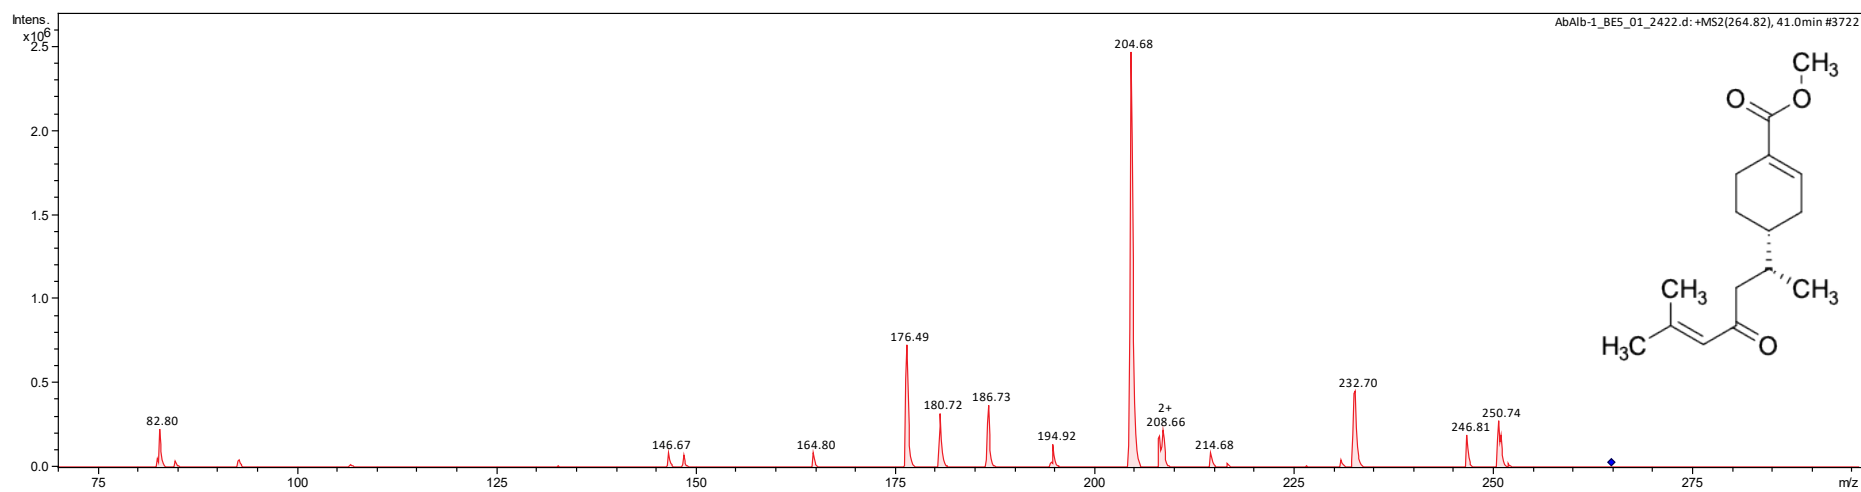

**Figure S88.** ESI-MS<sup>2</sup> spectrum (positive ion mode) of molecular ion at  $m/z$  265 – compound (38).

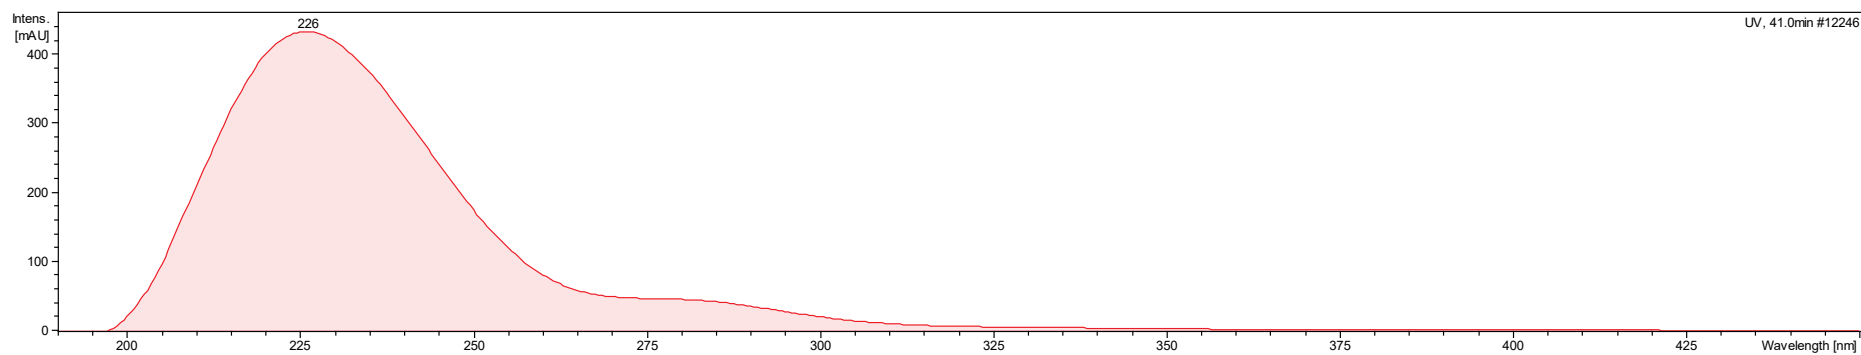

**Figure S89.** UV spectrum of compound (38).

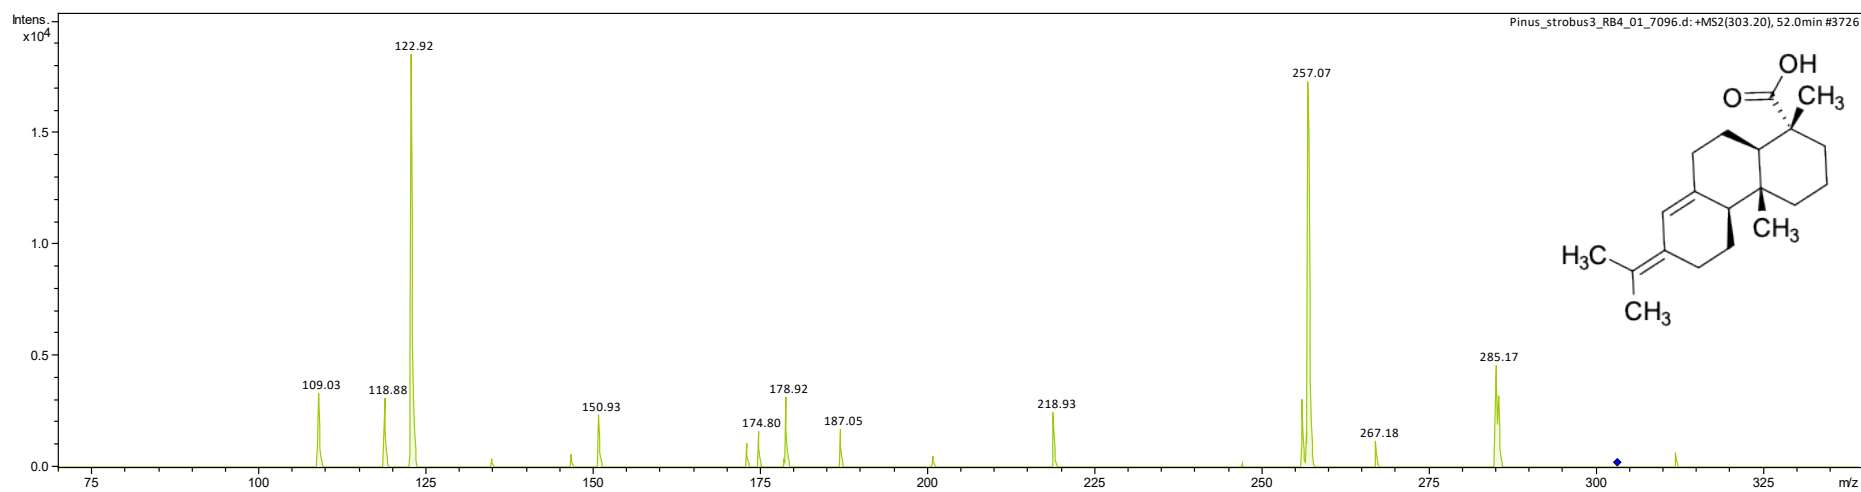

**Figure S90.** ESI-MS<sup>2</sup> spectrum (positive ion mode) of molecular ion at  $m/z$  303 – compound (39).

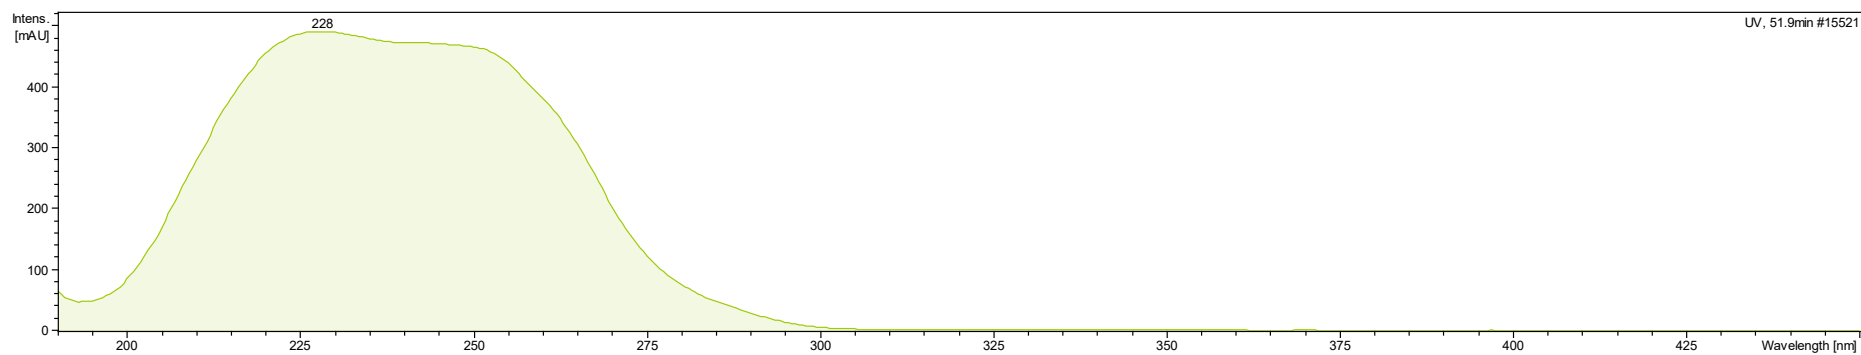

**Figure S91.** UV spectrum of compound (39).

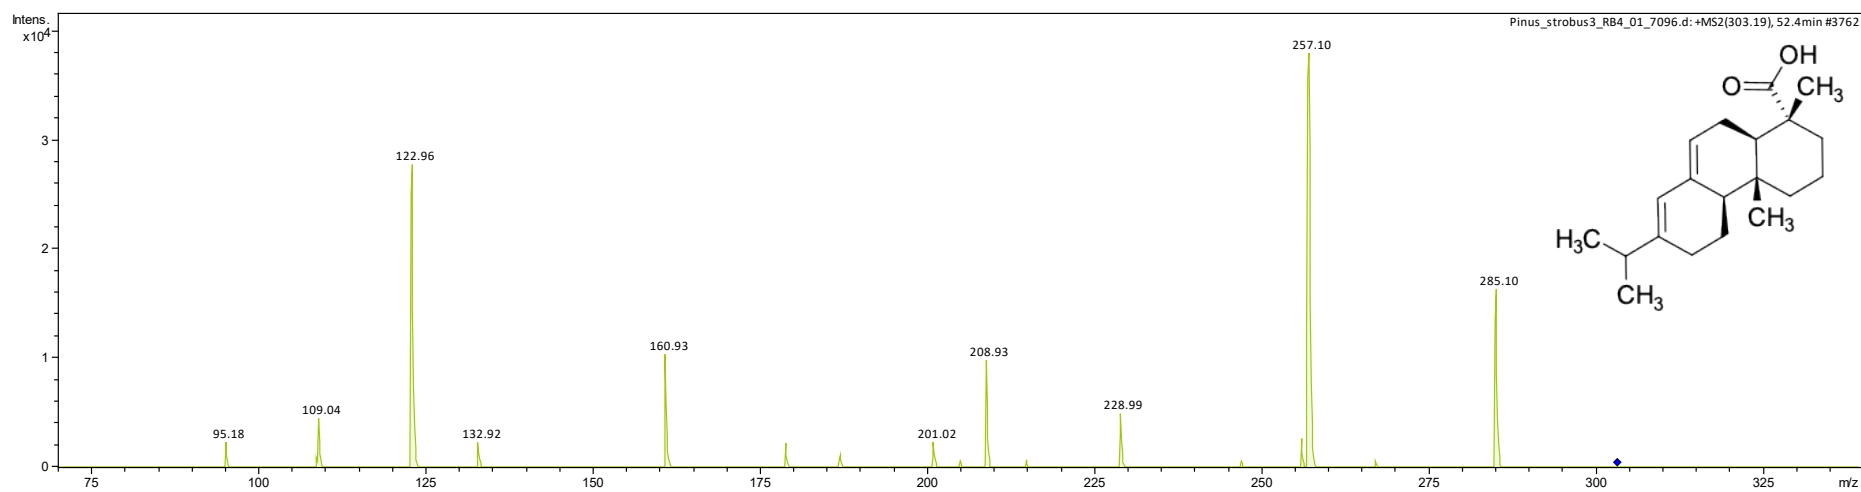

**Figure S92.** ESI-MS<sup>2</sup> spectrum (positive ion mode) of molecular ion at  $m/z$  303 – compound (40).

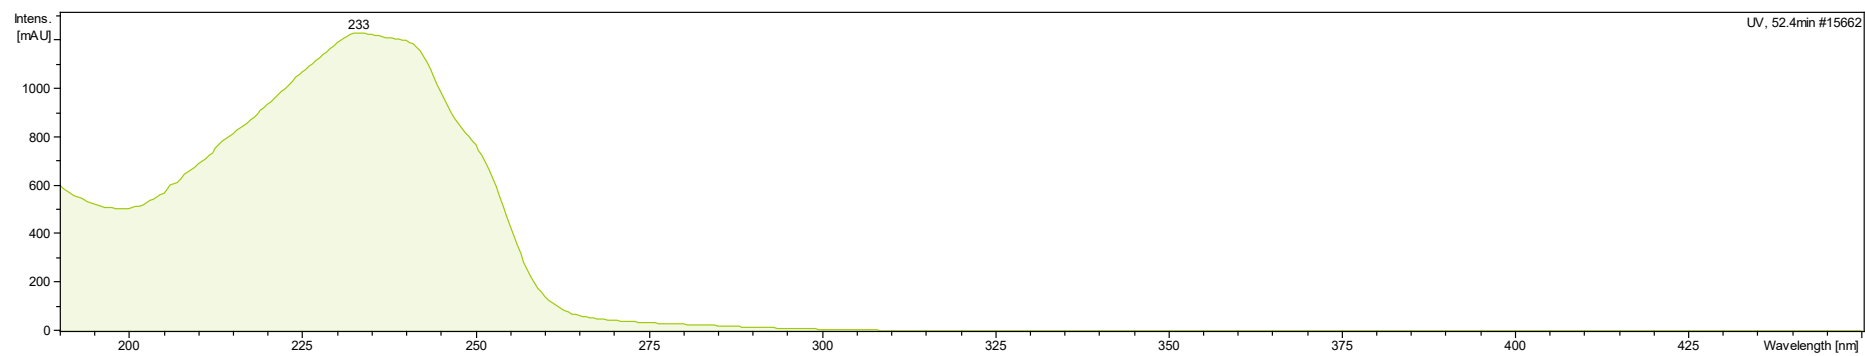

**Figure S93.** UV spectrum of compound (40).

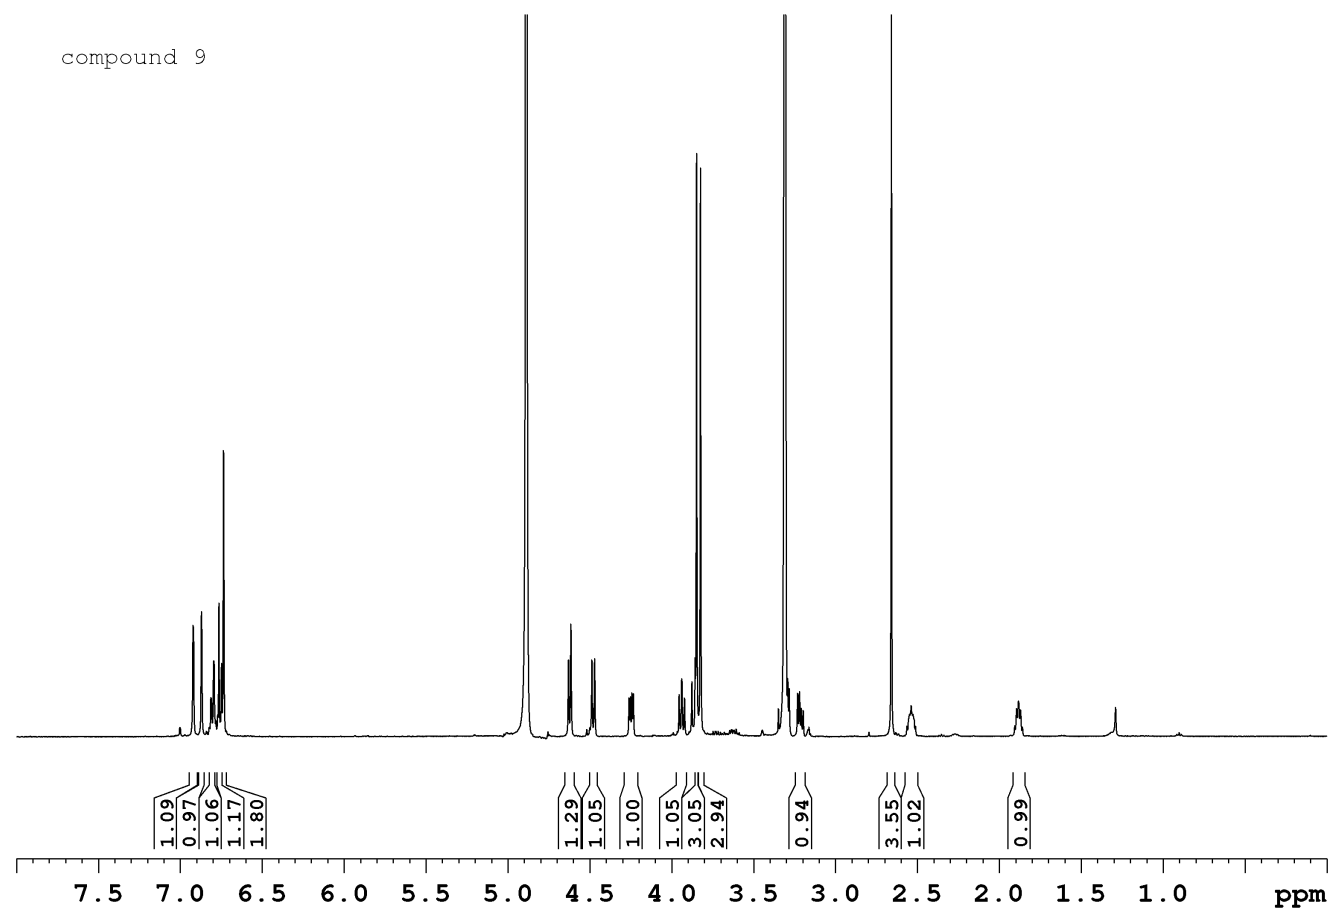

Figure S94.  $^1\text{H}$  NMR spectrum of compound (9).

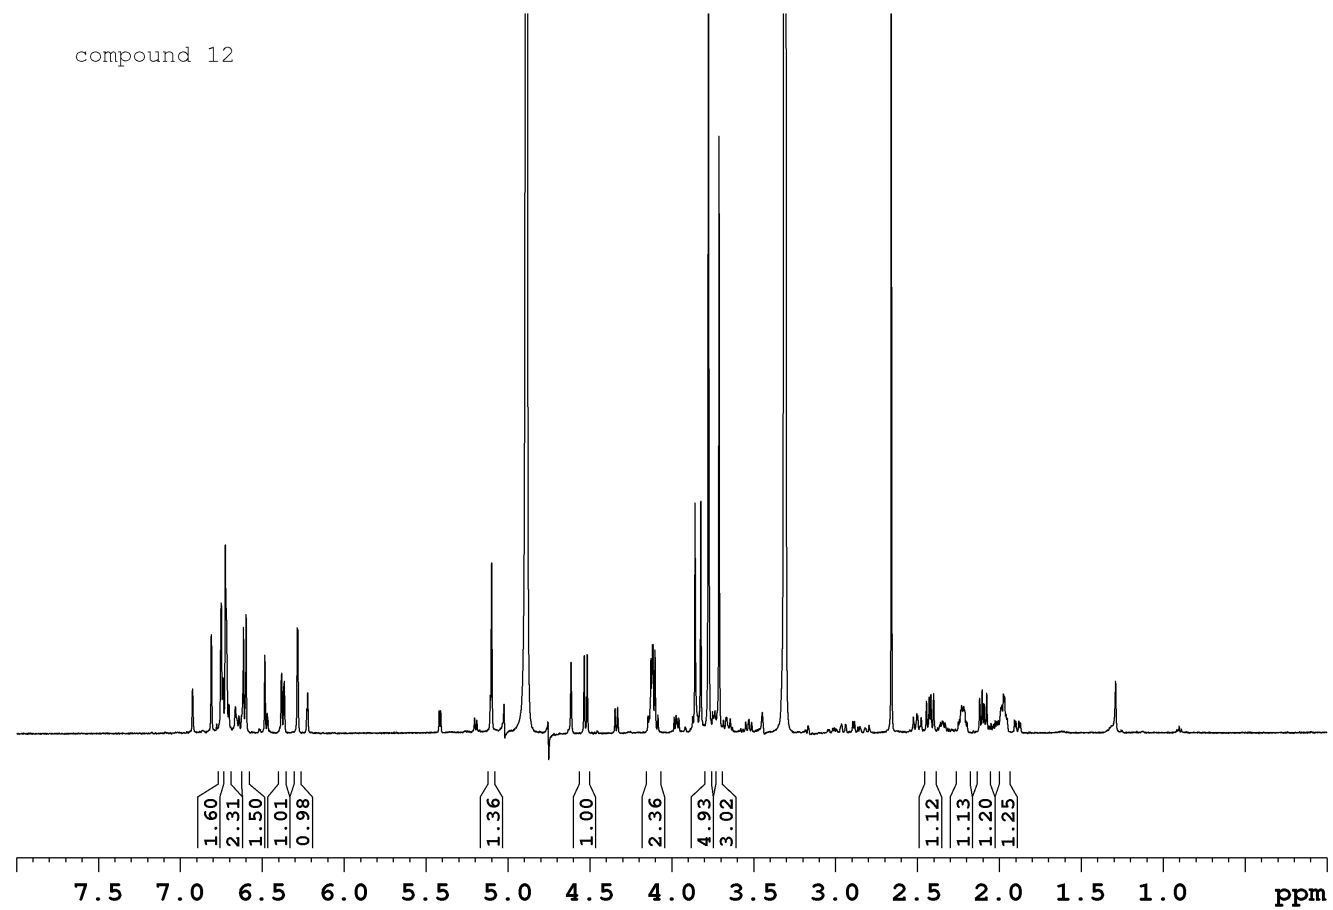

Figure S95.  $^1\text{H}$  NMR spectrum of compound (12).

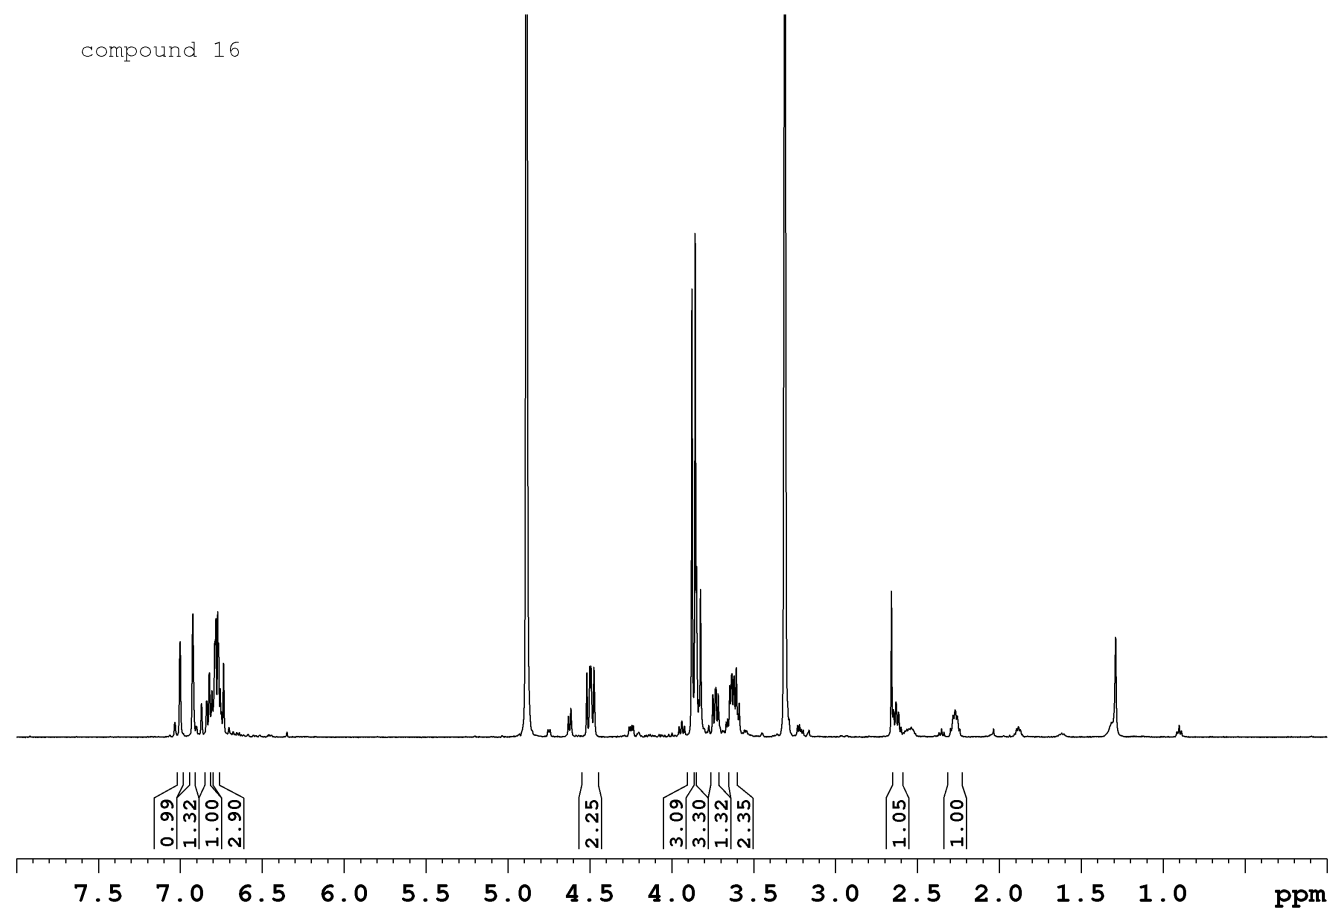

Figure S96.  $^1\text{H}$  NMR spectrum of compound (16).

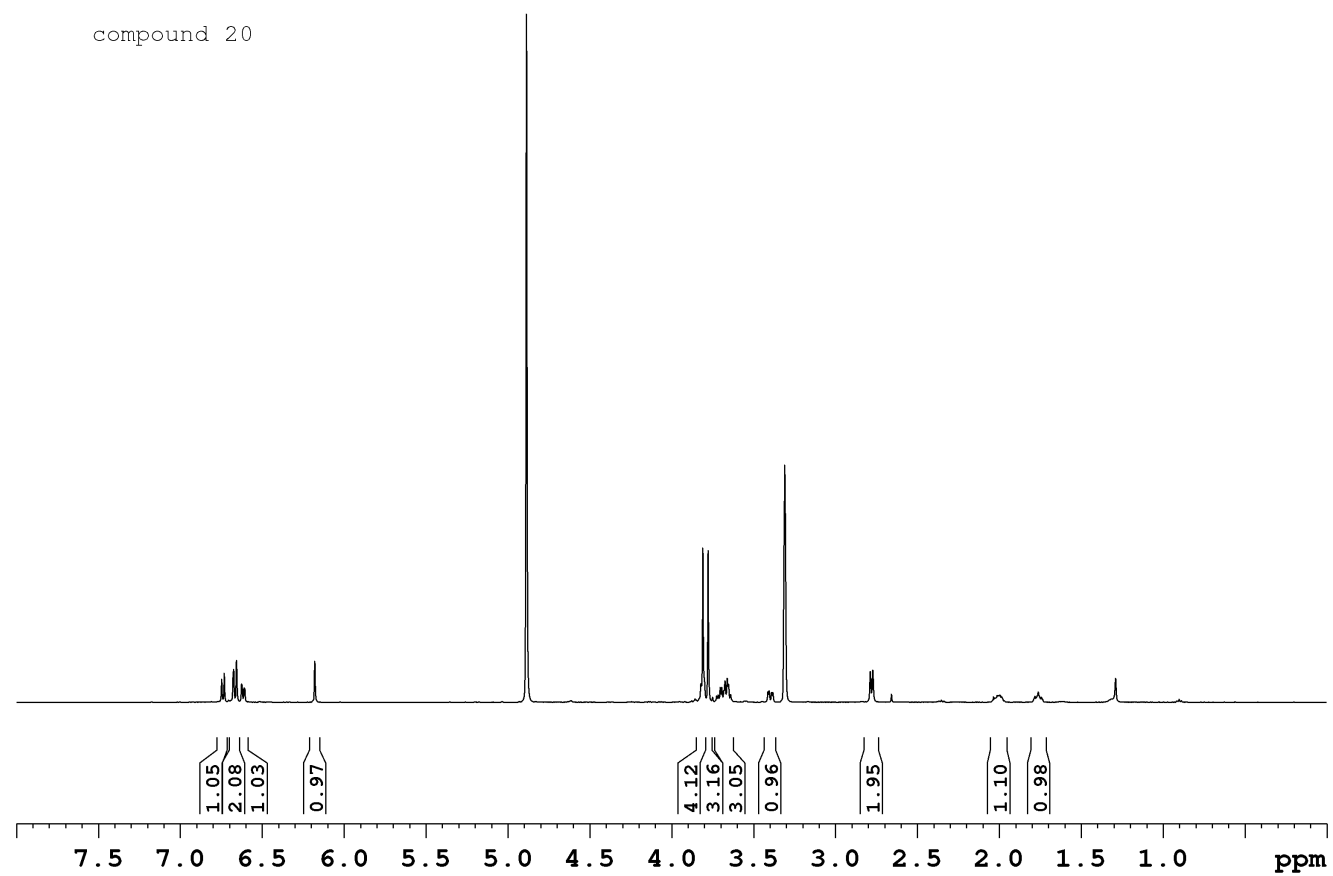

Figure S97.  $^1\text{H}$  NMR spectrum of compound (20).



compounds 22

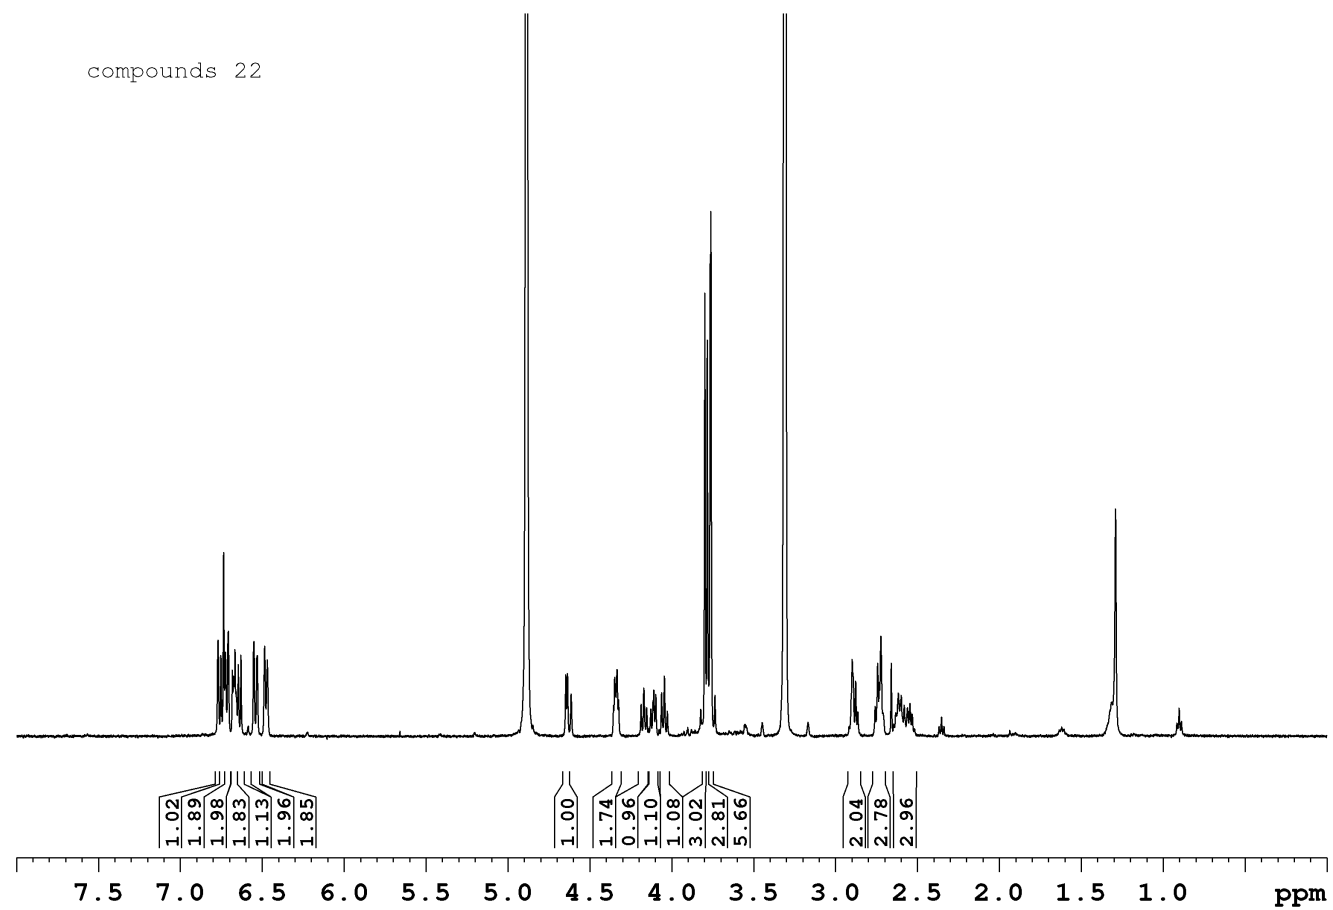

Figure S98.  $^1\text{H}$  NMR spectrum of compound (22).

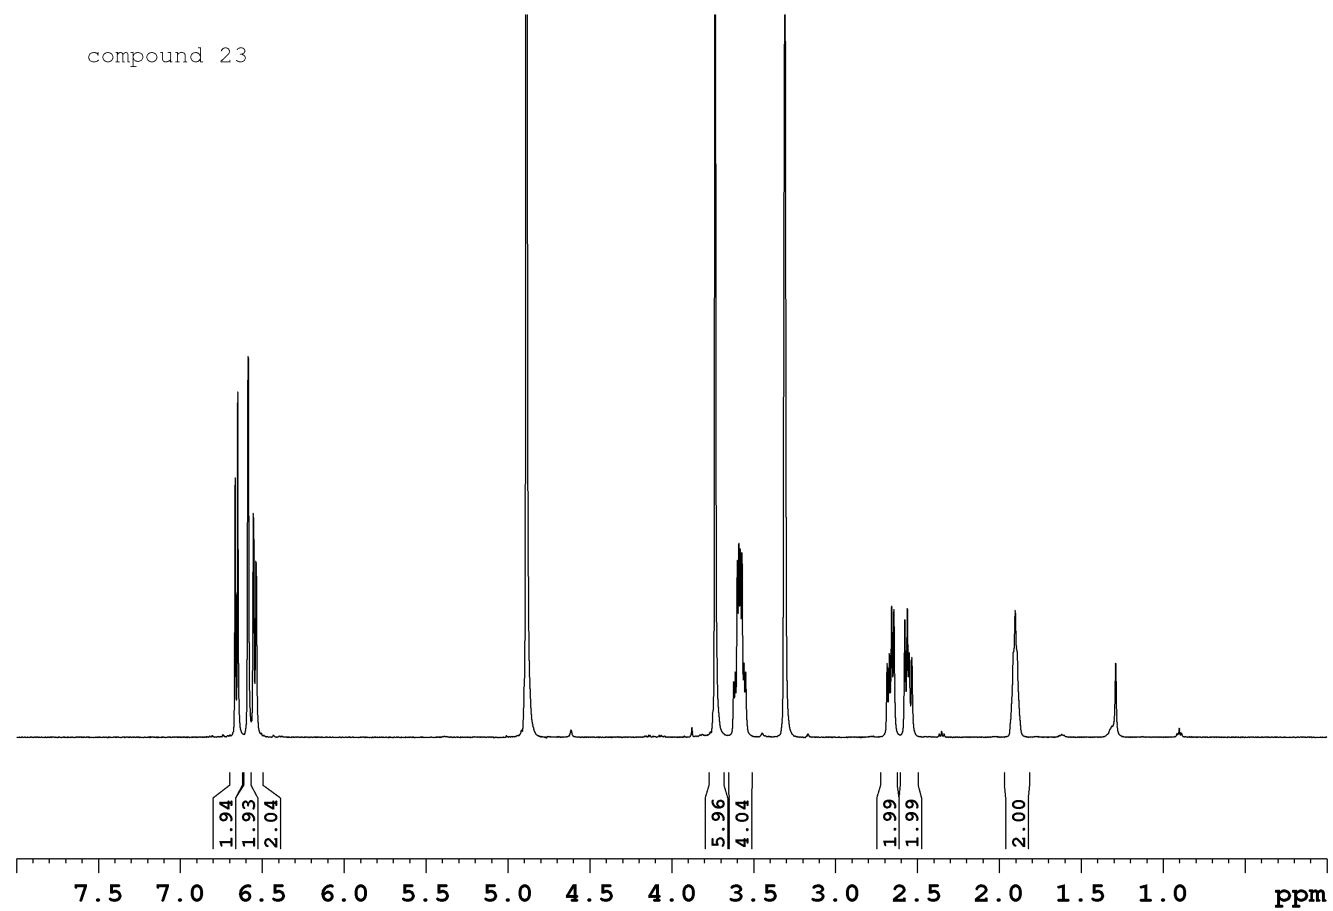

Figure S99. <sup>1</sup>H NMR spectrum of compound (23).

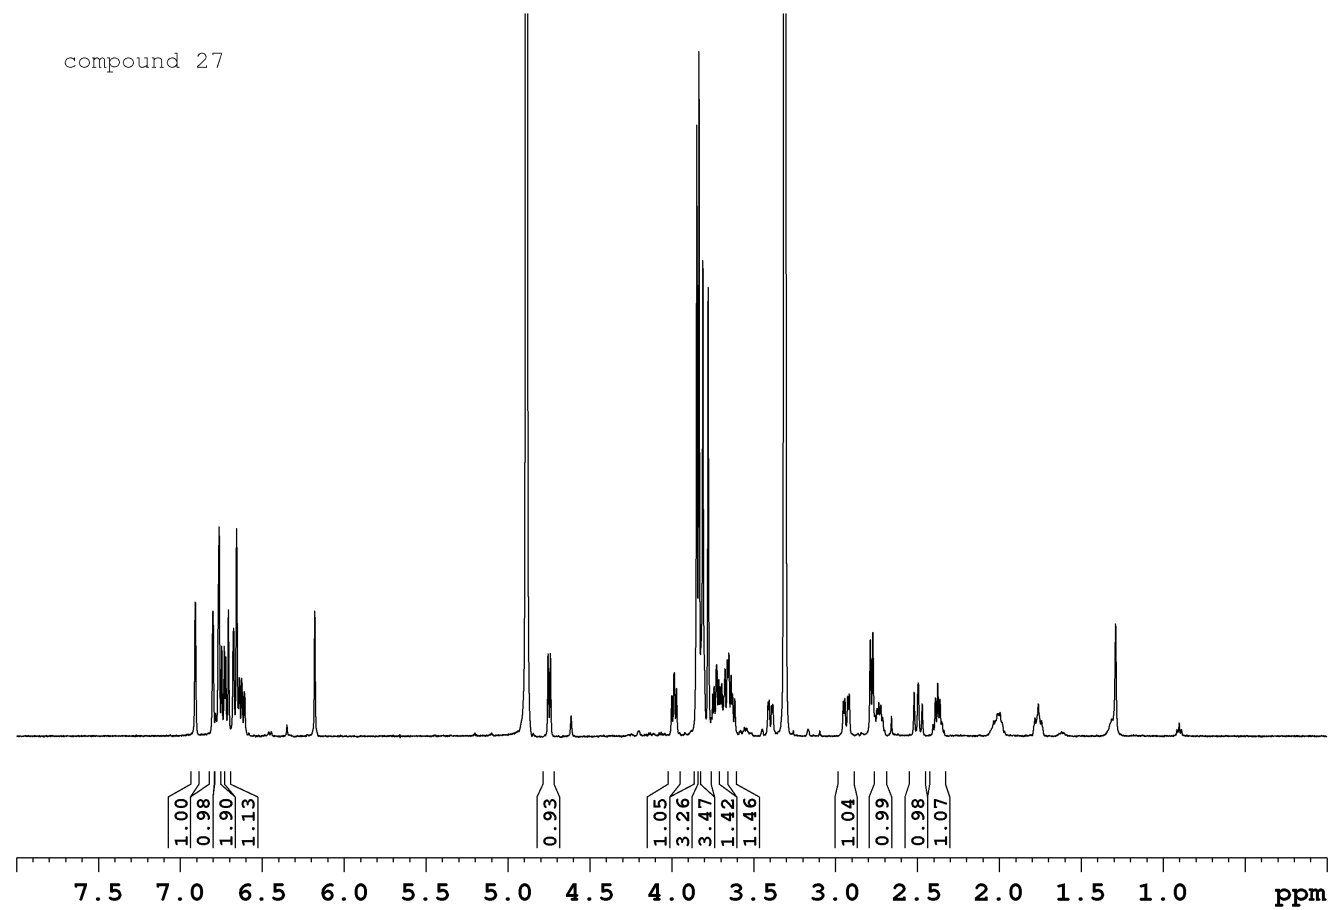

Figure S100. <sup>1</sup>H NMR spectrum of compound (27).

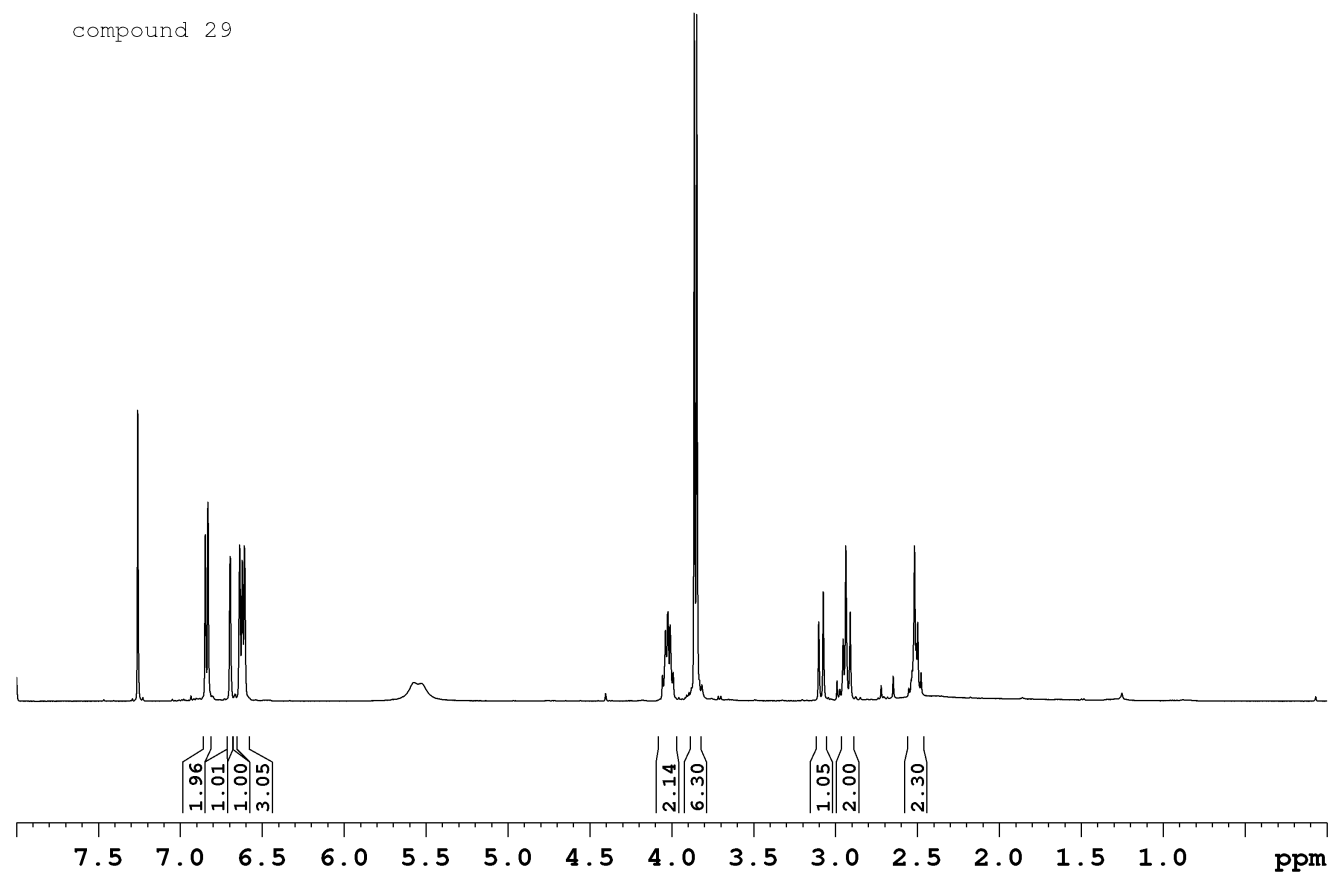

**Figure S101.**  $^1\text{H}$  NMR spectrum of compound (29).

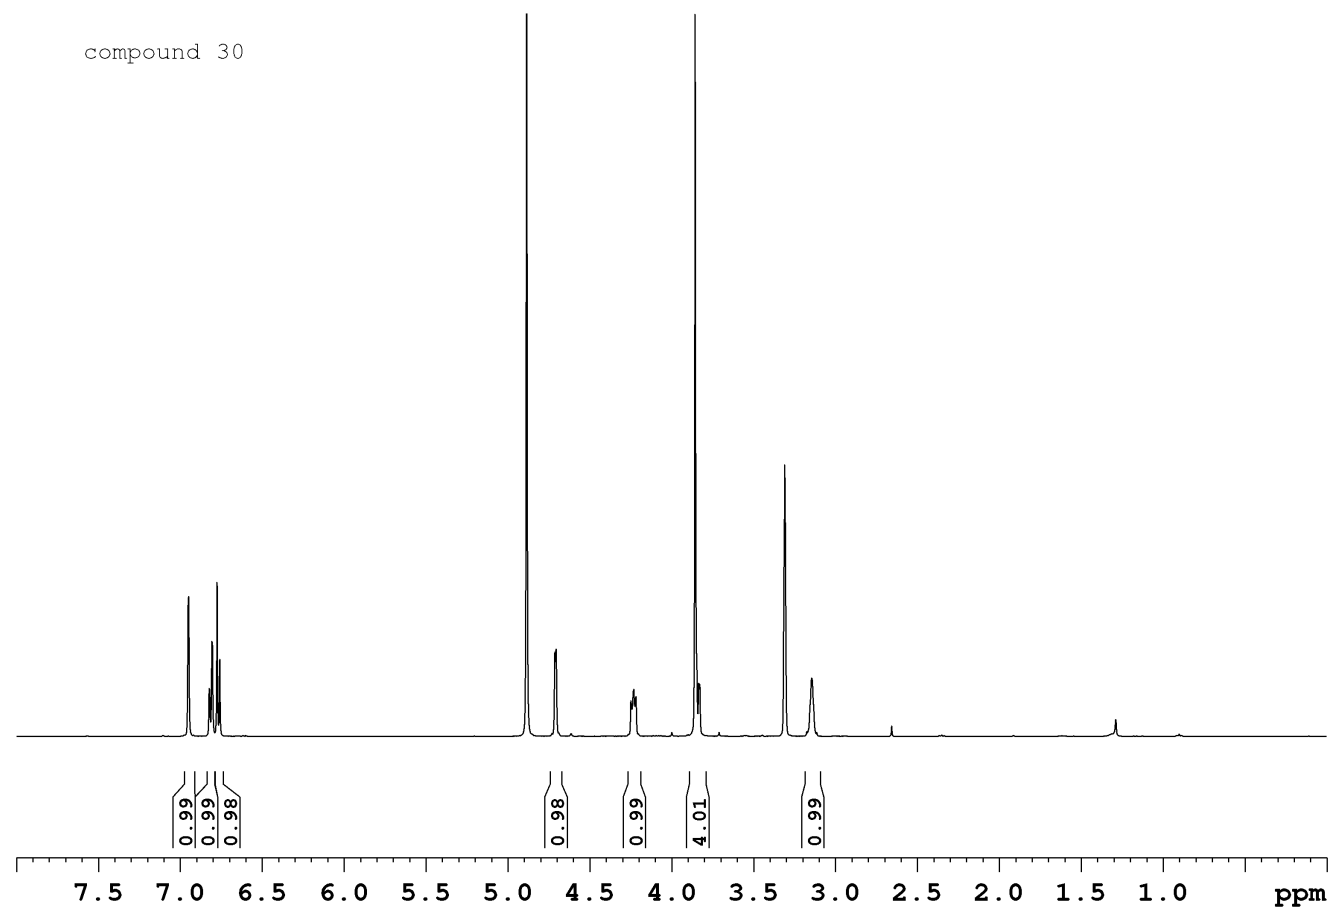

**Figure S102.**  $^1\text{H}$  NMR spectrum of compound (30).

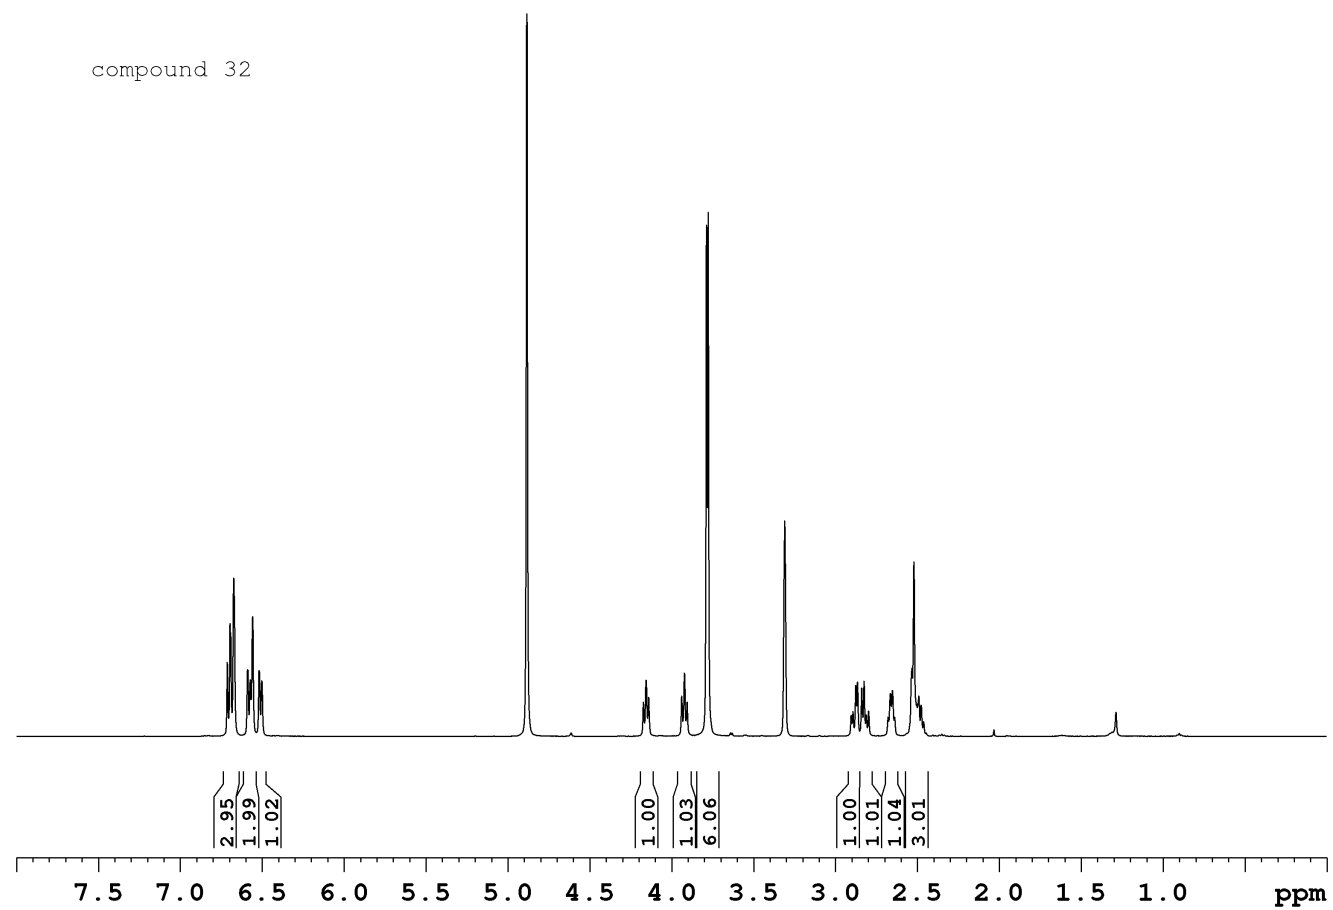

Figure S103.  $^1\text{H}$  NMR spectrum of compound (32).

**Table S1.** <sup>1</sup>H chemical shifts in ppm for compounds **9**, **12**, **16**, **20**, **22**, **23**, **27**, **30** and **32** in methanol-d<sub>4</sub> and **29** in chloroform-d (500 MHz, 295 K).

| atom | <b>9</b> | <b>12</b> | <b>16</b> | <b>20</b> | <b>22*</b> | <b>23</b> | <b>27</b> | <b>29</b> | <b>30</b> | <b>32</b> |
|------|----------|-----------|-----------|-----------|------------|-----------|-----------|-----------|-----------|-----------|
| H2   | 6.92     | 6.29      | 6.92      | 6.18      | 6.53; 6.55 | 6.59      | 6.91      | 6.70      | 6.95      | 6.67      |
| H5   | 6.76     | 6.61      | 6.78      | 6.67      | 6.64; 6.67 | 6.66      | 6.77      | 6.84      | 6.76      | 6.71      |
| H6   | 6.81     | 6.37      | 6.80      |           | 6.48; 6.48 | 6.55      | 6.77      | 6.63      | 6.81      | 6.58      |
| H7a  | 4.62     | 2.10      | 4.51      | 2.78      | 2.59; 2.73 | 2.56      | 4.75      | 2.92      | 4.71      | 2.82      |
| H7b  | -        | 2.41      | -         | 2.78      | 2.73; 2.88 | 2.67      | -         | 3.09      | -         | 2.89      |
| H8   | 1.88     | 1.99      | 2.27      | 2.00      | 2.73; 2.90 | 1.90      | 2.38      | -         | 3.15      | 2.66      |
| H9a  | 3.21     | 5.10      | 3.61      | 3.67      | -          | 3.56      | 3.63      | -         | 3.84      | -         |
| H9b  | 3.30     | -         | 3.73      | 3.67      | -          | 3.61      | 3.83      | -         | 4.23      | -         |
| OMe  | 3.85     | 3.72      | 3.86      | 3.81      | 3.76; 3.77 | 3.74      | 3.85      | 3.85      | 3.86      | 3.79      |
| H2'  | 6.87     | 6.75      | 7.00      | 6.68      | 6.71; 6.77 | 6.59      | 6.80      | 6.61      | 6.95      | 6.56      |
| H5'  | 6.74     | 6.73      | 6.78      | 6.74      | 6.74; 6.74 | 6.66      | 6.72      | 6.84      | 6.76      | 6.68      |
| H6'  | 6.74     | 6.72      | 6.83      | 6.62      | 6.66; 6.73 | 6.55      | 6.65      | 6.63      | 6.81      | 6.51      |
| H7'a | 4.48     | 4.53      | 4.48      | 3.81      | 4.34; 4.64 | 2.56      | 2.50      | 2.51      | 4.71      | 2.53      |
| H7'b | -        | -         | -         | -         | -          | 2.67      | 2.94      | 2.95      | -         | 2.53      |
| H8'  | 2.54     | 2.23      | 2.63      | 1.76      | 2.55; 2.62 | 1.90      | 2.74      | 2.51      | 3.15      | 2.49      |
| H9'a | 3.94     | 4.11      | 3.63      | 3.40      | 4.05; 4.17 | 3.56      | 3.72      | 4.01      | 3.84      | 3.92      |
| H9'b | 4.25     | 4.11      | 3.63      | 3.71      | 4.11; 4.34 | 3.61      | 3.99      | 4.04      | 4.23      | 4.16      |
| OMe' | 3.82     | 3.78      | 3.88      | 3.78      | 3.78; 3.80 | 3.74      | 3.83      | 3.86      | 3.86      | 3.78      |

\* isolated as a mixture of diastereoisomers at C7'

**Table S2.** Canonical SMILES of identified compounds

| Compounds | Canonical SMILES                                                                                                                                            |
|-----------|-------------------------------------------------------------------------------------------------------------------------------------------------------------|
| 1.        | <chem>C1C(C(OC2=CC(=CC(=C21)O)O)C3=CC(=C(C(=C3)O)O)O)O</chem>                                                                                               |
| 2.        | <chem>C1C(C(OC2=C1C(=CC(=C2C3C(C(OC4=CC(=CC(=C34)O)O)C5=CC(=C(C(=C5)O)O)O)O)O)C6=CC(=C(C(=C6)O)O)O)O</chem>                                                 |
| 3.        | <chem>C1C(C(OC2=C1C(=CC(=C2C3C(C(OC4=CC(=CC(=C34)O)O)C5=CC(=C(C(=C5)O)O)O)O)O)C6=CC(=C(C(=C6)O)O)O)O</chem>                                                 |
| 4.        | <chem>C1C(C(OC2=C1C(=CC(=C2C3C(C(OC4=C(C(=CC(=C34)O)O)C5C(C(OC6=CC(=CC(=C56)O)O)C7=CC(=C(C(=C7)O)O)O)C8=CC(=C(C(=C8)O)O)O)O)O)C9=CC(=C(C(=C9)O)O)O)O</chem> |
| 5.        | <chem>C1C(C(OC2=CC(=CC(=C21)O)O)C3=CC(=C(C(=C3)O)O)O)O</chem>                                                                                               |
| 6.        | <chem>C1C(C(OC2=C1C(=CC(=C2C3C(C(OC4=CC(=CC(=C34)O)O)C5=CC(=C(C(=C5)O)O)O)O)O)C6=CC(=C(C(=C6)O)O)O)O</chem>                                                 |
| 7.        | <chem>C1C(C(OC2=CC(=CC(=C21)O)O)C3=CC(=C(C(=C3)O)O)O)O</chem>                                                                                               |
| 8.        | <chem>C1=C(C=C(C(=C1O)O)O)C2C(C(=O)C3=C(C=C(C(=C3O2)O)O)O)O</chem>                                                                                          |
| 9.        | <chem>COC1=C(C=CC(=C1)C2C(C(CO2)C(C3=CC(=C(C(=C3)O)OC)O)CO)O</chem>                                                                                         |
| 10.       | <chem>C1=CC(=C(C=C1C=CC2=CC(=CC(=C2)OC3C(C(C(C(O3)CO)O)O)O)O)O)O</chem>                                                                                     |
| 11.       | <chem>C1=CC(=CC=C1C2C(C(=O)C3=C(C=C(C(=C3O2)O)O)O)O)O</chem>                                                                                                |
| 12.       | <chem>COC1=C(C=CC(=C1)CC2C(COC2O)C(C3=CC(=C(C(=C3)O)OC)O)O</chem>                                                                                           |
| 13.       | <chem>C1=CC(=C(C=C1C2C(C(=O)C3=C(C=C(C(=C3O2)OC4C(C(C(C(O4)CO)O)O)O)O)O)O)O)O</chem>                                                                        |
| 14.       | <chem>C1=CC(=C(C=C1C=CC2=CC(=CC(=C2)OC3C(C(C(C(O3)CO)O)O)O)O)O)O</chem>                                                                                     |
| 15.       | <chem>C1C(C(OC2=C1C(=CC(=C2C3C(C(OC4=CC(=CC(=C34)O)O)C5=CC(=C(C(=C5)O)O)O)O)O)C6=CC(=C(C(=C6)O)O)O)O</chem>                                                 |
| 16.       | <chem>COC1=C(C=CC(=C1)C2C(C(CO2)C(C3=CC(=C(C(=C3)O)OC)O)CO)O</chem>                                                                                         |
| 17.       | <chem>C1=CC(=CC=C1C=CC2=CC(=CC(=C2)OC3C(C(C(C(O3)CO)O)O)O)O)O</chem>                                                                                        |
| 18.       | <chem>C1=CC(=C(C=C1C2C(C(=O)C3=C(C=C(C(=C3O2)O)O)O)O)O</chem>                                                                                               |
| 19.       | <chem>COC1=C(C=CC(=C1)C=CC2=CC(=CC(=C2)OC3C(C(C(C(O3)CO)O)O)O)O)O</chem>                                                                                    |
| 20.       | <chem>COC1=C(C=C2C(C(C(CC2=C1)CO)CO)C3=CC(=C(C(=C3)O)OC)O</chem>                                                                                            |
| 21.       | <chem>COC1=C(C=C2C(C(C(CC2=C1)C(=O)O)CO)C3=CC(=C(C(=C3)O)OC)O</chem>                                                                                        |
| 22.       | <chem>COC1=C(C=CC(=C1)CC2COC(=O)C2C(C3=CC(=C(C(=C3)O)OC)O)O</chem>                                                                                          |
| 23.       | <chem>COC1=C(C=CC(=C1)CC(CO)C(CC2=CC(=C(C(=C2)O)OC)CO)O</chem>                                                                                              |
| 24.       | <chem>C1C(OC2=CC(=CC(=C2C1=O)O)O)C3=CC(=C(C(=C3)O)O</chem>                                                                                                  |
| 25.       | <chem>C1=C(C=C(C(=C1O)O)O)C2=C(C(=O)C3=C(C=C(C(=C3O2)O)O)O</chem>                                                                                           |
| 26.       | <chem>COC1=C(C=CC(=C1)CC(CO)C(CC2=CC(=C(C(=C2)OC(CO)C(C3=CC(=C(C(=C3)O)OC)O)OC)CO)O</chem>                                                                  |
| 27.       | <chem>COC1=C(C=CC(=C1)CC2COC(C2CO)C3=CC(=C(C(=C3)O)OC)O</chem>                                                                                              |
| 28.       | <chem>COC1=C(C=CC(=C1)CC2COC(C2CO)C3=CC(=C(C(=C3)OC(CO)C(C4=CC(=C(C(=C4)O)OC)O)OC)O)O</chem>                                                                |
| 29.       | <chem>COC1=C(C=C(=C1)CC2COC(=O)C2(CC3=CC(=C(C(=C3)O)OC)O)O</chem>                                                                                           |
| 30.       | <chem>COC1=C(C=CC(=C1)C2C3COC(C3CO2)C4=CC(=C(C(=C4)O)OC)O</chem>                                                                                            |
| 31.       | <chem>C1=CC(=C(C=C1C2=C(C(=O)C3=C(C=C(C(=C3O2)O)O)O)O)O</chem>                                                                                              |
| 32.       | <chem>COC1=C(C=CC(=C1)CC2COC(=O)C2CC3=CC(=C(C(=C3)O)OC)O</chem>                                                                                             |
| 33.       | <chem>C1=CC=C(C=C1)C2C(C(=O)C3=C(C=C(C(=C3O2)O)O)O)O</chem>                                                                                                 |
| 34.       | <chem>C1=CC=C(C=C1)C=CC2=CC(=CC(=C2)O)O</chem>                                                                                                              |
| 35.       | <chem>C1C(OC2=CC(=CC(=C2C1=O)O)O)C3=CC=CC=C3</chem>                                                                                                         |
| 36.       | <chem>CC(=O)OC1C(OC2=CC(=CC(=C2C1=O)O)O)C3=CC=CC=C3</chem>                                                                                                  |
| 37.       | <chem>COC1=CC(=CC(=C1)C=CC2=CC=C(C(=C2)O)OC</chem>                                                                                                          |
| 38.       | <chem>COC1=CC(=CC(=C1)O)C=CC2=CC=CC=C2</chem>                                                                                                               |



---

|     |                                                        |
|-----|--------------------------------------------------------|
| 39. | <chem>CC(CC(=O)C=C(C)C)C1CCC(=CC1)C(=O)OC</chem>       |
| 40. | <chem>COC1=CC(=CC(=C1)C=CC2=CC=CC=C2)OC</chem>         |
| 41. | <chem>CC(=C1CCC2C(=C1)CCC3C2(CCCC3(C)C(=O)O)C)C</chem> |
| 42. | <chem>CC(C)C1=CC2=CCC3C(C2CC1)(CCCC3(C)C(=O)O)C</chem> |

---
